# Supplementary material for: Molecular design to enhance binaphthyl-based chiroptics using organoboron chemistry in isomeric chiral scaffolds
Source: Royal Society of Chemistry journal article supplement (doi:10.1039/d1tc05329a), 2021-12-29
Supplement: d1tc05329a1.pdf [file d1tc05329a1.pdf]

# **Molecular Design to Enhance Binaphthyl-Based Chiroptics Using Organoboron Chemistry in Isomeric Chiral Scaffolds**

Kai Zhang,<sup>a</sup> Jingyi Zhao,<sup>a</sup> Niu Zhang,<sup>b</sup> Jin-Fa Chen,<sup>a</sup> Nan Wang,<sup>a</sup> Xiaodong Yin,<sup>a</sup>  
Xiaoyan Zheng\*<sup>a</sup> and Pangkuan Chen\*<sup>a</sup>

<sup>a</sup>Beijing Key Laboratory of Photoelectronic/Electrophotonic Conversion Materials, Key Laboratory of Cluster Science of the Ministry of Education, School of Chemistry and Chemical Engineering, Beijing Institute of Technology of China, Beijing, 102488, China

<sup>b</sup>Analysis & Testing Centre, Beijing Institute of Technology of China, Beijing, 102488, China

\* xiaoyanzheng@bit.edu.cn; pangkuan@bit.edu.cn

## **Table of Contents**

|                                                                                     |           |
|-------------------------------------------------------------------------------------|-----------|
| <b>1. Experimental Section</b> .....                                                | <b>1</b>  |
| <b>2. Synthetic Procedures</b> .....                                                | <b>2</b>  |
| <b>3. Characterization by NMR Spectroscopy</b> .....                                | <b>7</b>  |
| <b>4. PL Spectra and Transient PL Decay Curves</b> .....                            | <b>19</b> |
| <b>5. Chiral HPLC Trace Analysis</b> .....                                          | <b>24</b> |
| <b>6. CPL Spectra in Different Solutions</b> .....                                  | <b>27</b> |
| <b>7. Thermochromic Emissions and Aggregation-induced Emission Properties</b> ..... | <b>28</b> |
| <b>8. DFT and TD-DFT Computations and Electrochemical Measurements</b> .....        | <b>31</b> |

## 1. Experimental Section

**Materials and General Methods:** 2-Naphthol, 7-bromo-2-naphthol, 4-(diphenylamino)-phenylboronic acid,  $K_2CO_3$ ,  $Pd(PPh_3)_4$ ,  $FeCl_3 \cdot 6H_2O$ ,  $CH_2BrCl$ , and  $CH_3I$  were purchased from Energy Chemical. Tetrahydrofuran (THF), dichloromethane, petroleum ether, methanol, and ethyl acetate were purchased from Sinopharm Chemical Reagent Co., Ltd. The chemicals were used without further purification unless otherwise noted. Anhydrous solvents were distilled from commercial materials with sodium/benzophenone.

All commercial chemicals were used without further purification. 2,2'-Dihydroxy-1,1'-binaphthyl (**1**), 6,6'-dibromo-2,2'-dihydroxy-1,1'-binaphthyl (**2**), 6,6'-dibromo-1,1'-binaphthyl-2,2'-diyloxymethane (**3**), 6,6'-dibromo-2,2'-dimethoxy-1,1'-binaphthalene (**5**) and 7,7'-dibromo-2,2'-dihydroxy-1,1'-binaphthyl (**7**) were prepared using the similar procedures previously described.<sup>[1, 2, 3, 4]</sup>

400 MHz  $^1H$ , 101 MHz  $^{13}C$ , and 225 MHz  $^{11}B$  NMR spectra were recorded on a Bruker spectrometer.  $^{11}B$  NMR spectra were acquired with boron-free quartz NMR tubes and the spectra were referenced externally to  $BF_3 \cdot Et_2O$  ( $\delta = 0$ ). High resolution mass spectral data were obtained via ESI on an Agilent (Q-TOF 6520) analyzer.

UV-visible absorption spectra were recorded on a Cary 300 UV-Vis spectrophotometer. Luminescent spectra were recorded on an Edinburgh Instruments FLS980. Fluorescent quantum efficiencies were determined using a Hamamatsu C11347-11 Quantaaurus-QY spectrometer.

Analytical HPLC was performed on an Agilent 1260 Infinity II instrument equipped with a diode array detector and CHIRALPAK columns (4.6 mm  $\times$  250 mm, 3  $\mu$ m) from Daicel Chiral Technologies. Column temperature was maintained at 30  $^\circ$ C. The CD spectra were measured using a Circular Dichroism spectrometer (J-1500, Jasco). CPL measurements of solutions ( $c = 1.0 \times 10^{-5}$  M) and neat films were performed with circularly polarized luminescence spectrometer (CPL-300, Jasco). Samples were excited with a Xenon ozone-free lamp 150 W LS. The following parameters were used: emission slit width = 3 mm, integration time = 2 second, scan speed = 200 nm/min, accumulations = 2.

The neat films used in this study have been prepared on quartz flakes by spin coating solutions of enantiopure compounds with a concentration of  $\sim 10$  mg/mL. 0.1 mL of the solution was deposited on the quartz flakes fixed within the spin-coater holder, and the film was obtained using a sequence including 60 seconds of rotation, with an acceleration of 1000 rpm/s and a maximum speed of 3000 rpm.

DFT calculations were performed with the Gaussian 09 program. Geometry optimizations and vertical excitations were calculated by means of hybrid density functional CAM-B3LYP with the basis set of 6-31G(d). The input files and orbital representations were generated with Gaussview 5.0 (scaling radii of 75%, isovalue = 0.02). Excitation data were calculated using TD-DFT (CAM-B3LYP functional and 6-31G\* basis). The resulting structures were confirmed to be stationary points through vibrational frequency analysis.

The electronic circular dichroism (ECD) spectra were simulated via TD-DFT calculations of the lowest 30 vertical singlet electronic excitations (CAM-B3LYP functional and 6-31G\* basis). Gaussian broadening of the intensities with a parameter  $\sigma = 0.20$  eV was performed for all ECD spectra. Solvent effects on the spectra were considered by means of the polarizable continuum model<sup>[5]</sup> (PCM) for dichloromethane (DCM).

## 2. Synthetic Procedures

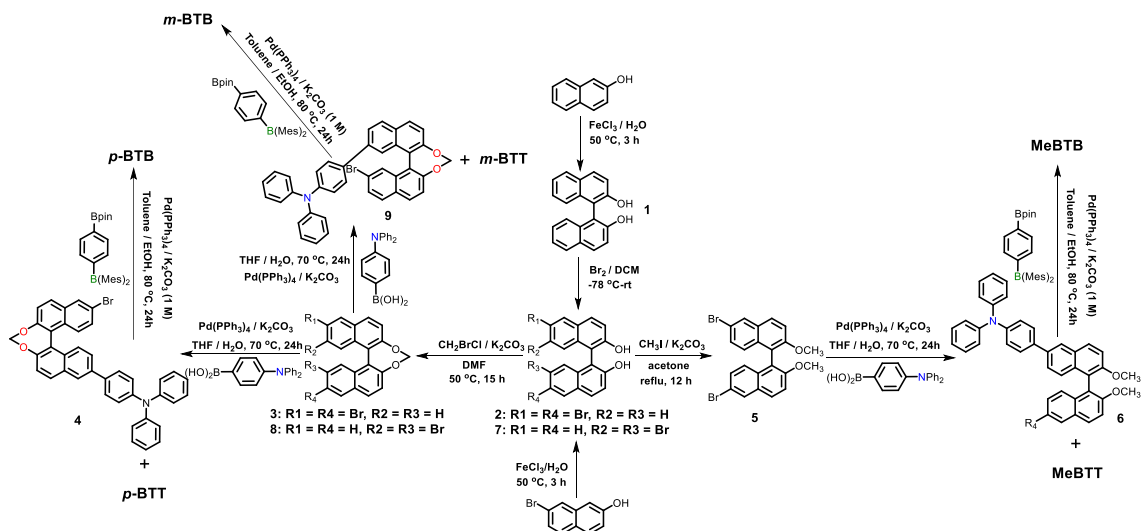

**Scheme S1.** Molecular structures and synthetic route of racemic **MeBTT**, **MeBTB**, **p-BTT**, **p-BTB**, **m-BTT** and **m-BTB**.

### 2.1 Synthesis of **4** and **p-BTT**

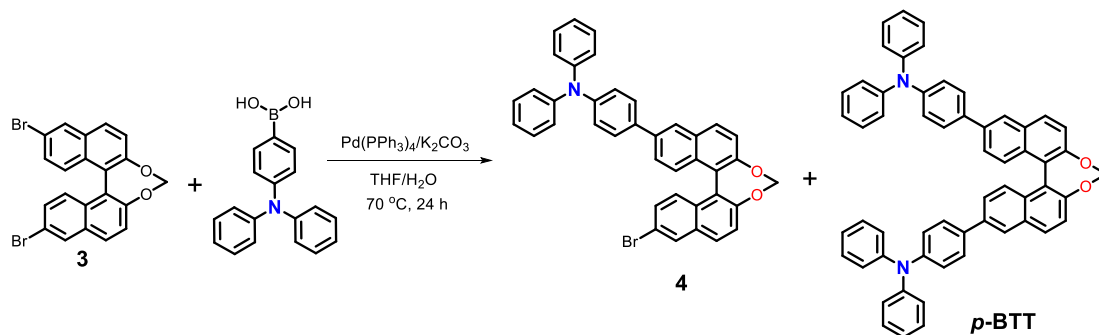

A mixture of **3** (100 mg, 0.22 mmol), (4-(diphenylamino)phenyl)boronic acid (57 mg, 0.22 mmol), K<sub>2</sub>CO<sub>3</sub> (92 mg, 0.66 mmol) and Pd(PPh<sub>3</sub>)<sub>4</sub> (10 mg, 8.8 μmol) in THF (10 mL) and deionized water (2 mL) was refluxed at 70 °C for 24 h under N<sub>2</sub>. After the mixture was cooled down, 10 mL of deionized water was added to the resulting solution and the mixture was extracted with CH<sub>2</sub>Cl<sub>2</sub> several times. The organic phase was dried over Na<sub>2</sub>SO<sub>4</sub> and was further purified by column chromatography on silica gel using CH<sub>2</sub>Cl<sub>2</sub>/petroleum ether (1/5, v/v) as eluent to give the product **4** (40 mg, yield: 29%) and **p-BTT** (30 mg, yield: 22%) as white solid. Melting point (Mp: >250 °C for **p-BTT**).

$^1\text{H}$  NMR (400 MHz,  $\text{CDCl}_3$ ) of **4**:  $\delta$  8.11 (s, 1H), 8.10 (s, 1H), 8.02 (d,  $J = 9.0$  Hz, 1H), 7.89 (d,  $J = 9.0$  Hz, 1H), 7.64–7.54 (m, 3H), 7.49 (m, 3H), 7.44 (d,  $J = 9.0$  Hz, 1H), 7.40–7.35 (m, 1H), 7.33–7.27 (m, 4H), 7.21–7.10 (m, 6H), 7.07–7.01 (m, 2H), 5.70 (s, 2H); **p-BTT**:  $\delta$  7.97 (d,  $J = 9.0$  Hz, 4H), 7.80 (s, 2H), 7.72–7.64 (m, 2H), 7.45 (d,  $J = 9.0$  Hz, 2H), 7.23–7.15 (m, 12H), 7.09–6.95 (m, 12H), 6.92 (d,  $J = 8.4$  Hz, 4H), 5.72 (s, 2H).  $^{13}\text{C}$  NMR (101 MHz,  $\text{CDCl}_3$ ) of **4**:  $\delta$  151.5, 151.2, 147.6, 147.4, 137.2, 134.3, 132.9, 132.2, 130.9, 130.7, 130.7, 130.3, 129.4, 129.3, 128.7, 127.9, 127.0, 126.4, 125.7, 125.4, 124.5, 123.9, 123.0, 122.2, 121.3, 119.1, 103.2; **p-BTT**:  $\delta$  151.7, 147.5, 147.1, 138.3, 134.8, 132.4, 130.8, 130.0, 129.2, 129.0, 127.9, 126.2, 124.6, 124.4, 124.3, 123.7, 122.9, 120.7, 103.2. ESI-HRMS ( $m/z$ ): calcd. for **4**:  $\text{C}_{39}\text{H}_{26}\text{BrNO}_2$  [ $\text{M}+\text{H}$ ] $^+$  620.1225, found 620.1213, calcd. for **p-BTT**:  $\text{C}_{57}\text{H}_{40}\text{N}_2\text{O}_2$  [ $\text{M}+\text{H}$ ] $^+$  785.3168, found 785.3127.

## 2.2 Synthesis of *p*-BTB

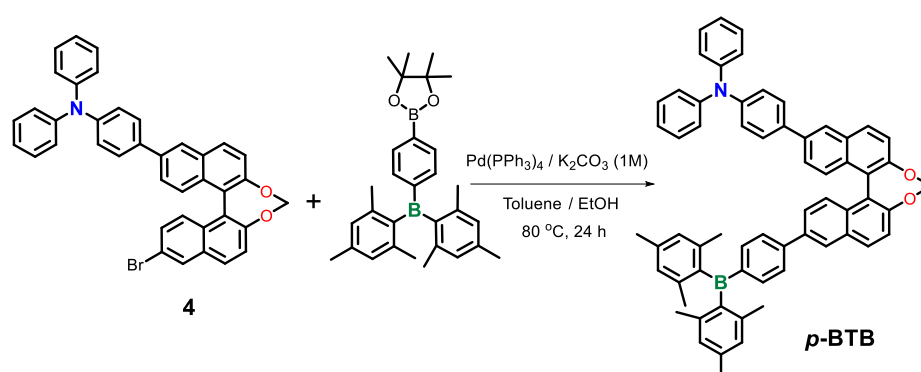

The mixture of **4** (100 mg, 0.16 mmol), 2-(4-(dimesitylboryl)phenyl)-4,4,5,5-tetramethyl-1,3,2-dioxaborolane (110 mg, 0.24 mmol),  $\text{Pd}(\text{PPh}_3)_4$  (10 mg, 9  $\mu\text{mol}$ ), toluene (6 mL), ethanol (2 mL) and 1 M  $\text{K}_2\text{CO}_3$  aqueous solution (1 mL) in a round-bottom flask was stirred at 80  $^\circ\text{C}$  under  $\text{N}_2$  atmosphere for 8 h. The mixture was then cooled to r.t. and poured into water (100 mL). After extraction with  $\text{CH}_2\text{Cl}_2$ , the organic phase was dried over  $\text{Na}_2\text{SO}_4$ . Purification by column chromatography on silica using  $\text{CH}_2\text{Cl}_2$ /petroleum ether (1:6, v/v) as eluent yielded a white solid of **p-BTB** (56 mg, yield: 40%). Melting point (Mp: 195 $^\circ\text{C}$ ).  $^1\text{H}$  NMR (400 MHz,  $\text{CDCl}_3$ )  $\delta$  8.22 (s, 1H), 8.11 (s, 1H), 8.08–7.98 (m, 2H), 7.71 (d,  $J = 7.8$  Hz, 2H), 7.68–7.55 (m, 8H), 7.54–7.46 (m, 2H), 7.36–7.25 (m, 4H), 7.20–7.10 (m, 6H), 7.08–7.00 (m, 2H), 6.84 (s, 4H), 5.72 (s, 2H), 2.32 (s, 6H), 2.05 (s, 12H).  $^{13}\text{C}$  NMR (101 MHz,  $\text{CDCl}_3$ )  $\delta$  151.6, 151.2, 147.7, 147.4, 143.8, 140.8, 138.6, 137.2, 137.1, 134.5, 132.2, 132.1, 131.6, 131.1, 130.7, 130.5, 129.3, 128.2, 127.9, 127.6, 127.4, 126.7, 126.5, 126.1, 125.9, 125.6, 125.5, 125.4, 124.5, 124.0, 123.0, 121.5, 121.3, 103.2, 23.50, 21.2.  $^{11}\text{B}$  NMR (225 MHz,  $\text{CDCl}_3$ )  $\delta$  74 ppm. ESI-HRMS ( $m/z$ ): calcd. for  $\text{C}_{63}\text{H}_{52}\text{BNO}_2$  [ $\text{M}+\text{H}$ ] $^+$  866.4169, found 866.4134.

### 2.3 Synthesis of **6** and MeBTT

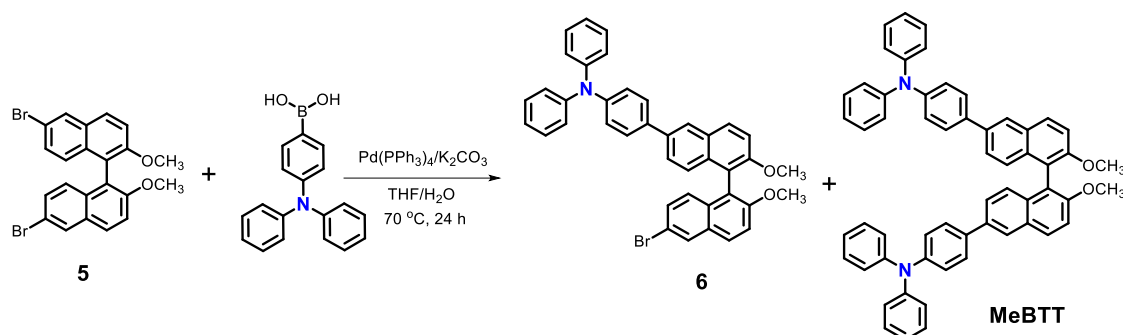

A mixture of **5** (170 mg, 0.36 mmol), (4-(diphenylamino)phenyl)boronic acid (103 mg, 0.36 mmol),  $\text{K}_2\text{CO}_3$  (148 mg, 1.08 mmol) and  $\text{Pd}(\text{PPh}_3)_4$  (21 mg, 14.4  $\mu\text{mol}$ ) in THF (10 mL) and deionized water (2 mL) was refluxed at 70 °C under  $\text{N}_2$  for 24 h. After the mixture was cooled down, 10 mL of deionized water was added to the resulting solution and the mixture was extracted with  $\text{CH}_2\text{Cl}_2$  several times. The organic phase was dried over  $\text{Na}_2\text{SO}_4$  and was further purified by column chromatography on silica gel using  $\text{CH}_2\text{Cl}_2$ /petroleum ether (1/5, v/v) as eluent to give the product **6** (60 mg, yield: 26%) and MeBTT (65 mg, yield: 29%) as white solid. Melting point (Mp: 164 °C).  $^1\text{H}$  NMR (400 MHz,  $\text{CDCl}_3$ ) of **7**:  $\delta$  8.10–7.96 (m, 3H), 7.89 (d,  $J = 9.0$  Hz, 1H), 7.54 (d,  $J = 9.0$  Hz, 2H), 7.51–7.41 (m, 3H), 7.31–7.22 (m, 6H), 7.19–7.07 (m, 6H), 7.06–6.98 (m, 3H), 3.78 (d,  $J = 2.0$  Hz, 6H); MeBTT:  $\delta$  8.14–7.94 (m, 4H), 7.62–7.52 (m, 4H), 7.52–7.41 (m, 4H), 7.31–7.22 (m, 8H), 7.19 (d,  $J = 9.0$  Hz, 2H), 7.17–7.10 (m, 12H), 7.06–6.98 (m, 4H), 3.79 (s, 6H).  $^{13}\text{C}$  NMR (101 MHz,  $\text{CDCl}_3$ ) of **7**:  $\delta$  155.2, 154.9, 147.7, 147.0, 135.8, 135.0, 132.8, 132.5, 130.2, 129.8, 129.8, 129.6, 129.5, 129.3, 128.5, 127.8, 127.2, 125.9, 125.5, 125.2, 124.4, 124.0, 122.9, 119.8, 118.7, 117.3, 115.1, 114.4, 56.8; MeBTT:  $\delta$  155.0, 147.7, 146.9, 135.7, 135.2, 133.0, 129.6, 129.5, 129.4, 127.8, 125.8, 125.8, 125.1, 124.4, 124.0, 122.8, 119.5, 114.6, 57.0 ppm. ESI-HRMS ( $m/z$ ): calcd. for **7**:  $\text{C}_{39}\text{H}_{26}\text{BrNO}_2$  [ $\text{M}+\text{H}$ ]<sup>+</sup> 636.1538, found 636.1552, calcd. for MeBTT:  $\text{C}_{58}\text{H}_{44}\text{N}_2\text{O}_2$  [ $\text{M}+\text{H}$ ]<sup>+</sup> 801.3481, found 801.3497.

### 2.4 Synthesis of MeBTB

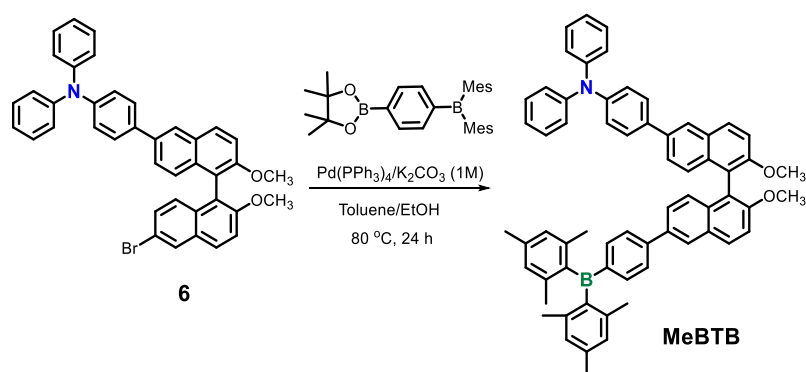

The mixture of **6** (100 mg, 0.16 mmol), 2-(4-(dimesitylboryl)phenyl)-4,4,5,5-tetramethyl-1,3,2-dioxaborolane (0.11 g, 0.24 mmol),  $\text{Pd}(\text{PPh}_3)_4$  (15 mg, 9  $\mu\text{mol}$ ), toluene (6 mL), ethanol (2 mL) and 1 M  $\text{K}_2\text{CO}_3$  aqueous solution (1 mL) in a round-

bottom flask was stirred at 80 °C under N<sub>2</sub> atmosphere for 8 h. The mixture was then cooled to r.t. and poured into water (100 mL). After extraction with CH<sub>2</sub>Cl<sub>2</sub>, the organic phase was dried over Na<sub>2</sub>SO<sub>4</sub>. Purification by column chromatography on silica using CH<sub>2</sub>Cl<sub>2</sub>/petroleum ether (1:6, v/v) as eluent yielded a white solid of **MeBTB** (60 mg, yield: 43%). Melting point (Mp: 182 °C). <sup>1</sup>H NMR (400 MHz, CDCl<sub>3</sub>) δ 8.15 (d, *J* = 2.0 Hz, 1H), 8.09–7.96 (m, 3H), 7.66 (d, *J* = 8.0 Hz, 2H), 7.58 (d, *J* = 8.0 Hz, 2H), 7.57–7.52 (m, 3H), 7.50–7.41 (m, 3H), 7.30–7.22 (m, 5H), 7.20 (d, *J* = 9.0 Hz, 1H), 7.18–7.09 (m, 6H), 7.06–6.98 (m, 2H), 6.83 (s, 4H), 3.79 (d, *J* = 6.0 Hz, 6H), 2.31 (s, 6H), 2.04 (s, 12H). <sup>13</sup>C NMR (101 MHz, CDCl<sub>3</sub>) δ 155.3, 155.0, 147.7, 146.9, 144.4, 141.8, 140.8, 140.1, 138.5, 137.1, 135.7, 135.6, 135.1, 133.5, 133.0, 129.9, 129.7, 129.5, 129.4, 129.3, 128.1, 127.8, 126.5, 126.2, 125.9, 125.9, 125.7, 125.2, 124.4, 124.0, 122.9, 119.4, 119.3, 114.6, 56.9, 23.5, 21.2. <sup>11</sup>B NMR (225 MHz, CDCl<sub>3</sub>) δ 74 ppm. ESI-HRMS (*m/z*): calcd. for C<sub>63</sub>H<sub>52</sub>BNO<sub>2</sub> [*M*+*H*]<sup>+</sup> 882.4482, found 882.4505.

## 2.5 Synthesis of **8**

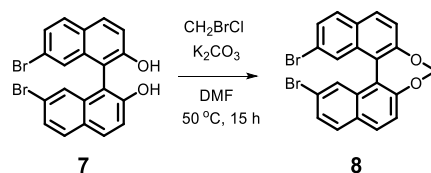

A mixture of **7** (100 mg, 0.23 mmol), CH<sub>2</sub>BrCl (0.44 mL, 6.90 mmol), and K<sub>2</sub>CO<sub>3</sub> (311 mg, 2.25 mmol) in dry DMF (3 mL) was stirred at 50 °C for 15 h under N<sub>2</sub> atmosphere. The reaction mixture was poured into water and EtOAc. The aqueous layer was extracted with EtOAc. The organic layers were combined and washed with water three times. After dried over Na<sub>2</sub>SO<sub>4</sub>, the solvent was evaporated under vacuo to give a residue. The residue was purified by column chromatography to afford **8** (82 mg, yield: 80%) as a white solid powder. <sup>1</sup>H NMR (400 MHz, CDCl<sub>3</sub>) δ 7.96 (d, *J* = 9.0 Hz, 2H), 7.81 (d, *J* = 9.0 Hz, 2H), 7.64 (d, *J* = 2.0 Hz, 2H), 7.55 (dd, *J* = 9.0, 2.0 Hz, 2H), 7.48 (d, *J* = 9.0 Hz, 2H), 5.68 (s, 2H). <sup>13</sup>C NMR (101 MHz, CDCl<sub>3</sub>) δ 152.1, 133.0, 130.6, 130.3, 130.1, 128.7, 128.5, 124.8, 121.4, 121.1. GC-MS (*m/z*): calcd. for C<sub>21</sub>H<sub>12</sub>Br<sub>2</sub>O<sub>2</sub> [*M*<sup>+</sup>] 455.9, found 456.0.

## 2.6 Synthesis of **9** and *m*-BTT

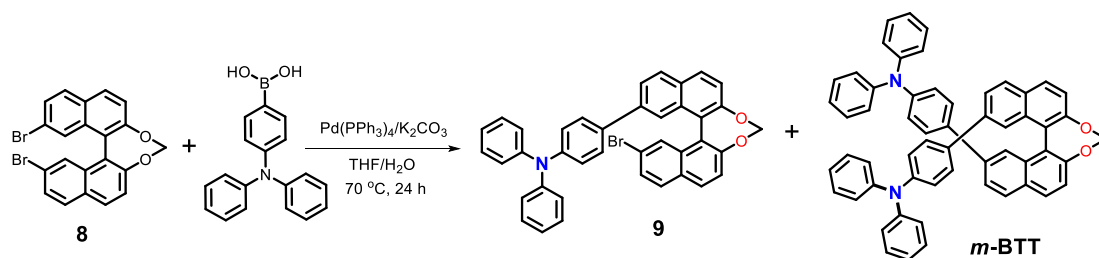

A mixture of **8** (100 mg, 0.22 mmol), 4-(diphenylamino)phenylboronic acid (64 mg, 0.33 mmol), K<sub>2</sub>CO<sub>3</sub> (91 mg, 0.66 mmol) and Pd(PPh<sub>3</sub>)<sub>4</sub> (10 mg, 8.8 μmol) in THF (10 mL) and deionized water (2 mL) was refluxed at 70 °C under N<sub>2</sub> for 24 h. After the

mixture was cooled down, 10 mL of deionized water was added to the resulting solution and the mixture was extracted with CH<sub>2</sub>Cl<sub>2</sub> several times. The organic phase was dried over Na<sub>2</sub>SO<sub>4</sub> and was further purified by column chromatography on silica gel using CH<sub>2</sub>Cl<sub>2</sub>/petroleum ether (1/8, v/v) as eluent to give the product **9** (40 mg, yield: 29%) and *m*-**BTT** (35 mg, yield: 26%) as white solid. Melting point (Mp: 232 °C for *m*-**BTT**). <sup>1</sup>H NMR (400 MHz, acetone-d<sub>6</sub>) of **7**: δ 8.20–8.10 (m, 3H), 8.02 (d, *J* = 9.0 Hz, 1H), 7.86–7.75 (m, 2H), 7.68–7.51 (m, 4H), 7.41–7.33 (m, 2H), 7.33–7.23 (m, 4H), 7.09–7.01 (m, 6H), 7.00–6.91 (m, 2H), 5.76 (s, 2H); *m*-**BTT**: <sup>1</sup>H NMR (101 MHz, CDCl<sub>3</sub>) δ 7.97 (d, *J* = 9.0 Hz, 4H), 7.80 (s, 2H), 7.68 (m, 2H), 7.45 (d, *J* = 9.0 Hz, 2H), 7.24–7.15 (m, 12H), 7.09–6.95 (m, 12H), 6.92 (d, *J* = 8.0 Hz, 4H), 5.72 (s, 2H). <sup>13</sup>C NMR (101 MHz, acetone-d<sub>6</sub>) of **7**: δ 147.6, 147.5, 138.7, 134.5, 133.1, 132.0, 130.9, 130.9, 130.7, 130.4, 129.4, 129.4, 128.6, 128.2, 128.0, 125.3, 125.2, 124.6, 124.6, 123.3, 123.2, 123.2, 122.0, 120.9, 120.3, 103.3; *m*-**BTT**: <sup>13</sup>C NMR (101 MHz, CDCl<sub>3</sub>) δ 151.7, 147.5, 147.1, 138.3, 134.8, 132.4, 130.8, 130.0, 129.2, 129.0, 127.9, 126.2, 124.6, 124.4, 124.3, 123.7, 122.9, 120.7, 103.2 ppm. ESI-HRMS (*m/z*): calcd. for **7**: C<sub>39</sub>H<sub>26</sub>BrNO<sub>2</sub> [M+H]<sup>+</sup> 620.1225, found 620.1226, calcd. for *m*-**BTT**: C<sub>57</sub>H<sub>40</sub>N<sub>2</sub>O<sub>2</sub> [M+H]<sup>+</sup> 785.3168, found 785.3157.

## 2.7 Synthesis of *m*-BTB

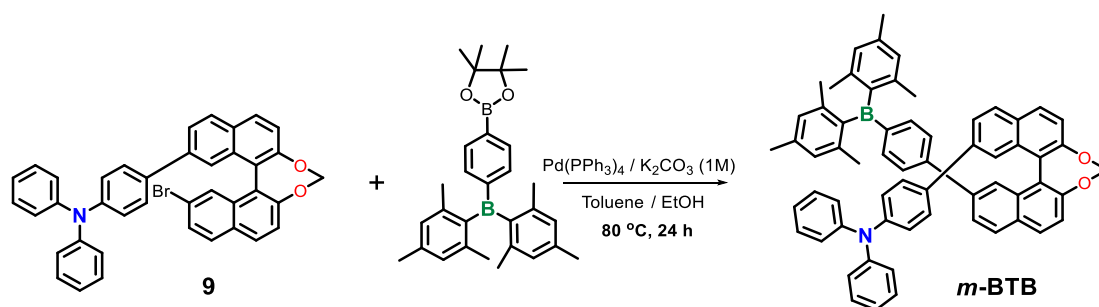

The mixture of **9** (100 mg, 0.16 mmol), 2-(4-(dimesitylboryl)phenyl)-4,4,5,5-tetramethyl-1,3,2-dioxaborolane (110 mg, 0.24 mmol), Pd(PPh<sub>3</sub>)<sub>4</sub> (10 mg, 9 μmol), toluene (6 mL), ethanol (2 mL) and 1 M K<sub>2</sub>CO<sub>3</sub> aqueous solution (1 mL) in a round-bottom flask was stirred at 80 °C under N<sub>2</sub> atmosphere for 8 h. The mixture was then cooled to r.t. and poured into water (100 mL). After extraction with CH<sub>2</sub>Cl<sub>2</sub>, the organic phase was dried over Na<sub>2</sub>SO<sub>4</sub>. Purification by column chromatography on silica using CH<sub>2</sub>Cl<sub>2</sub>/petroleum ether (1:4, v/v) as eluent yielded a white solid of *m*-**BTB** (57 mg, yield: 40%). Melting point (Mp: 202 °C). <sup>1</sup>H NMR (400 MHz, CDCl<sub>3</sub>) δ 8.04–7.95 (m, 4H), 7.92 (s, 1H), 7.82–7.73 (m, 2H), 7.72–7.64 (m, 1H), 7.46 (dd, *J* = 13.0, 9.0 Hz, 2H), 7.38 (d, *J* = 8.0 Hz, 2H), 7.31 (d, *J* = 8.0 Hz, 2H), 7.23–7.11 (m, 6H), 7.06–6.94 (m, 6H), 6.90 (d, *J* = 8.0 Hz, 2H), 6.77 (s, 4H), 5.72 (s, 2H), 2.28 (s, 6H), 1.93 (s, 12H). <sup>13</sup>C NMR (101 MHz, CDCl<sub>3</sub>) δ 151.8, 151.8, 147.6, 147.1, 144.1, 141.6, 140.8, 138.6, 138.4, 138.2, 136.9, 134.8, 132.4, 132.3, 131.3, 130.8, 130.1, 130.0, 129.2, 129.0, 128.1, 128.0, 126.7, 126.5, 126.1, 125.4, 124.8, 124.71, 124.4, 124.2, 123.6, 122.9, 121.3, 120.7, 103.2, 23.4, 21.2. <sup>11</sup>B NMR (225 MHz, CDCl<sub>3</sub>) δ 73 ppm. ESI-HRMS (*m/z*): calcd. for C<sub>63</sub>H<sub>52</sub>BNO<sub>2</sub> [M+H]<sup>+</sup> 866.4169, found 866.4143.

## Reference:

- [1] N. Lv, M. Xie, W. Gu, H. Ruan, S. Qiu, C. Zhou and Z. Cui, *Org. Lett.*, 2013, **15**, 2382.
- [2] (a) J.-W. Park, M. D. Ediger and M. M. Green, *J. Am. Chem. Soc.*, 2001, **123**, 49; (b) K. Takaishi, S. Hinoide, T. Matsumoto and T. Ema, *J. Am. Chem. Soc.*, 2019, **141**, 11852.
- [3] J.-K. Ou-Yang, Y.-Y. Zhang, M.-L. He, J.-Tao Li, X. Li, X.-L. Zhao, C.-H. Wang, Y. Yu, D.-X. Wang, L. Xu and H.-B. Yang, *Org. Lett.*, 2014, **16**, 664.
- [4] (a) C. Lee, W. Yang, R. G. Parr, *Phys. Rev. B*, 1988, **37**, 785; (b) A. D. Becke, *J. Chem. Phys.* 1993, **98**, 1372; (c) A. D. Becke, *J. Chem. Phys.* 1993, **98**, 5648.
- [5] G. Scalmani and M. J. Frisch, *J. Chem. Phys.* 2010, **132**, 114110.

## 3. Characterization by NMR Spectroscopy

### 3.1 NMR Spectra of 4

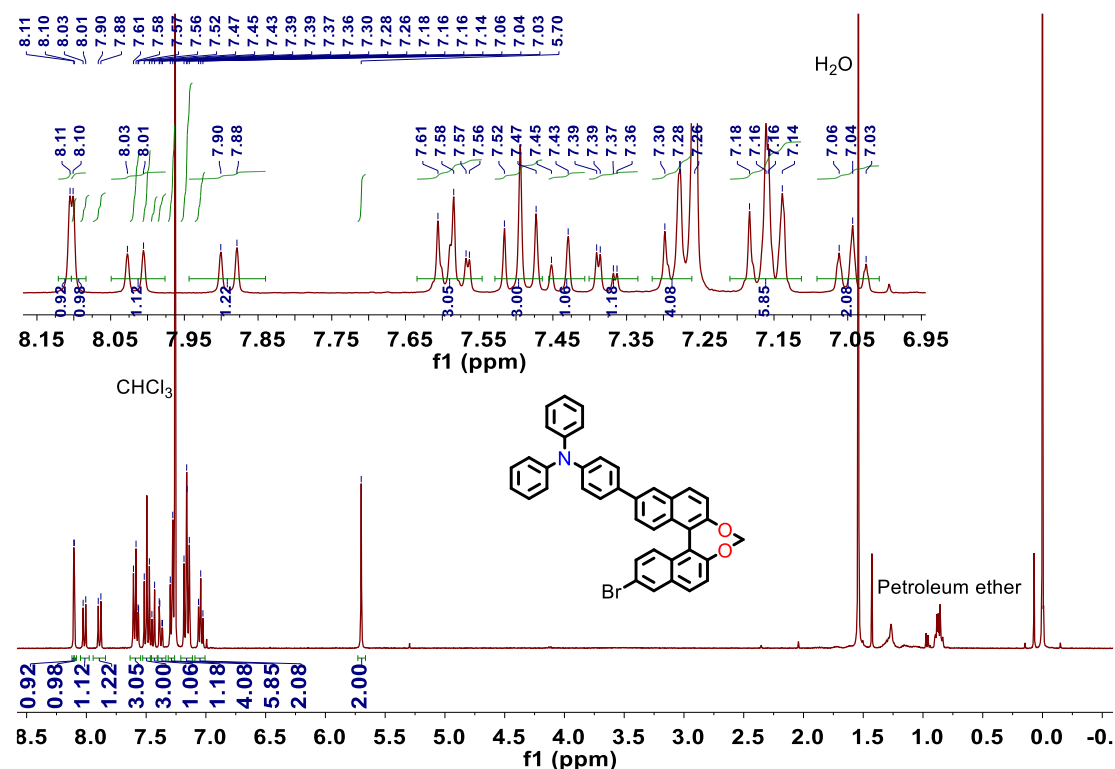

Figure S1. <sup>1</sup>H NMR (400 MHz, CDCl<sub>3</sub>) spectrum of 4.



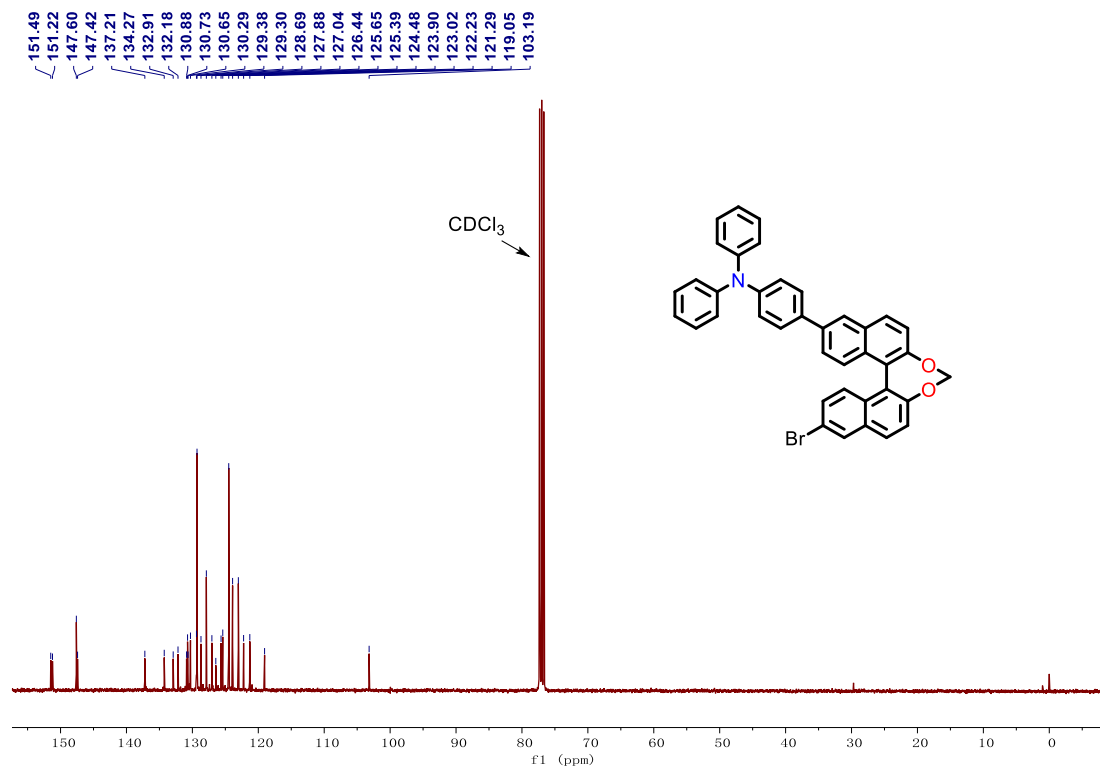

Figure S2.  $^{13}\text{C}$  NMR (101 MHz,  $\text{CDCl}_3$ ) spectrum of 4.

### 3.2 NMR Spectra of *p*-BTT.

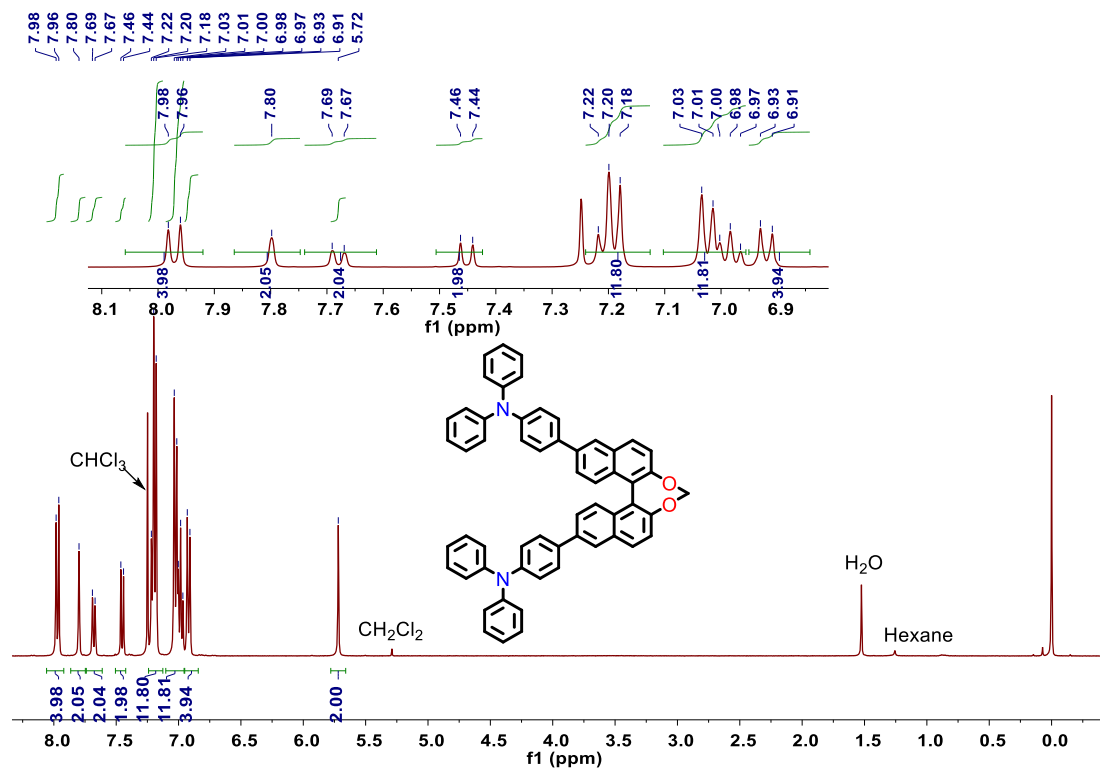

Figure S3.  $^1\text{H}$  NMR (400 MHz,  $\text{CDCl}_3$ ) spectrum of *p*-BTT.

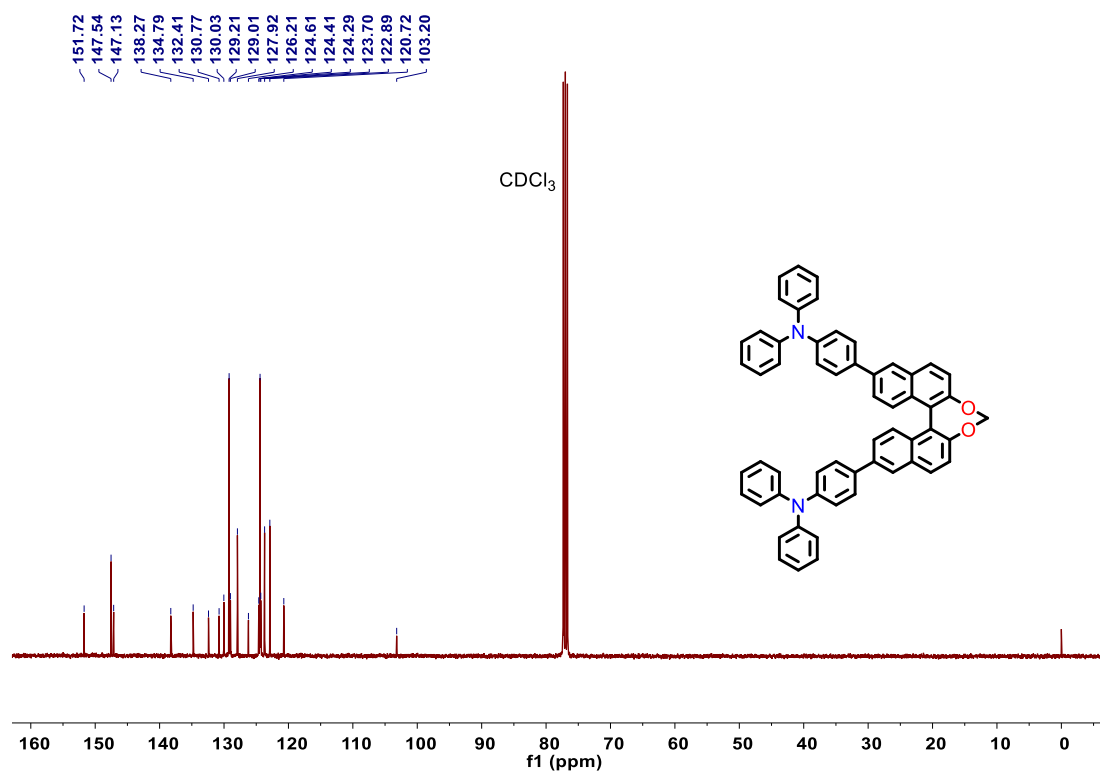

Figure S4.  $^{13}\text{C}$  NMR (101 MHz,  $\text{CDCl}_3$ ) spectrum of *p*-BTT.

### 3.3 NMR Spectra of *p*-BTB.

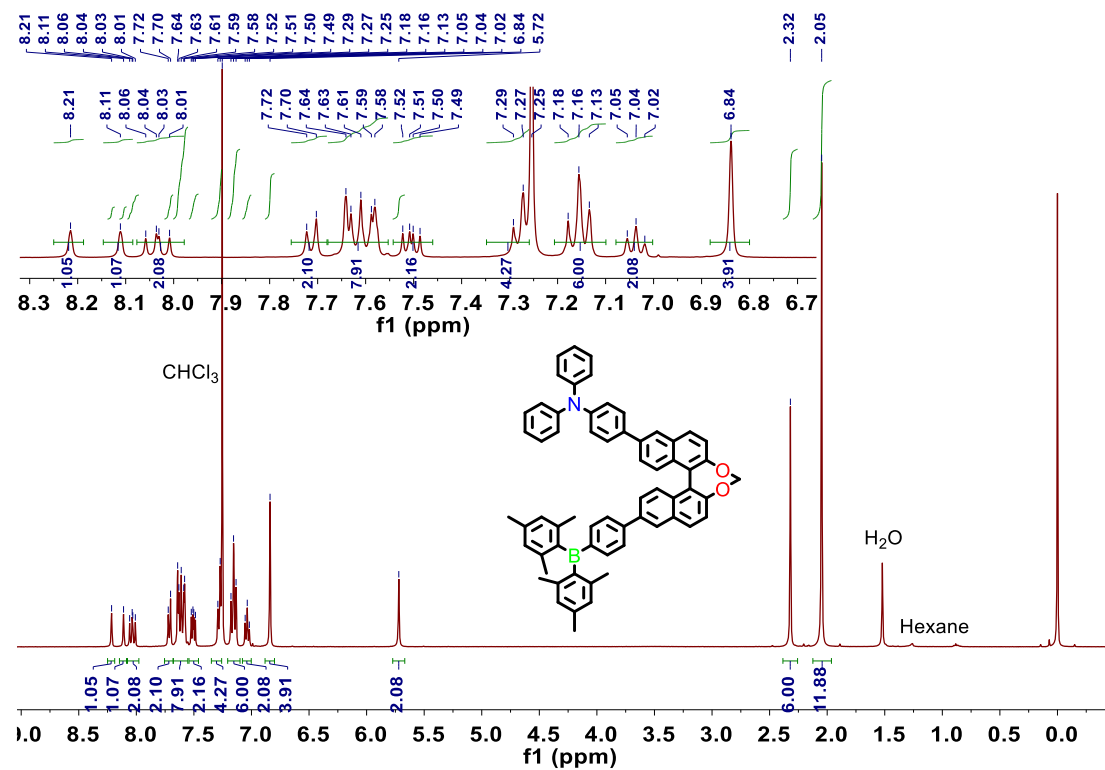

Figure S5.  $^1\text{H}$  NMR (400 MHz,  $\text{CDCl}_3$ ) spectrum of *p*-BTB.

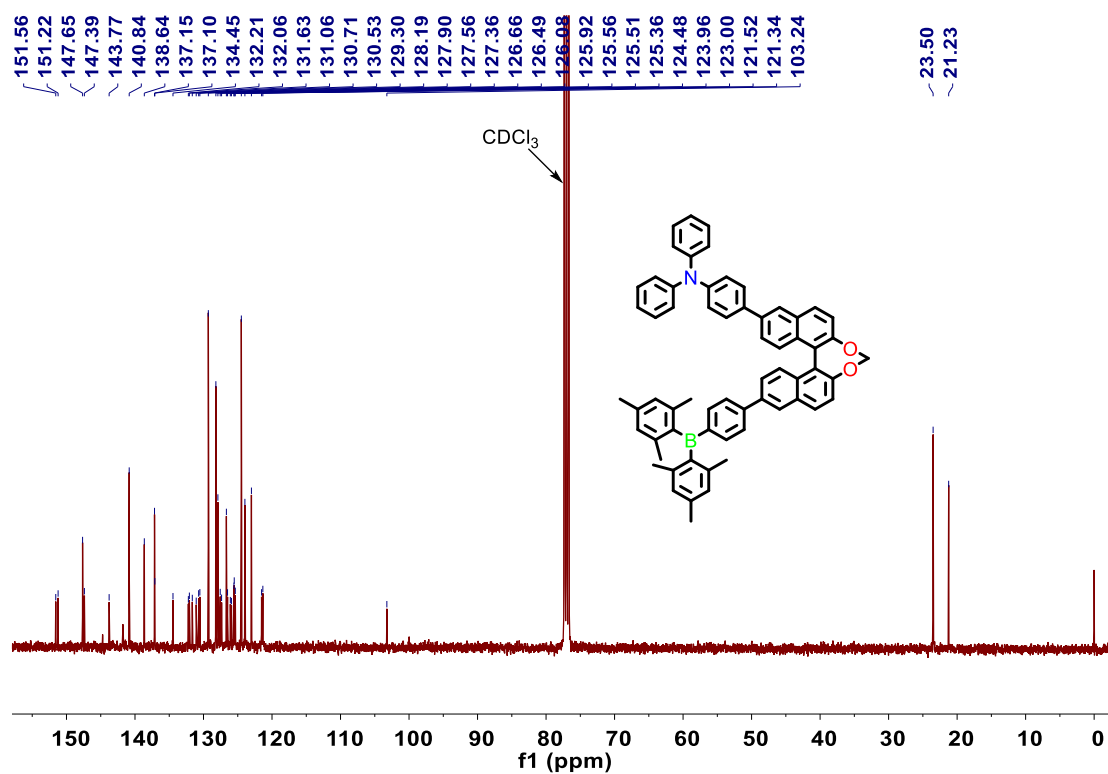

Figure S6. <sup>13</sup>C NMR (101 MHz, CDCl<sub>3</sub>) spectrum of *p*-BTB.

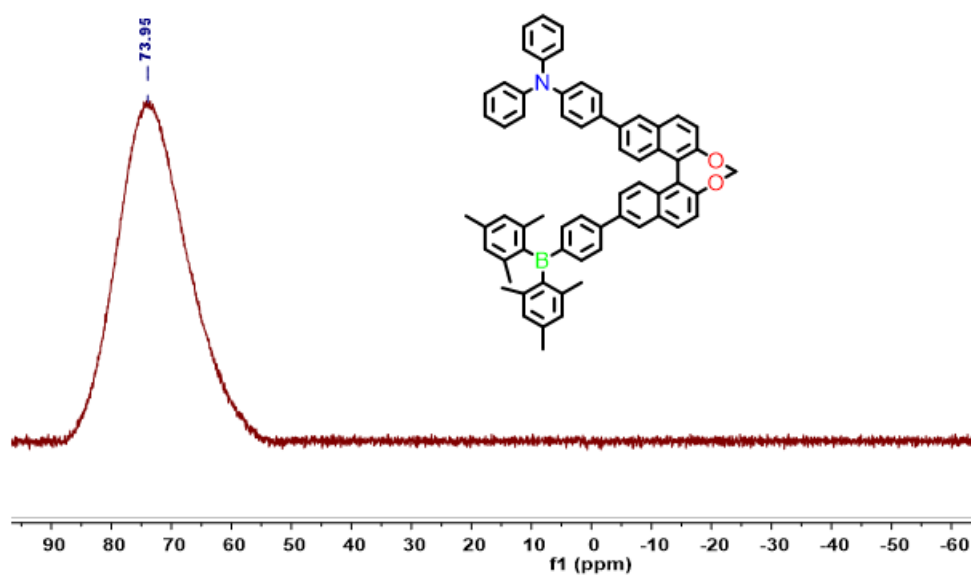

Figure S7. <sup>11</sup>B NMR (225 MHz, C<sub>6</sub>D<sub>6</sub>) spectrum of *p*-BTB.

### 3.4 NMR Spectra of 7

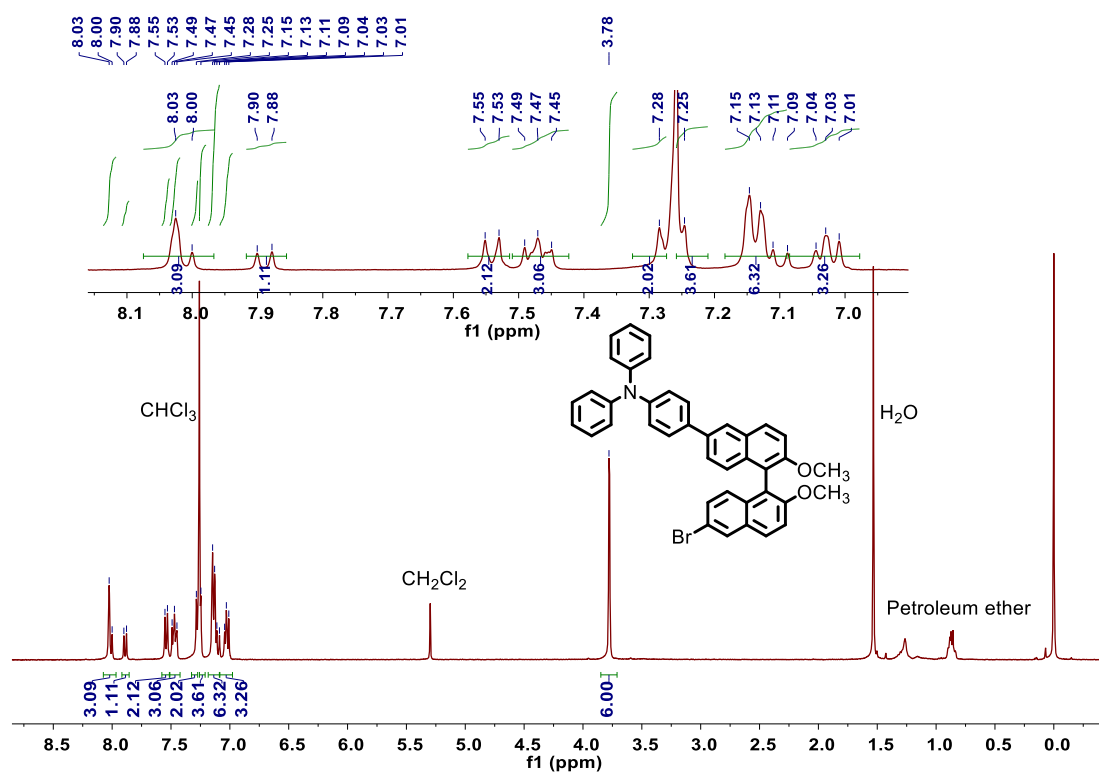

**Figure S8.**  $^1\text{H}$  NMR (400 MHz,  $\text{CDCl}_3$ ) spectrum of **7**.

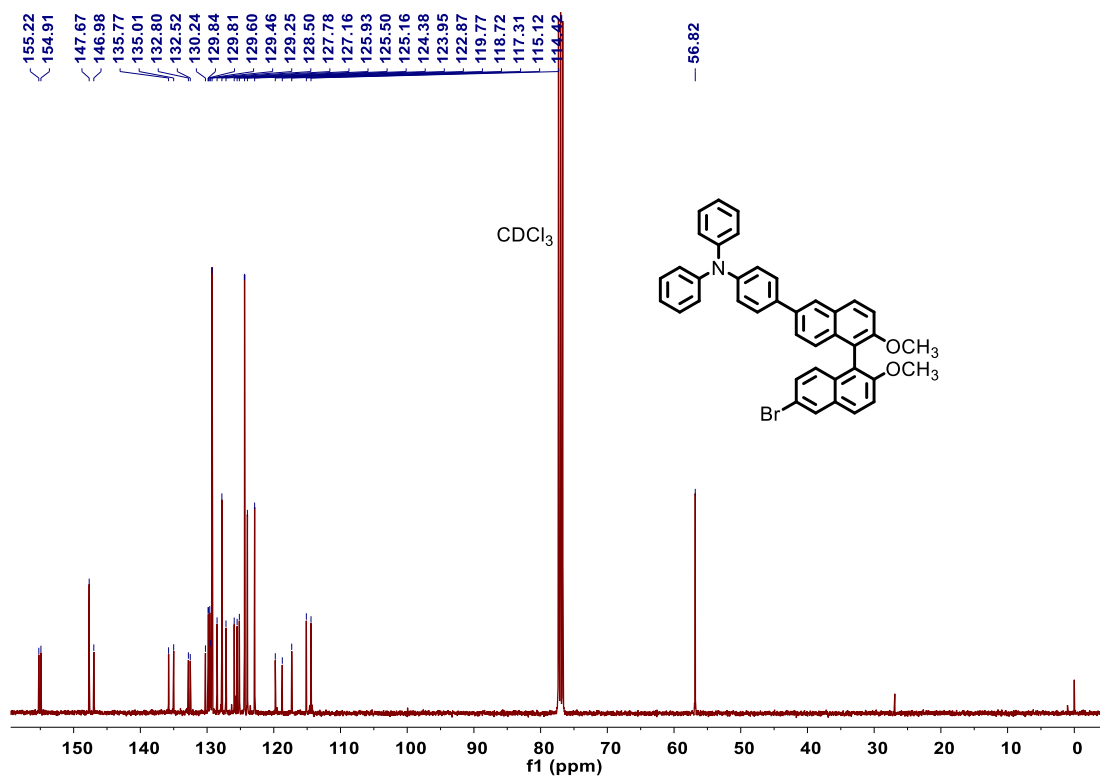

**Figure S9.**  $^{13}\text{C}$  NMR (101 MHz,  $\text{CDCl}_3$ ) spectrum of **7**.

### 3.5 NMR Spectra of MeBTT

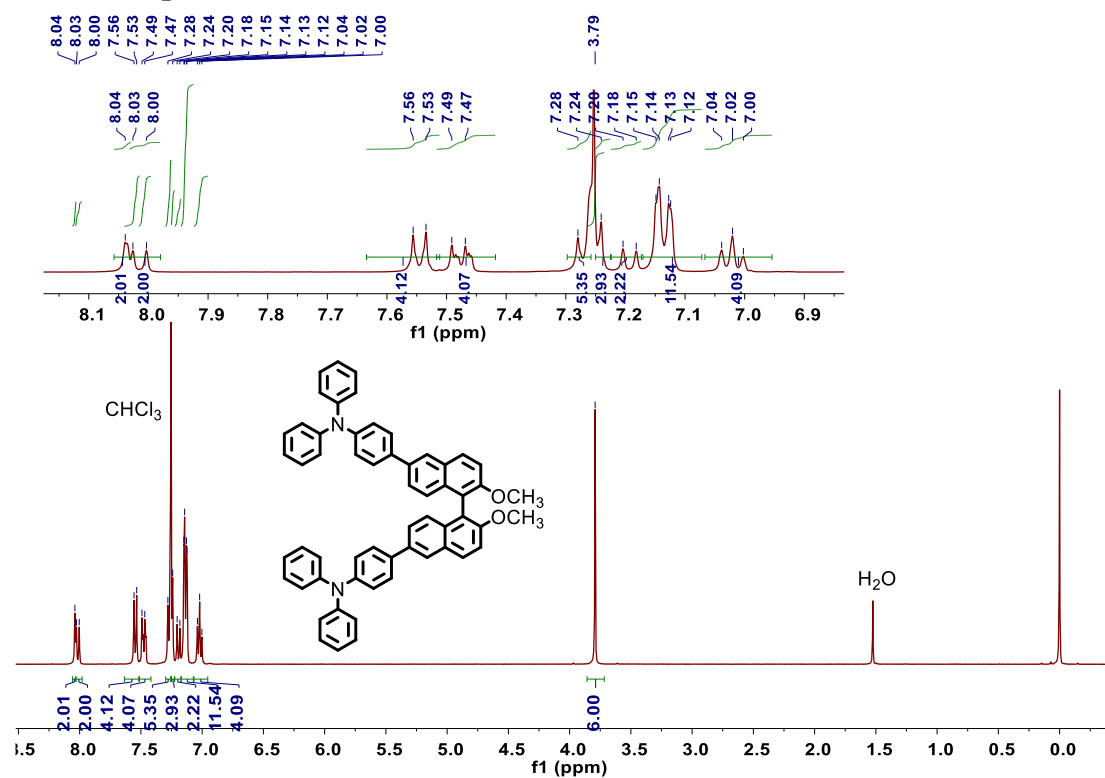

Figure S10. <sup>1</sup>H NMR (400 MHz, CDCl<sub>3</sub>) spectrum of MeBTT.

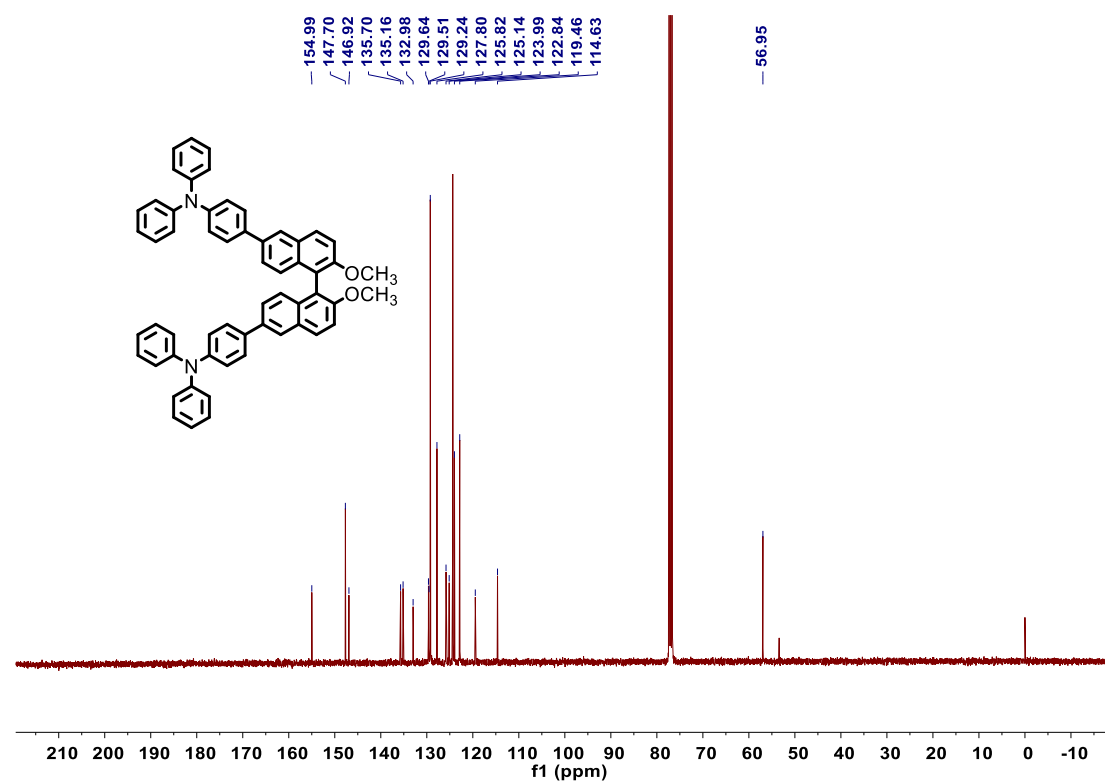

Figure S11. <sup>13</sup>C NMR (101 MHz, CDCl<sub>3</sub>) spectrum of MeBTT.

### 3.6 NMR Spectra of MeBTB

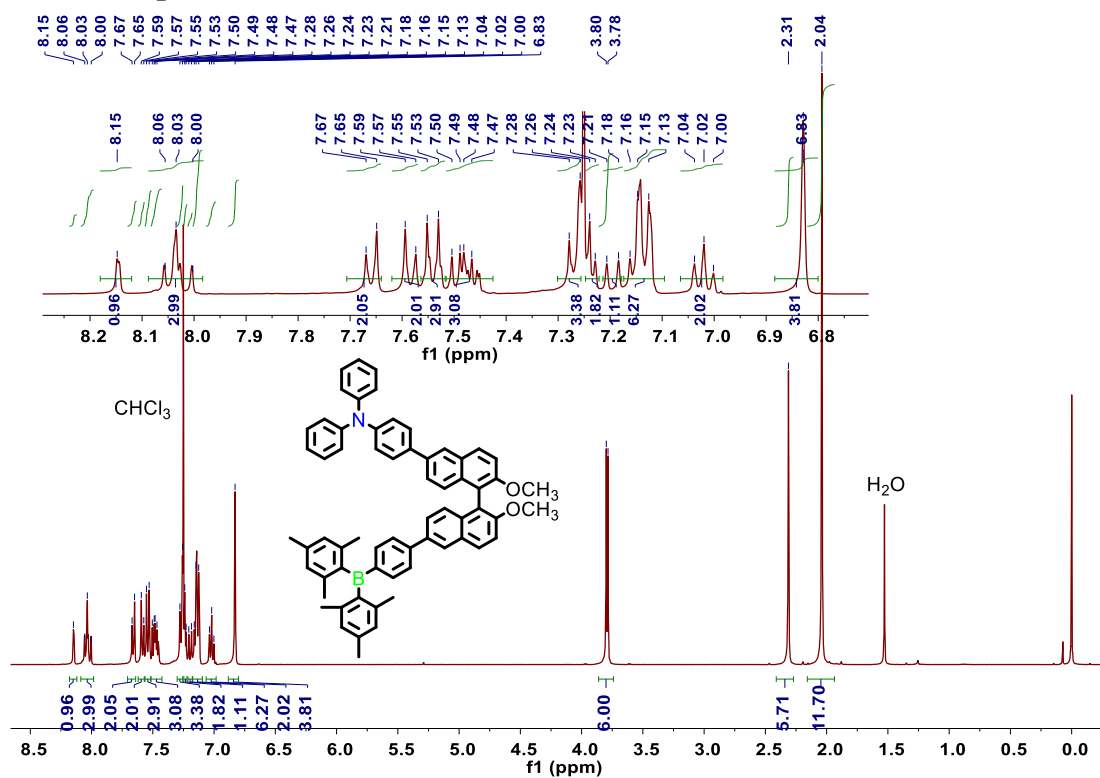

Figure S12. <sup>1</sup>H NMR (400 MHz, CDCl<sub>3</sub>) spectrum of MeBTB.

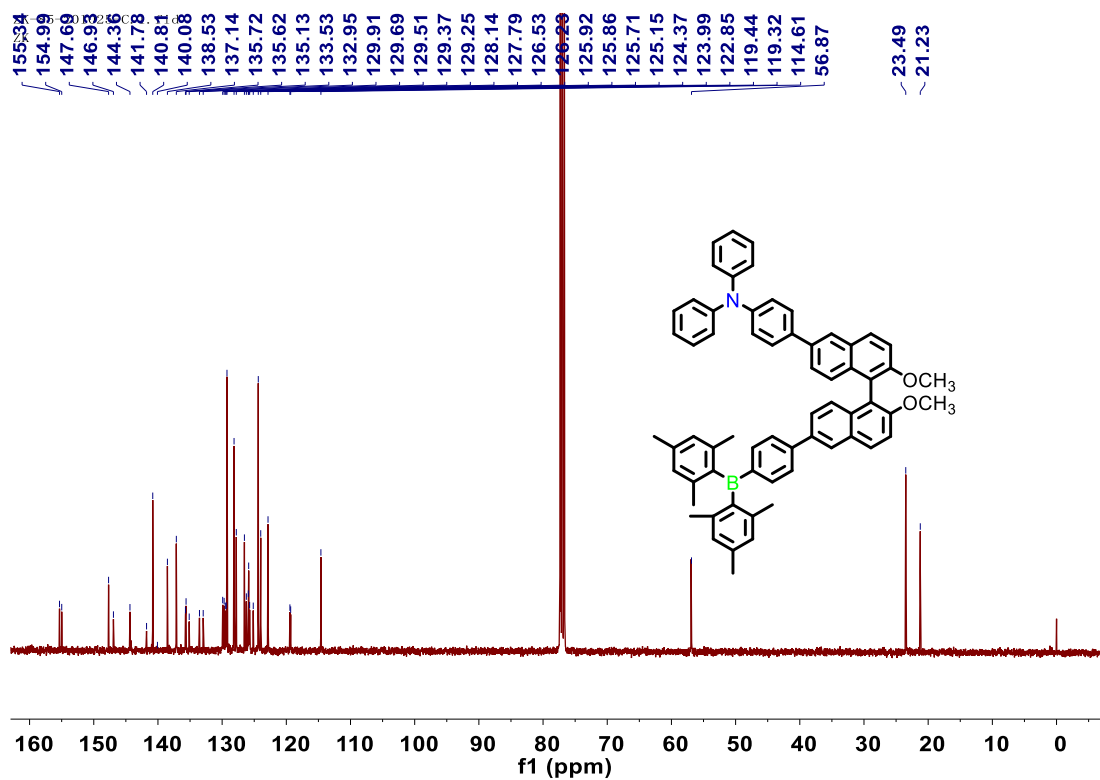

Figure S13. <sup>13</sup>C NMR (101 MHz, CDCl<sub>3</sub>) spectrum of MeBTB.

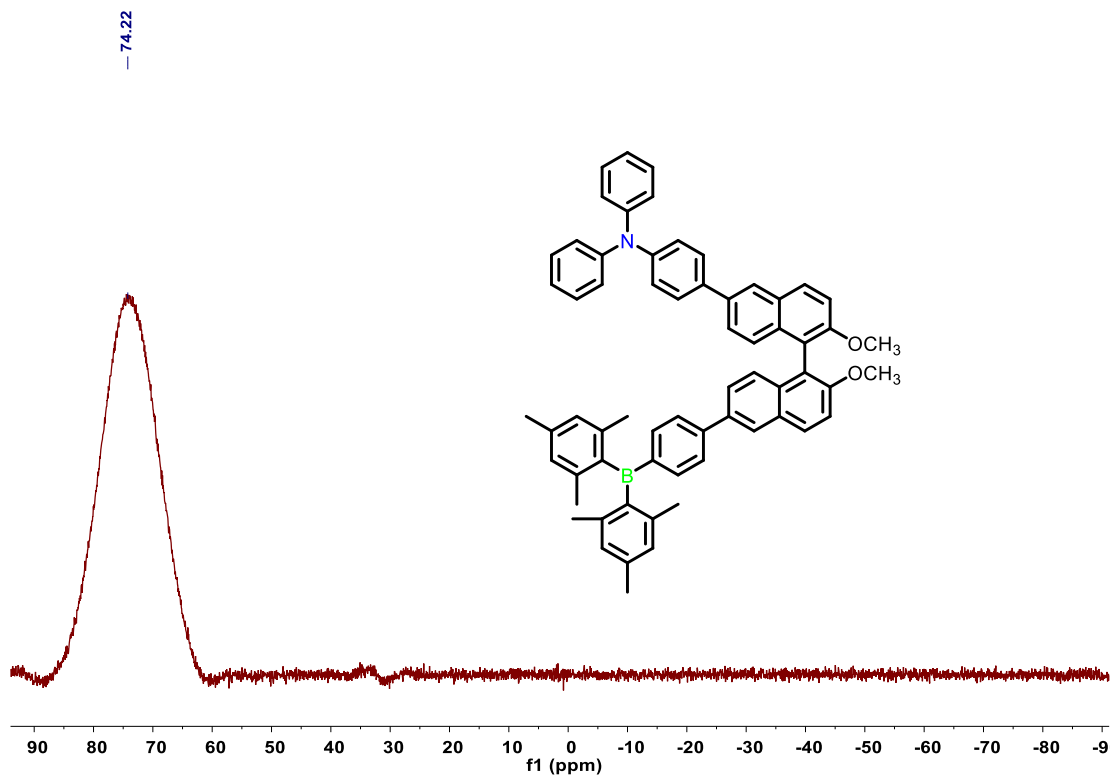

**Figure S14.**  $^{11}\text{B}$  NMR (225 MHz,  $\text{C}_6\text{D}_6$ ) spectrum of MeBTB.

### 3.7 NMR Spectra of 8.

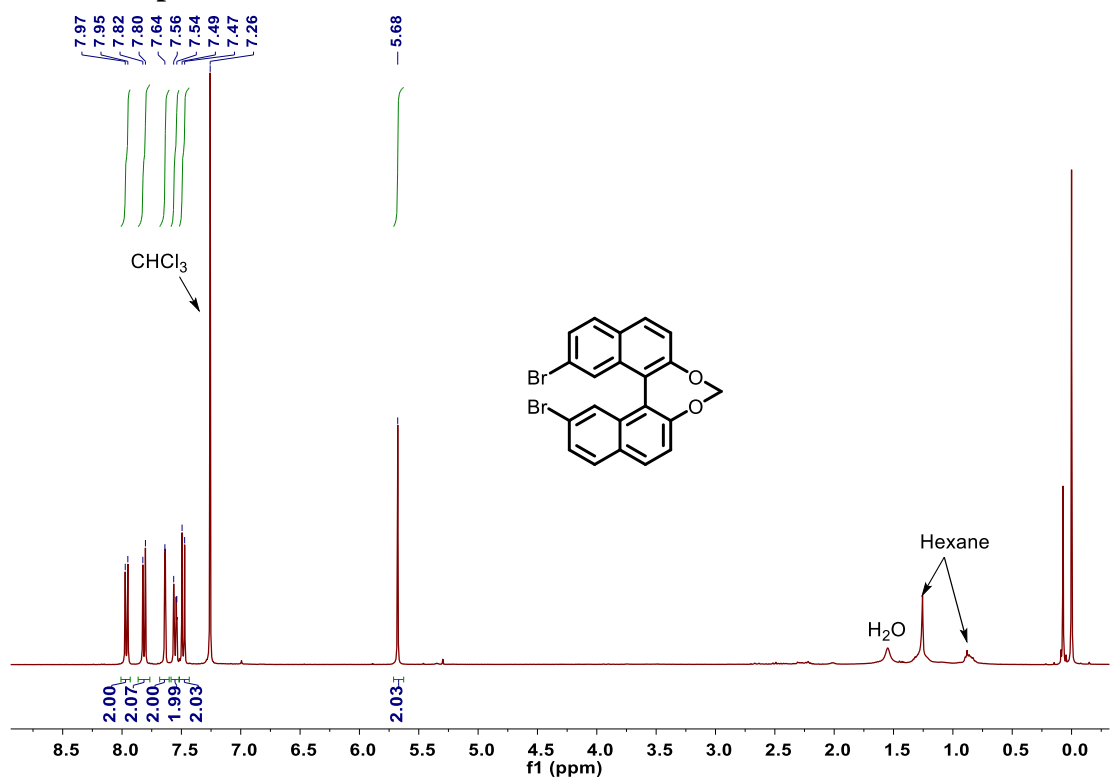

**Figure S15.**  $^1\text{H}$  NMR (400 MHz,  $\text{CDCl}_3$ ) spectrum of 8.

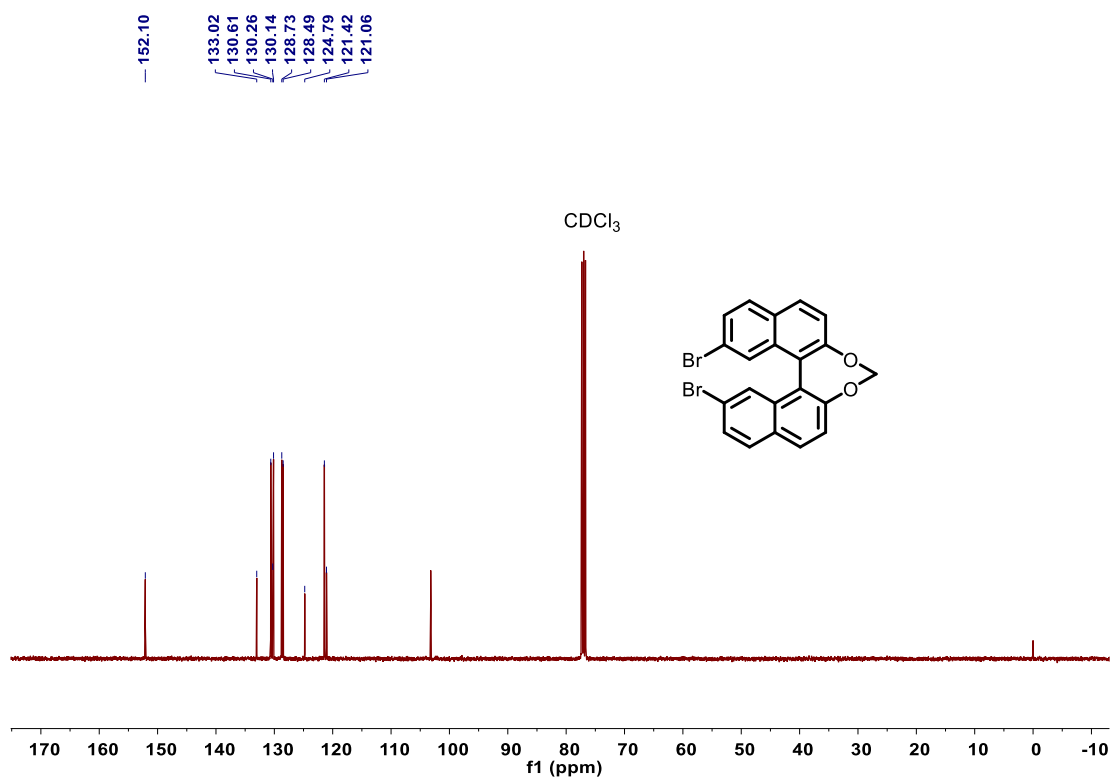

**Figure S16.** <sup>13</sup>C NMR (101 MHz, CDCl<sub>3</sub>) spectrum of **8**.

### 3.8 NMR Spectra of **9**

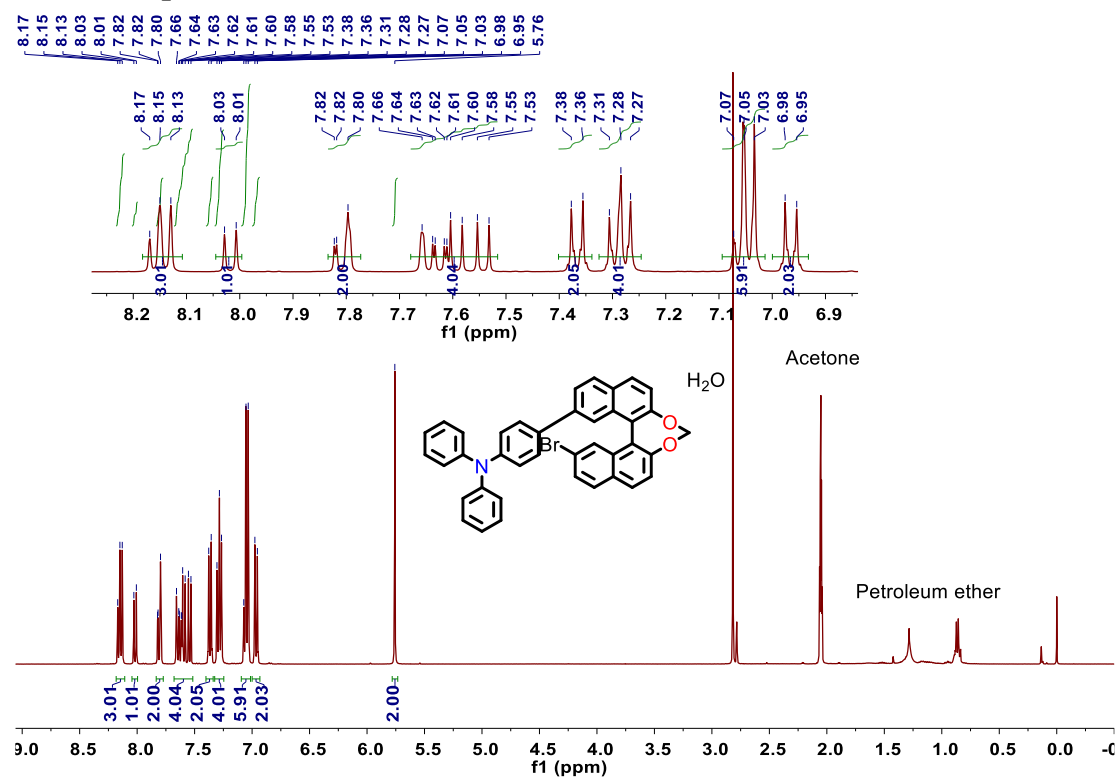

**Figure S17.** <sup>1</sup>H NMR (400 MHz, Acetone-d<sub>6</sub>) spectrum of **9**.



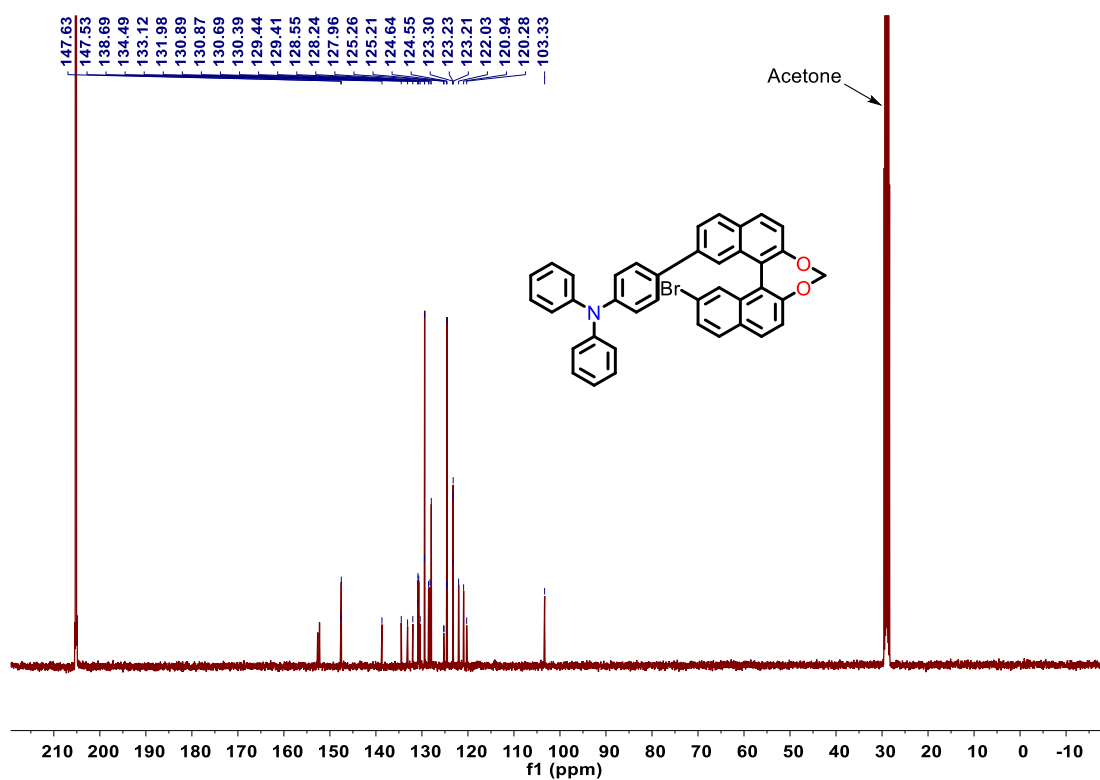

Figure S18. <sup>13</sup>C NMR (101 MHz, Acetone-d<sub>6</sub>) spectrum of 9.

### 3.9 NMR Spectra of *m*-BTT.

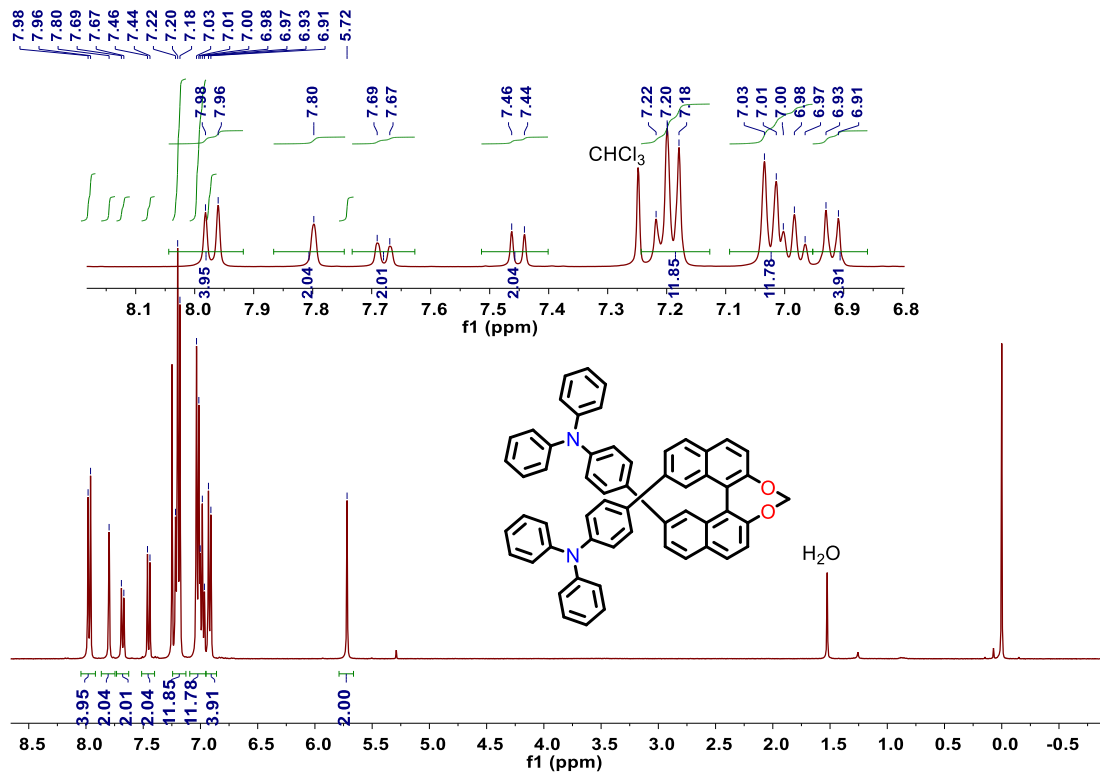

Figure S19. <sup>1</sup>H NMR (400 MHz, CDCl<sub>3</sub>) spectrum of *m*-BTT.

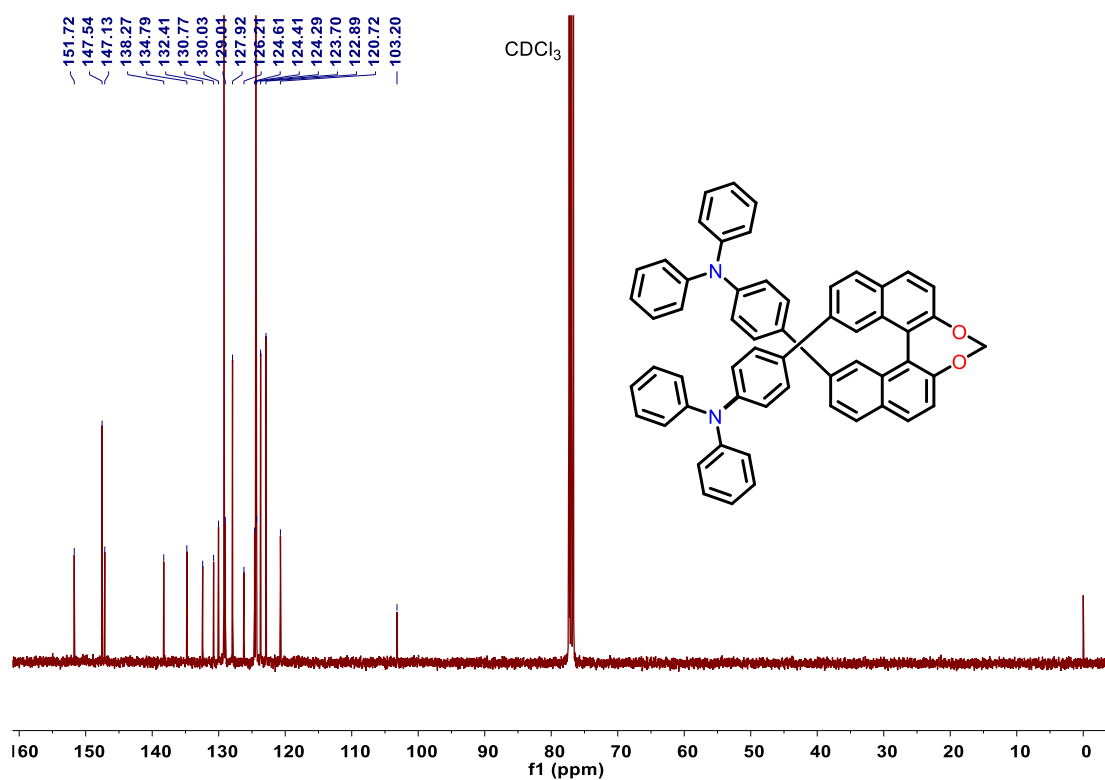

Figure S20.  $^{13}\text{C}$  NMR (101 MHz,  $\text{CDCl}_3$ ) spectrum of *m*-BTT.

### 3.10 NMR Spectra of *m*-BTB

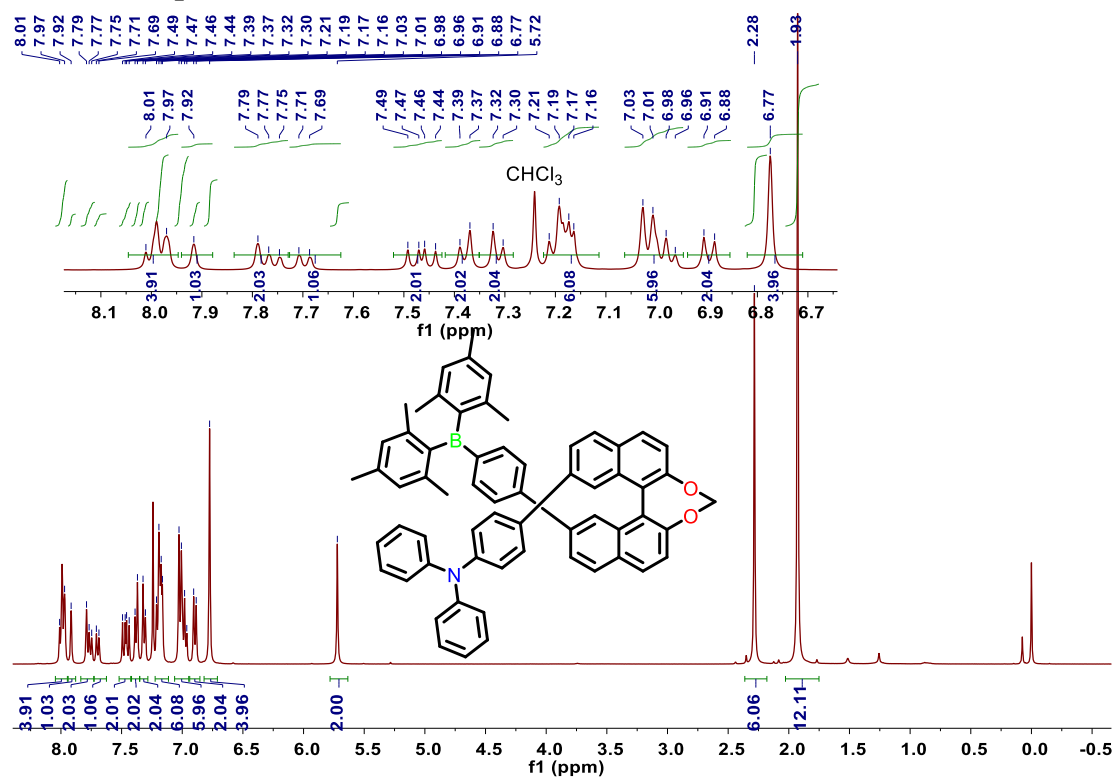

Figure S21.  $^1\text{H}$  NMR (400 MHz,  $\text{CDCl}_3$ ) spectrum of *m*-BTB.

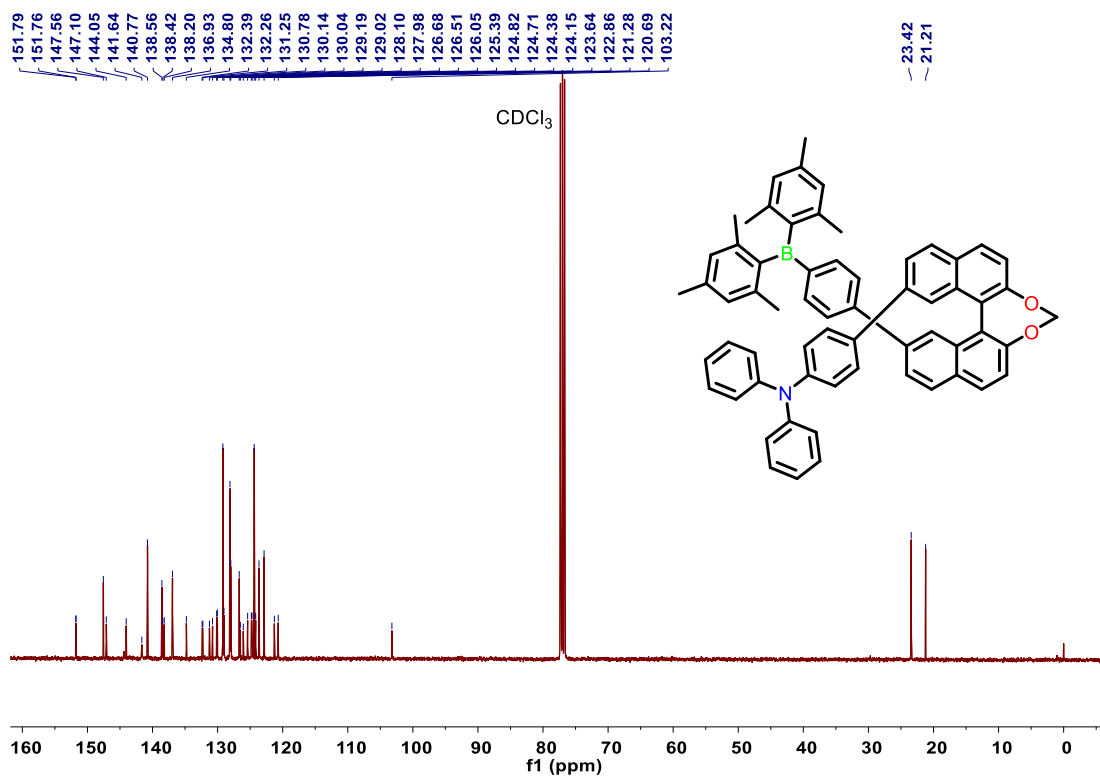

Figure S22. <sup>13</sup>C NMR (101 MHz, CDCl<sub>3</sub>) spectrum of *m*-BTB.

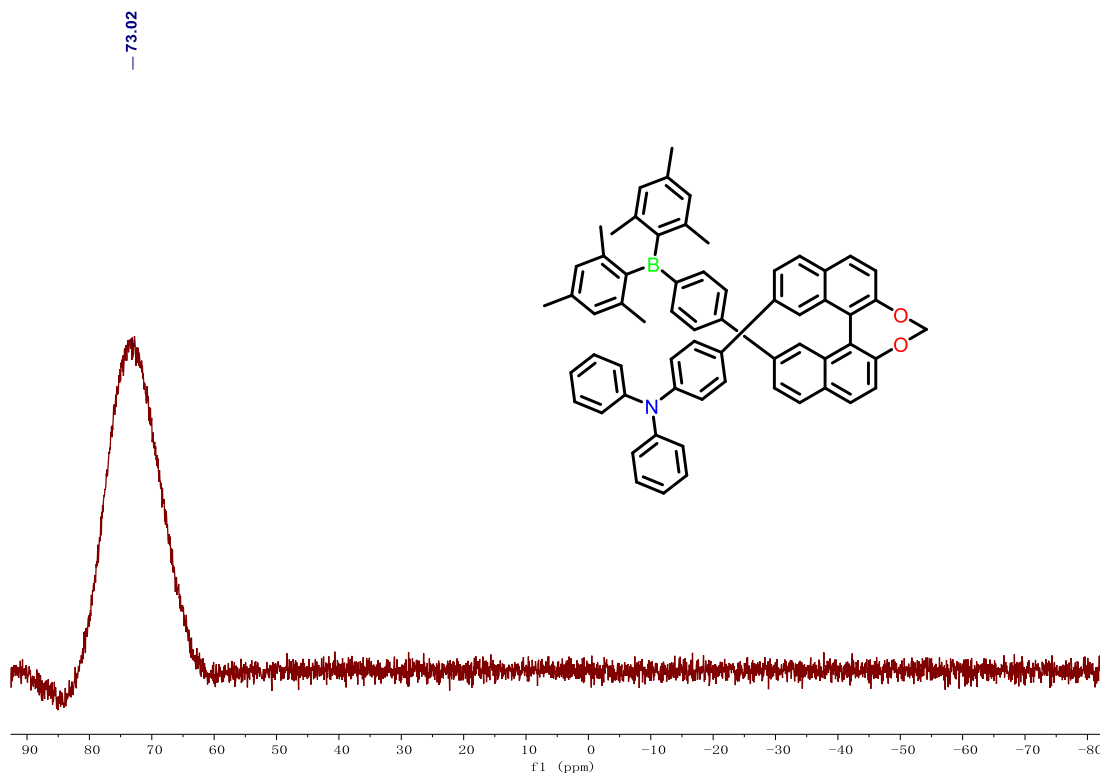

Figure S23. <sup>11</sup>B NMR (225 MHz, CDCl<sub>3</sub>) spectrum of *m*-BTB.

## 4. PL Spectra and Transient PL Decay Curves

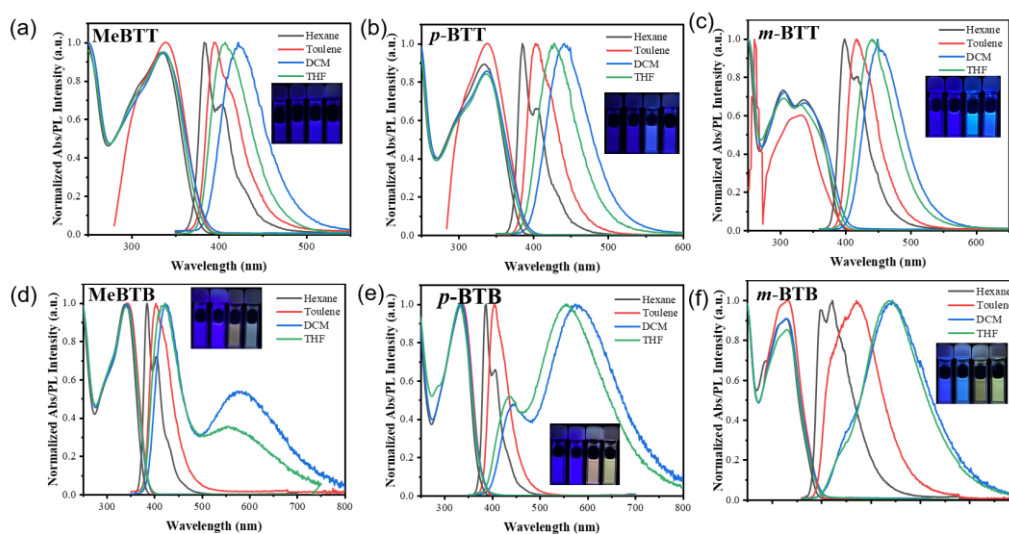

**Figure S24.** Absorption and emission spectra of (a) **MeBTT**, (b) **MeBTB**, (c) ***p*-BTT**, (d) ***p*-BTB**, (e) ***m*-BTT** and (f) ***m*-BTB** in solvents ( $c = 1.0 \times 10^{-5}$  M) of different polarities under  $N_2$  at 298 K. Inset: photographs showing the emission colors of **MeBTT**, **MeBTB**, ***p*-BTT**, ***p*-BTB**, ***m*-BTT** and ***m*-BTB** in solutions ( $c = 0.01$  mM) under 365 nm UV irradiation.

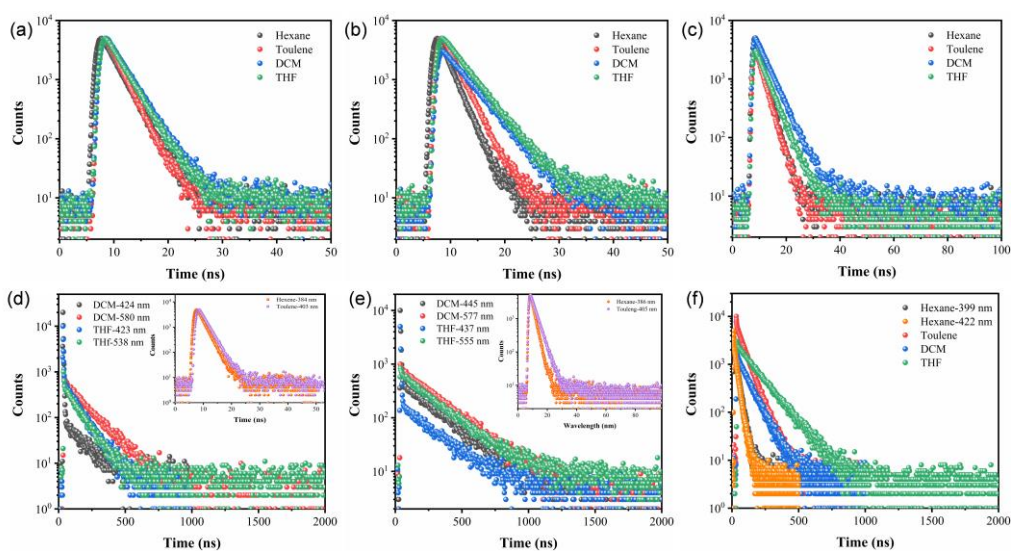

**Figure S25.** PL decay curves of (a) **MeBTT**, (b) **MeBTB**, (c) ***p*-BTT**, (d) ***p*-BTB**, (e) ***m*-BTT** and (f) ***m*-BTB** in solvents ( $c = 1.0 \times 10^{-5}$  M) of different polarities under  $N_2$  at 298 K.

**Table S1.** Absorption and emission properties of **MeBTT** in solvents ( $c = 1.0 \times 10^{-5}$  M) of different polarities under  $N_2$  at 298 K.

|       | Solvent | $\lambda_{abs}$ (nm) | $\lambda_{em}$ (nm) | $\Phi_{PL}$ (%) | $\tau$ (ns) |               | Rel % | $\chi^2$ |
|-------|---------|----------------------|---------------------|-----------------|-------------|---------------|-------|----------|
|       |         |                      |                     |                 | $\tau_1$    | $\tau_{ave.}$ |       |          |
| MeBTT | Hexane  | 335                  | 384                 | 60.5            | 2.57        | 2.57          | 100   | 1.293    |
|       | Toulene | 339                  | 395                 | 77.2            | 2.30        | 2.30          | 100   | 1.263    |
|       | DCM     | 335                  | 422                 | 81.4            | 2.98        | 2.98          | 100   | 1.188    |
|       | THF     | 336                  | 408                 | 85.5            | 2.84        | 2.84          | 100   | 1.251    |

**Table S2.** Absorption and emission properties of **MeBTB** in solvents ( $c = 1.0 \times 10^{-5}$  M) of different polarities under  $N_2$  at 298 K.

|       | Solvent | $\lambda_{abs}$ (nm) | $\lambda_{em}$ (nm) | $\Phi_{PL}$ (%) | $\tau$ (ns) |          |               | Rel %  | $\chi^2$    |       |
|-------|---------|----------------------|---------------------|-----------------|-------------|----------|---------------|--------|-------------|-------|
|       |         |                      |                     |                 | $\tau_1$    | $\tau_2$ | $\tau_{ave.}$ |        |             |       |
| MeBTB | Hexane  | 341                  | 384                 | 61.3            | 2.02        |          | 2.02          | 100    | 1.228       |       |
|       | Toulene | 343                  | 403                 | 80.5            | 2.26        |          | 2.26          | 100    | 1.291       |       |
|       | DCM     | 342                  |                     | 424             | 8.6         | 2.96     | 133.3         | 22.08  | 85.33/14.67 | 1.243 |
|       |         |                      |                     | 580             |             | 6.61     | 136           | 133.53 | 1.91/98.09  | 1.132 |
|       | THF     | 341                  |                     | 423             | 10.8        | 2.79     | 94.71         | 66.33  | 30.87/69.13 | 1.127 |
|       |         |                      |                     | 553             |             | 3.72     | 95.83         | 92.13  | 4.01/95.99  | 1.172 |

**Table S3.** Absorption and emission properties of ***p*-BTT** in solvents ( $c = 1.0 \times 10^{-5}$  M) of different polarities under  $N_2$  at 298 K.

|               | Solvent | $\lambda_{abs}$ (nm) | $\lambda_{em}$ (nm) | $\Phi_{PL}$ (%) | $\tau$ (ns) |               | Rel % | $\chi^2$ |
|---------------|---------|----------------------|---------------------|-----------------|-------------|---------------|-------|----------|
|               |         |                      |                     |                 | $\tau_1$    | $\tau_{ave.}$ |       |          |
| <i>p</i> -BTT | Hexane  | 336                  | 386                 | 63.2            | 1.99        | 1.99          | 100   | 1.283    |
|               | Toulene | 338                  | 403                 | 82.6            | 2.33        | 2.33          | 100   | 1.233    |
|               | DCM     | 338                  | 441                 | 89.8            | 3.95        | 3.95          | 100   | 1.279    |
|               | THF     | 337                  | 430                 | 96.0            | 3.64        | 3.64          | 100   | 1.238    |

**Table S4.** Absorption and emission properties of ***p*-BTB** in solvents ( $c = 1.0 \times 10^{-5}$  M) of different polarities under  $N_2$  at 298 K.

| <i>p</i> -BTB | Solvent | $\lambda_{abs}$ (nm) | $\lambda_{em}$ (nm) | $\Phi_{PL}$ (%) | $\tau$ (ns) |          |               | Rel % | $\chi^2$ |
|---------------|---------|----------------------|---------------------|-----------------|-------------|----------|---------------|-------|----------|
|               |         |                      |                     |                 | $\tau_1$    | $\tau_2$ | $\tau_{ave.}$ |       |          |

|  |         |     |     |      |      |        |        |             |       |
|--|---------|-----|-----|------|------|--------|--------|-------------|-------|
|  | Hexane  | 335 | 386 | 63.0 | 2.1  |        | 2.1    | 100         | 1.192 |
|  | Toulene | 337 | 404 | 81.6 | 3.15 |        | 3.15   | 100         | 0.995 |
|  | DCM     | 332 | 445 | 15.1 | 4.17 | 221.50 | 158.65 | 28.92/71.08 | 1.123 |
|  |         |     | 577 |      | 3.26 | 223.90 | 223.02 | 0.40/99.60  | 1.100 |
|  | THF     | 332 | 437 | 15.5 | 3.92 | 219.30 | 148.6  | 32.83/67.17 | 1.107 |
|  |         |     | 555 |      | 9.76 | 222.30 | 219.11 | 1.50/98.50  | 1.046 |

**Table S5.** Absorption and emission properties of *m*-BTT in solvents ( $c = 1.0 \times 10^{-5}$  M) of different polarities under N<sub>2</sub> at 298 K.

| <i>m</i> -BTT | Solvent | $\lambda_{\text{abs}}$ (nm) | $\lambda_{\text{em}}$ (nm) | $\Phi_{\text{PL}}$ (%) | $\tau$ (ns) |                     | Rel % | $\chi^2$ |
|---------------|---------|-----------------------------|----------------------------|------------------------|-------------|---------------------|-------|----------|
|               |         |                             |                            |                        | $\tau_1$    | $\tau_{\text{ave}}$ |       |          |
|               | Hexane  | 337                         | 399                        | 69.6                   | 2.48        | 2.48                | 100   | 1.260    |
| Toulene       | 336     | 416                         | 88                         | 2.75                   | 2.75        | 100                 | 1.212 |          |
| DCM           | 336     | 453                         | 100                        | 4.27                   | 4.27        | 100                 | 1.232 |          |
| THF           | 332     | 441                         | 95.8                       | 3.88                   | 3.88        | 100                 | 1.254 |          |

**Table S6.** Absorption and emission properties of *m*-BTB in solvents ( $c = 1.0 \times 10^{-5}$  M) of different polarities under N<sub>2</sub> at 298 K.

| <i>m</i> -BTB |        | $\lambda_{\text{abs}}$ (nm) | $\lambda_{\text{em}}$ (nm) | $\Phi_{\text{PL}}$ (%) | $\tau$ (ns) |          |                     | Rel %      | $\chi^2$ |
|---------------|--------|-----------------------------|----------------------------|------------------------|-------------|----------|---------------------|------------|----------|
|               |        |                             |                            |                        | $\tau_1$    | $\tau_2$ | $\tau_{\text{ave}}$ |            |          |
|               | Hexane | 332                         | 399                        | 21.4                   | 1.69        | 22.24    | 21.29               | 4.61/95.39 | 1.252    |
| 10.32         |        |                             |                            |                        | 24.98       | 22.62    | 16.09/83.91         | 1.224      |          |
| Toulene       | 332    | 473                         | 18.7                       | 3.57                   | 57.56       | 56.15    | 2.62/97.38          | 1.283      |          |
| DCM           | 332    | 545                         | 6.1                        | 5.62                   | 76.01       | 74.46    | 2.20/97.80          | 1.039      |          |
| THF           | 332    | 538                         | 6.3                        | 124.8                  |             | 124.8    | 100                 | 1.235      |          |

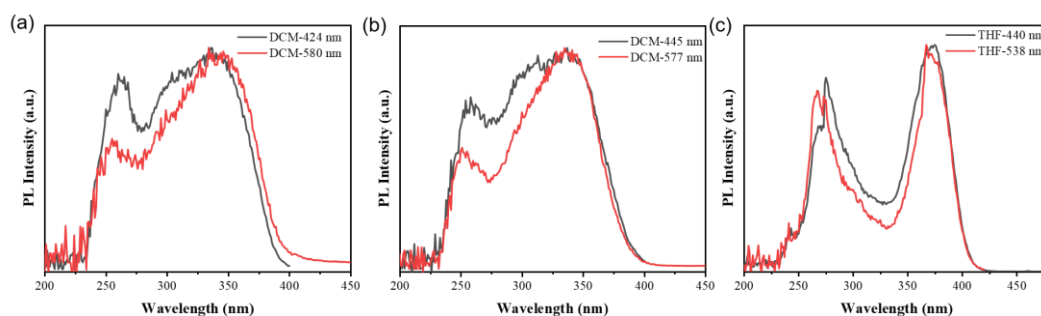

**Figure S26.** Excitation spectra of (a) MeBTB and (b) *p*-BTB and (c) *m*-BTB in CH<sub>2</sub>Cl<sub>2</sub> and THF ( $c = 1.0 \times 10^{-5}$  M) under N<sub>2</sub> at 298 K.

**Table S7.** Emission properties of MeBTT, MeBTB, *p*-BTT, *p*-BTB, *m*-BTT and *m*-BTB solid powder at 298 K.

|               | $\lambda_{em}$ [nm] in air | $\phi_{PL}$ (%) | $\tau$ [ns] |          |          |               | Rel %            | $\chi^2$ |
|---------------|----------------------------|-----------------|-------------|----------|----------|---------------|------------------|----------|
|               |                            |                 | $\tau_1$    | $\tau_2$ | $\tau_3$ | $\tau_{ave.}$ |                  |          |
| MeBTT         | 425                        | 21              | 0.92        | 1.82     |          | 1.41          | 46.60/53.40      | 1.290    |
| MeBTB         | 465                        | 23              | 35.68       | 119.3    |          | 93.77         | 30.52/69.48      | 1.109    |
| <i>p</i> -BTT | 420                        | 26              | 1.63        | 3.66     |          | 1.88          | 87.72/12.28      | 1.219    |
| <i>P</i> -BTB | 457                        | 28              | 35.77       | 108.9    |          | 81.46         | 37.52/62.48      | 1.215    |
| <i>m</i> -BTT | 433                        | 59              | 1.95        | 4.32     |          | 2.05          | 95.59/4.41       | 1.242    |
| <i>m</i> -BTB | 462                        | 30              | 7.88        | 48.41    | 111.2    | 69.44         | 6.74/55.43/37.84 | 1.288    |

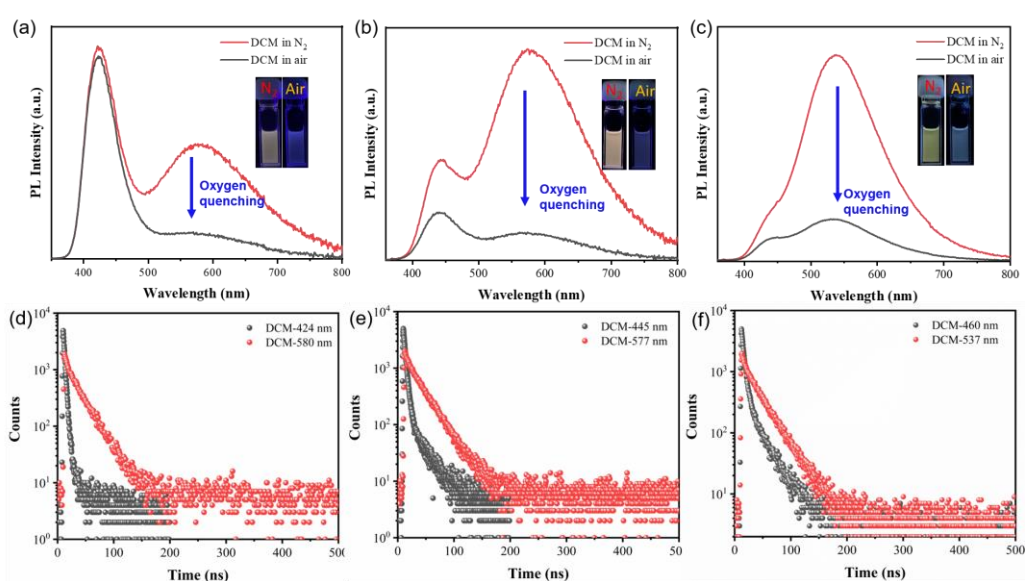

**Figure S27.** PL spectra and decay curves of (a) MeBTB, (b) *p*-BTB and (c) *m*-BTB in oxygen-free and air-saturated  $\text{CH}_2\text{Cl}_2$  ( $c = 1.0 \times 10^{-5}$  M) at 298 K and PL decay curves of (d) MeBTB, (e) *p*-BTB and (f) *m*-BTB in air-saturated  $\text{CH}_2\text{Cl}_2$  at 298 K.

**Table S8.** Emission properties of MeBTB, *p*-BTB and *m*-BTB in oxygen-free and air-saturated  $\text{CH}_2\text{Cl}_2$  ( $c = 1.0 \times 10^{-5}$  M) at 298 K

|               | Atmosphere   | $\lambda_{em}$ [nm] | $\phi_{PL}$ (%) | $\tau$ [ns] |          |               | Rel %       | $\chi^2$ |
|---------------|--------------|---------------------|-----------------|-------------|----------|---------------|-------------|----------|
|               |              |                     |                 | $\tau_1$    | $\tau_2$ | $\tau_{ave.}$ |             |          |
| MeBTB         | $\text{N}_2$ | 424                 | 8.6             | 2.96        | 133.3    | 22.08         | 85.33/14.67 | 1.243    |
|               |              | 580                 |                 | 6.61        | 136      | 133.53        | 1.91/98.09  | 1.132    |
|               | Air          | 423                 | 3.8             | 2.67        | 21.27    | 3.29          | 96.65/3.35  | 1.075    |
|               |              | 580                 |                 | 3.78        | 24.86    | 22.96         | 9.02/90.98  | 1.141    |
| <i>p</i> -BTB | $\text{N}_2$ | 445                 | 15.1            | 4.17        | 221.5    | 158.65        | 28.92/71.08 | 1.123    |

|                     |                |     |     |      |       |        |              |       |
|---------------------|----------------|-----|-----|------|-------|--------|--------------|-------|
|                     |                | 577 |     | 3.26 | 223.9 | 223.02 | 0.40/99.60   | 1.100 |
|                     | Air            | 445 | 3.1 | 3.55 | 26.03 | 7.73   | 81.39/ 18.61 | 1.225 |
|                     |                | 577 |     | 4.44 | 27.23 | 25.99  | 5.44/94.56   | 1.163 |
| <b><i>m</i>-BTB</b> | N <sub>2</sub> | 460 | 6.1 | 4.88 | 74.01 | 59.59  | 20.86/79.14  | 1.128 |
|                     |                | 545 |     | 5.62 | 76.01 | 74.46  | 2.20/97.80   | 1.039 |
|                     | Air            | 460 | 3   | 4.22 | 25.85 | 11.44  | 66.62/33.38  | 1.040 |
|                     |                | 537 |     | 4.96 | 28.85 | 26.93  | 8.02/91.98   | 1.146 |

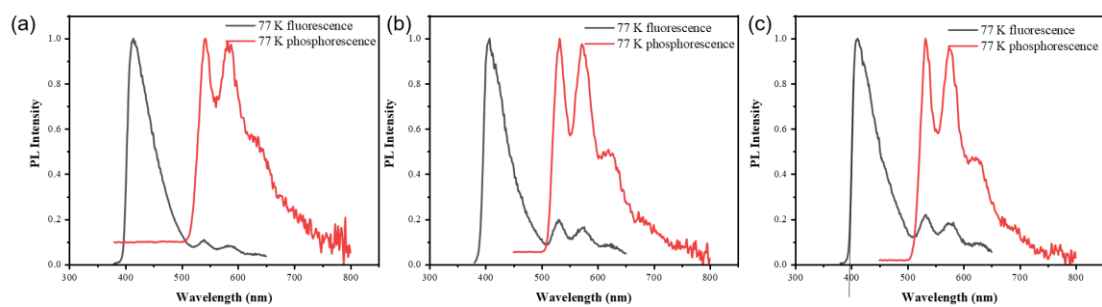

**Figure S28.** Fluorescence and phosphorescence spectra of **MeBTB**, ***p*-BTB** and ***m*-BTB** in MTHF at 77 K.



## 5. Chiral HPLC Trace Analysis

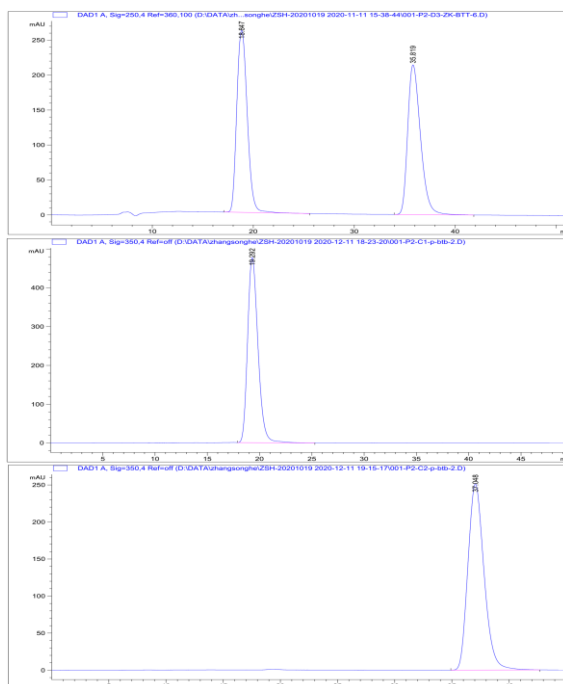

**Figure S29.** HPLC chromatogram used for chiral resolution of enantiomers of *p*-BTT by a preparative HPLC equipped with a Daicel Chiralpak IF column with *n*-hexane/isopropanol = 95:5, flow = 3.0 mL/min.

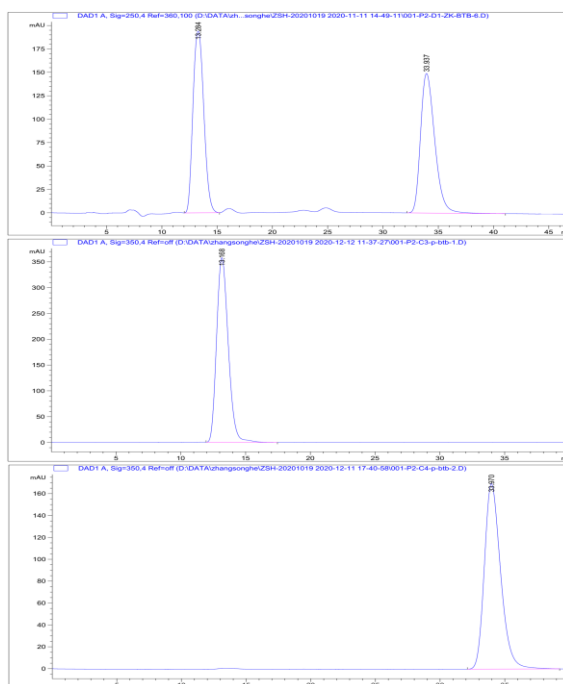

**Figure S30.** HPLC chromatogram used for chiral resolution of enantiomers of *p*-BTB by a preparative HPLC equipped with a Daicel Chiralpak IF column with *n*-hexane/isopropanol = 95:5, flow = 3.0 mL/min.

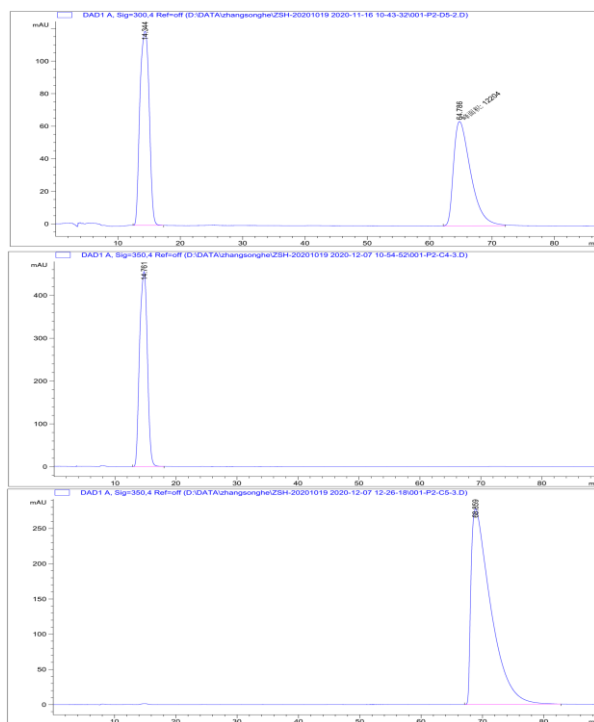

**Figure S31.** HPLC chromatogram used for chiral resolution of enantiomers of *m*-BTT by a preparative HPLC equipped with a Daicel Chiralpak IB column with *n*-hexane/isopropanol = 90:10, flow = 3.0 mL/min.

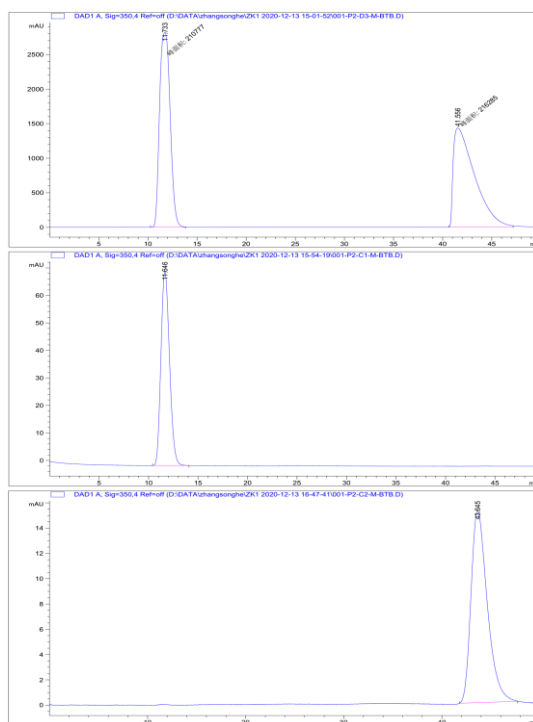

**Figure S32.** HPLC chromatogram used for chiral resolution of enantiomers of *m*-BTB by a preparative HPLC equipped with a Daicel Chiralpak IB column with *n*-hexane/isopropanol = 90:10, flow = 3.0 mL/min.

**Table S9.** Summary of the HPLC analysis of *p*-**BTT**, *p*-**BTB**, *m*-**BTT** and *m*-**BTB**.

|                                    | Fraction                            | Retention Time / min | Area / % | Enantiomeric excess (ee) | $[\alpha] / ^\circ$<br>T =25 °C<br>$\lambda = 589 \text{ nm}$ |
|------------------------------------|-------------------------------------|----------------------|----------|--------------------------|---------------------------------------------------------------|
| <i>rac</i> - <b>p</b> - <b>BTT</b> | Peak1                               | 18.8                 | 49.94    | -                        | -                                                             |
|                                    | Peak2                               | 35.8                 | 50.06    | -                        | -                                                             |
| enantiopure <b>p</b> - <b>BTT</b>  | ( <i>S</i> )- <b>p</b> - <b>BTT</b> | 19.3                 | 100      | > 99%                    | +563                                                          |
|                                    | ( <i>R</i> )- <b>p</b> - <b>BTT</b> | 37.0                 | 100      | > 99%                    | -616                                                          |
| <i>rac</i> - <b>p</b> - <b>BTB</b> | Peak1                               | 13.3                 | 49.83    | -                        | -                                                             |
|                                    | Peak2                               | 33.9                 | 50.17    | -                        | -                                                             |
| enantiopure <b>p</b> - <b>BTB</b>  | ( <i>S</i> )- <b>p</b> - <b>BTB</b> | 13.2                 | 100      | > 99%                    | +488                                                          |
|                                    | ( <i>R</i> )- <b>p</b> - <b>BTB</b> | 34.0                 | 100      | > 99%                    | -521                                                          |
| <i>rac</i> - <b>m</b> - <b>BTT</b> | Peak1                               | 14.3                 | 50.3     | -                        | -                                                             |
|                                    | Peak2                               | 64.8                 | 49.7     | -                        | -                                                             |
| enantiopure <b>m</b> - <b>BTT</b>  | ( <i>R</i> )- <b>m</b> - <b>BTT</b> | 14.8                 | 100      | > 99%                    | -1262                                                         |
|                                    | ( <i>S</i> )- <b>m</b> - <b>BTT</b> | 68.9                 | 100      | > 99%                    | +1044                                                         |
| <i>rac</i> - <b>m</b> - <b>BTB</b> | Peak1                               | 11.7                 | 49.36    | -                        | -                                                             |
|                                    | Peak2                               | 41.6                 | 50.64    | -                        | -                                                             |
| enantiopure <b>m</b> - <b>BTB</b>  | ( <i>R</i> )- <b>m</b> - <b>BTB</b> | 11.6                 | 100      | > 99%                    | -1174                                                         |
|                                    | ( <i>S</i> )- <b>m</b> - <b>BTB</b> | 43.6                 | 100      | > 99%                    | +1084                                                         |

## 6. CPL Spectra in Different Solutions

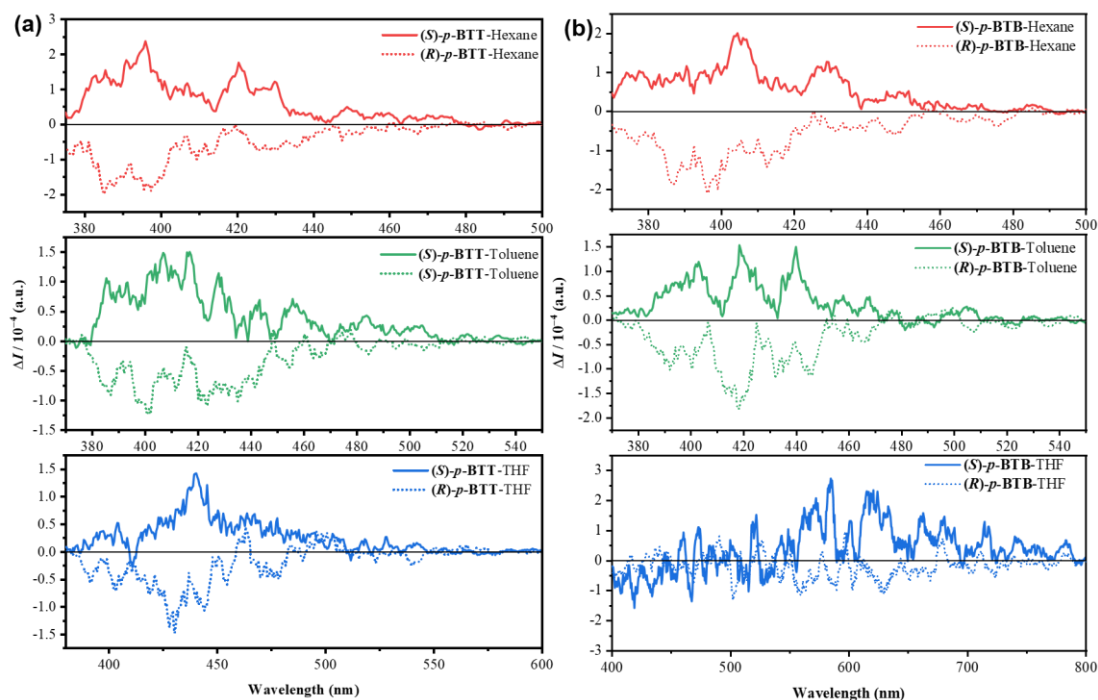

**Figure S33.** CPL spectra of enantiomers for (a) *p*-BTT, (b) *p*-BTB, after optical resolution in solvents ( $c = 0.01$  mM) with different polarities under  $N_2$  at 298 K.

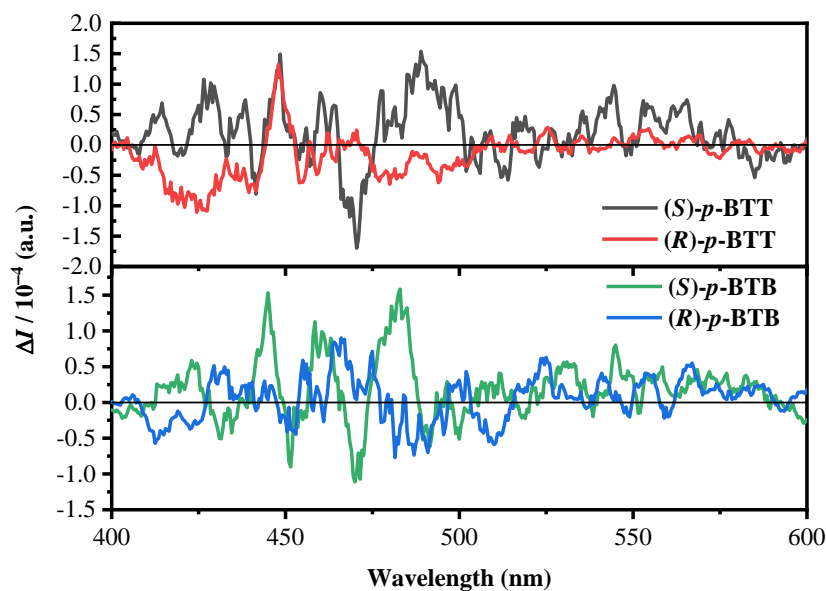

**Figure 34.** CPL spectra of enantiomers for *p*-BTT and *p*-BTB neat films after optical resolution at 298 K.

**Table S10.** Summary of the photophysical and chiroptical data of **BNPh<sub>2</sub>-BNaph** in various solvents reported by Zhao and Peng (see *ACIE*, 2019, 58, 4840–4846).

| Compound                                                                                                           | Solvents    | $\lambda_{\text{abs}}$ | $\lambda_{\text{em}}$ | $\Phi_{\text{PL}}$ | $g_{\text{lum}} 10^{-3} (\lambda_{\text{em}}/\text{nm})$ |                              |
|--------------------------------------------------------------------------------------------------------------------|-------------|------------------------|-----------------------|--------------------|----------------------------------------------------------|------------------------------|
|                                                                                                                    |             |                        |                       |                    | (+)-BNPh <sub>2</sub> -BNaph                             | (-)-BNPh <sub>2</sub> -BNaph |
| 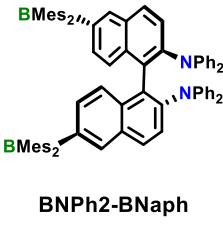<br><b>BNPh<sub>2</sub>-BNaph</b> | cyclohexane | 398                    | 440                   | 0.75               | -1.17 (455)                                              | +1.53 (453)                  |
|                                                                                                                    | benzene     | 398                    | 456                   | 0.68               | -0.25(450)<br>+0.42(519)                                 | +0.53 (463)<br>-0.33 (521)   |
|                                                                                                                    | chloroform  | 296                    | 472                   | 0.58               | --                                                       | --                           |
|                                                                                                                    | THF         | 396                    | 482                   | 0.51               | -0.46 (446)<br>+0.74(510)                                | +0.29 (463)<br>-0.46 (528)   |
|                                                                                                                    | MOE         | 396                    | 487                   | 0.52               | --                                                       | --                           |
|                                                                                                                    | MeCN        | 390                    | 512                   | 0.26               | +1.19 (524)                                              | -0.52 (521)                  |

## 7. Thermochromic Emissions and Aggregation-induced Emission Properties

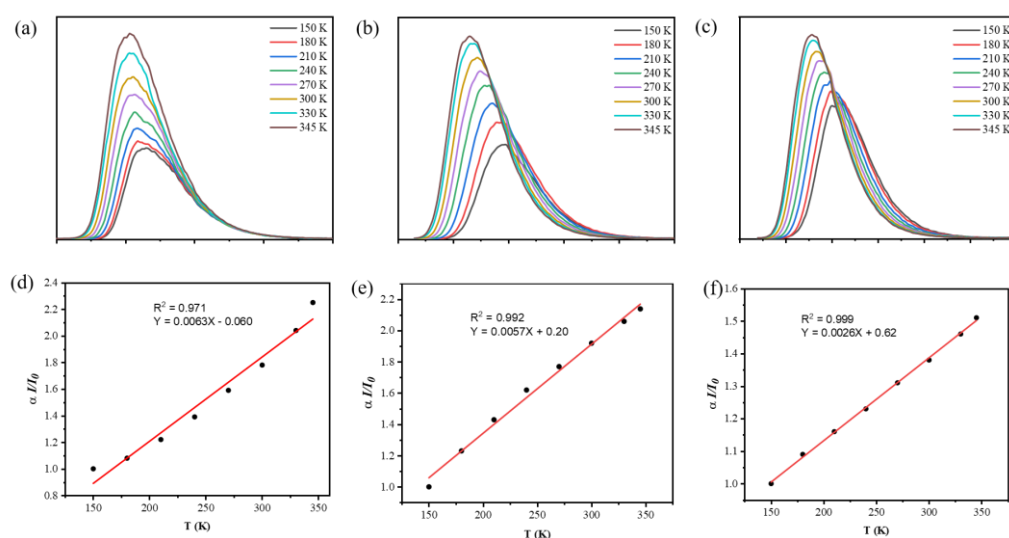

**Figure S35.** Temperature-dependent spectra and plot of relative PL intensity ( $\alpha I/I_0$ ) at  $\lambda_{\text{max}}$  versus T of (a, d) **MeBTT**, (b, e) **p-BTT** and (c, f) **m-BTT** in 2-MeTHF ( $c = 0.03$  mM) recorded between 150 and 345 K under N<sub>2</sub> atmosphere, where  $I_0$  = emission intensity at 150 K,  $I$  = emission intensity at different temperature.

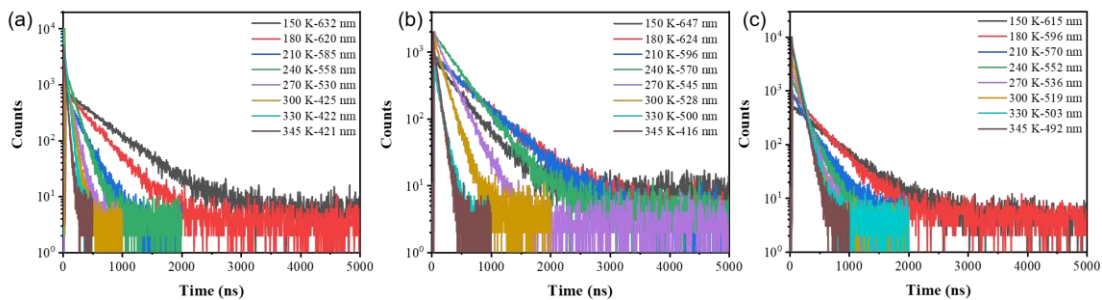

**Figure S36.** Temperature-dependent transient decay spectra of (a) **MeBTB**, (b) **p-BTB** and (c) **m-BTB** in MTHF ( $c = 0.03$  mM) recorded between 150 and 345 K under  $N_2$ .

**Table S11.** Temperature-dependent photophysical properties and fitting results of temperature-dependent transient decay spectra of **MeBTB** in MTHF ( $c = 0.03$  mM) under  $N_2$ .

| T [K] | $\lambda_{\max}$ [nm] | $\tau$ [ns] |          |                      | Rel %       | $\chi^2$ | CIE [x,y]    |
|-------|-----------------------|-------------|----------|----------------------|-------------|----------|--------------|
|       |                       | $\tau_1$    | $\tau_2$ | $\tau_{\text{ave.}}$ |             |          |              |
| 150   | 632                   | 523.10      |          | 523.10               | 100         | 1.217    | [0.34, 0.22] |
| 180   | 620                   | 356.70      |          | 356.70               | 100         | 1.166    | [0.35, 0.25] |
| 210   | 585                   | 196.60      |          | 196.60               | 100         | 1.064    | [0.32, 0.28] |
| 240   | 558                   | 5.91        | 125.00   | 122.22               | 2.33/97.67  | 1.136    | [0.29, 0.29] |
| 270   | 530                   | 3.86        | 85.61    | 82.50                | 3.81/96.19  | 1.058    | [0.23, 0.23] |
| 300   | 425                   | 2.77        | 60.78    | 54.81                | 10.30/89.70 | 1.075    | [0.19, 0.14] |
| 330   | 422                   | 2.73        | 42.45    | 40.85                | 4.03/95.97  | 1.078    | [0.17, 0.08] |
| 345   | 421                   | 3.07        | 32.55    | 31.69                | 2.93/97.07  | 1.206    | [0.16, 0.06] |

**Table S12.** Temperature-dependent photophysical properties and fitting results of temperature-dependent transient decay spectra of **p-BTB** in MTHF ( $c = 0.03$  mM) under  $N_2$ .

| T [K] | $\lambda_{\max}$ [nm] | $\tau$ [ns] |          |                      | Rel %      | $\chi^2$ | CIE [x,y]    |
|-------|-----------------------|-------------|----------|----------------------|------------|----------|--------------|
|       |                       | $\tau_1$    | $\tau_2$ | $\tau_{\text{ave.}}$ |            |          |              |
| 150   | 647                   | 368.80      |          | 368.80               | 100        | 1.121    | [0.46, 0.31] |
| 180   | 624                   | 537.90      |          | 537.90               | 100        | 1.088    | [0.50, 0.39] |
| 210   | 596                   | 521.00      |          | 521.00               | 100        | 1.214    | [0.47, 0.45] |
| 240   | 570                   | 345.90      |          | 345.90               | 100        | 1.217    | [0.41, 0.47] |
| 270   | 545                   | 216.70      |          | 216.70               | 100        | 1.017    | [0.34, 0.45] |
| 300   | 528                   | 141.90      |          | 141.90               | 100        | 1.289    | [0.26, 0.32] |
| 330   | 500                   | 87.27       |          | 87.27                | 100        | 1.104    | [0.19, 0.15] |
| 345   | 416                   | 3.87        | 68.26    | 66.12                | 3.32/96.68 | 1.035    | [0.18, 0.10] |

**Table S13.** Temperature-dependent photophysical properties and fitting results of temperature-dependent transient decay spectra of *m*-BTB in MTHF ( $c = 0.03$  mM) under  $N_2$ .

| T [K] | $\lambda_{\max}$ [nm] | $\tau$ [ns] |          |                      | Rel %      | $\chi^2$ | CIE [x,y]    |
|-------|-----------------------|-------------|----------|----------------------|------------|----------|--------------|
|       |                       | $\tau_1$    | $\tau_2$ | $\tau_{\text{ave.}}$ |            |          |              |
| 150   | 615                   | 468.00      |          | 468.00               | 100        | 1.170    | [0.50, 0.42] |
| 180   | 596                   | 345.70      |          | 345.70               | 100        | 1.194    | [0.47, 0.45] |
| 210   | 570                   | 226.10      |          | 226.10               | 100        | 1.061    | [0.42, 0.47] |
| 240   | 552                   | 161.90      |          | 161.90               | 100        | 1.113    | [0.37, 0.49] |
| 270   | 536                   | 123.20      |          | 123.20               | 100        | 1.123    | [0.32, 0.48] |
| 300   | 519                   | 99.38       |          | 99.38                | 100        | 1.173    | [0.27, 0.42] |
| 330   | 503                   | 6.91        | 85.93    | 84.46                | 1.86/98.14 | 1.185    | [0.22, 0.33] |
| 345   | 492                   | 4.31        | 78.58    | 73.91                | 2.25/97.75 | 1.172    | [0.20, 0.28] |

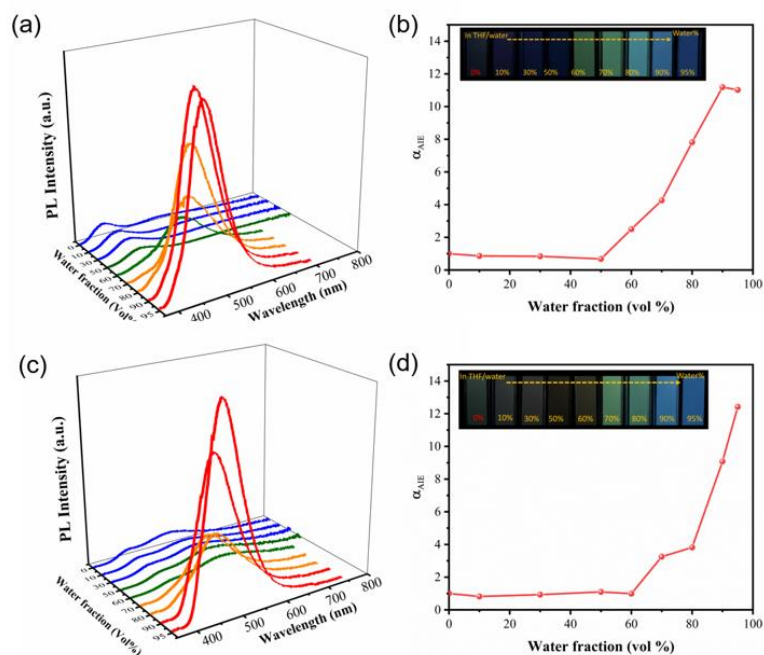

**Figure 37.** (a, c) Emission spectra of *p*-BTB and *m*-BTB ( $c = 1.0 \times 10^{-5}$  M) in THF/water mixtures with different water content. (b, d) Plot of relative PL intensity ( $\alpha_{\text{AIE}}$ ) at  $\lambda_{\max}$  versus  $f_w$  of the THF/water mixtures of *p*-BTB and *m*-BTB, where  $\alpha_{\text{AIE}} = I/I_0$  and  $I_0$  = emission intensity in pure THF solution. Inset: photographs of *p*-BTB and *m*-BTB in THF and THF/water mixtures with different water content taken under 365 nm UV light.

## 8. DFT and TD-DFT Computations and Electrochemical Measurements

DFT and TD-DFT calculations were performed using the Gaussian 09 suite of programs.<sup>[6]</sup> Geometry optimizations and vertical excitations of all compounds were obtained at the CAM-B3LYP/6-31G\* and (TD) CAM-B3LYP/6-31G\* level of theory,<sup>[7, 8]</sup> and the resulting structures were confirmed to be stationary points through vibrational frequency analysis.

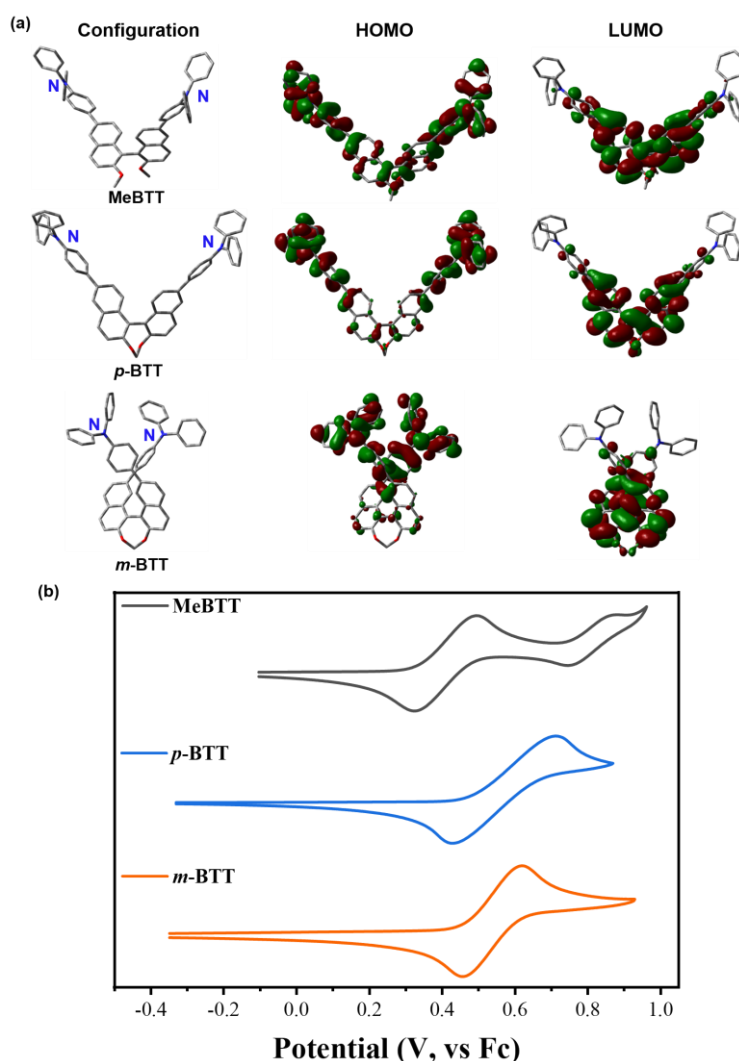

**Figure S38.** The DFT optimized structures and frontier molecular orbital plots of **MeBTT**, **p-BTT** and **m-BTT** (iso = 0.02, CAM-B3LYP/6-31G\*) in the ground state. Hydrogen atoms are omitted. (b) Cyclic voltammetry of **MeBTT**, **p-BTT** and **m-BTT** showing the oxidation waves in CH<sub>2</sub>Cl<sub>2</sub> (vs Fc<sup>+</sup>/Fc) with *n*-Bu<sub>4</sub>NPF<sub>6</sub> (*c* = 0.1 M) as the electrolyte, *v* = 100 mV/s.



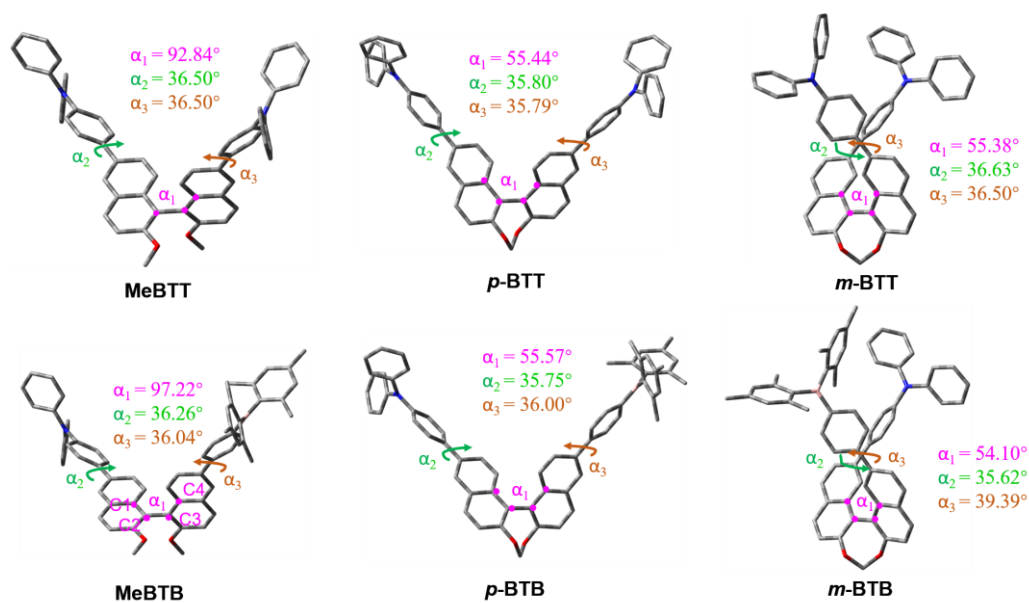

**Figure S39.** The optimized structures (CAM-B3LYP/6-31G\*) in the ground state. Hydrogen atoms are omitted. The angles between the adjacent aryl rings are shown for comparison.

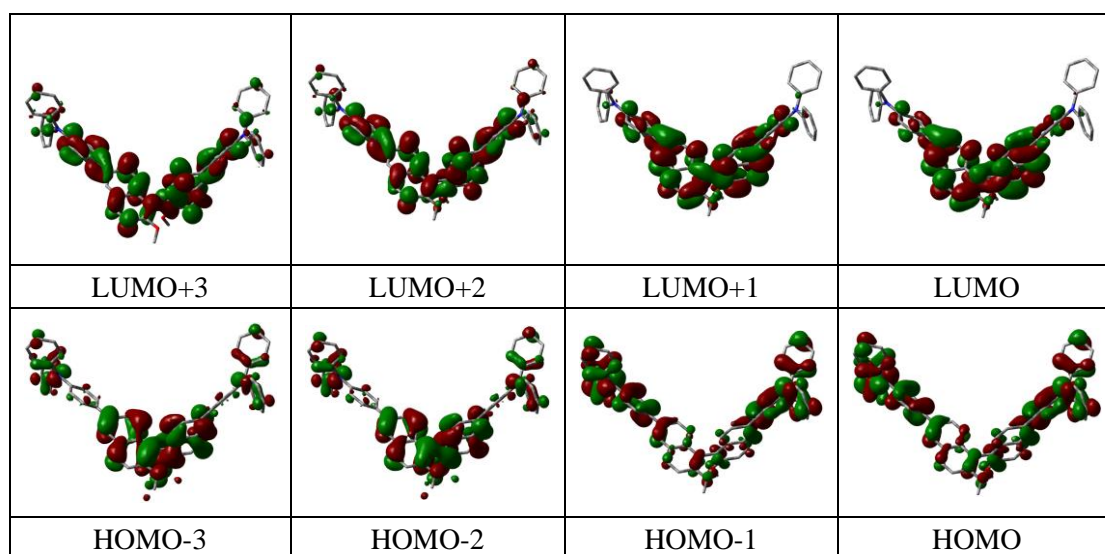

**Figure S40.** Molecular orbitals contributing to the DFT calculated transitions of MeBTT (iso = 0.02, CAM-B3LYP/6-31G\*) in the ground state.

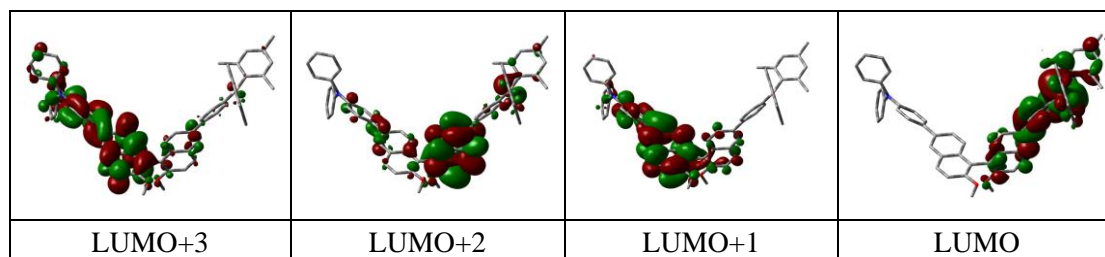

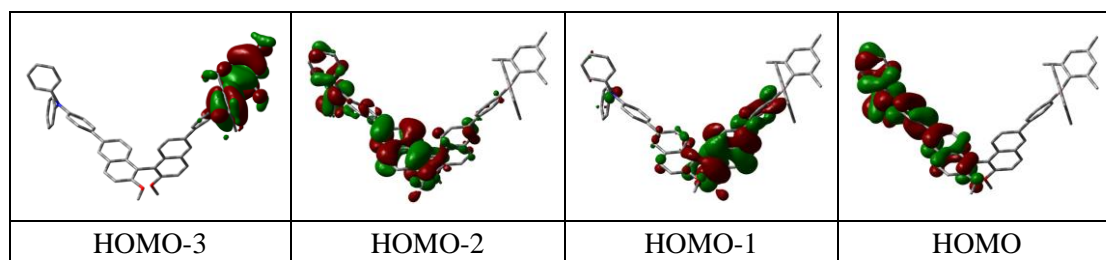

**Figure S41.** Molecular orbitals contributing to the DFT calculated transitions of **MeBTB** (iso = 0.02, CAM-B3LYP/6-31G\*) in the ground state.

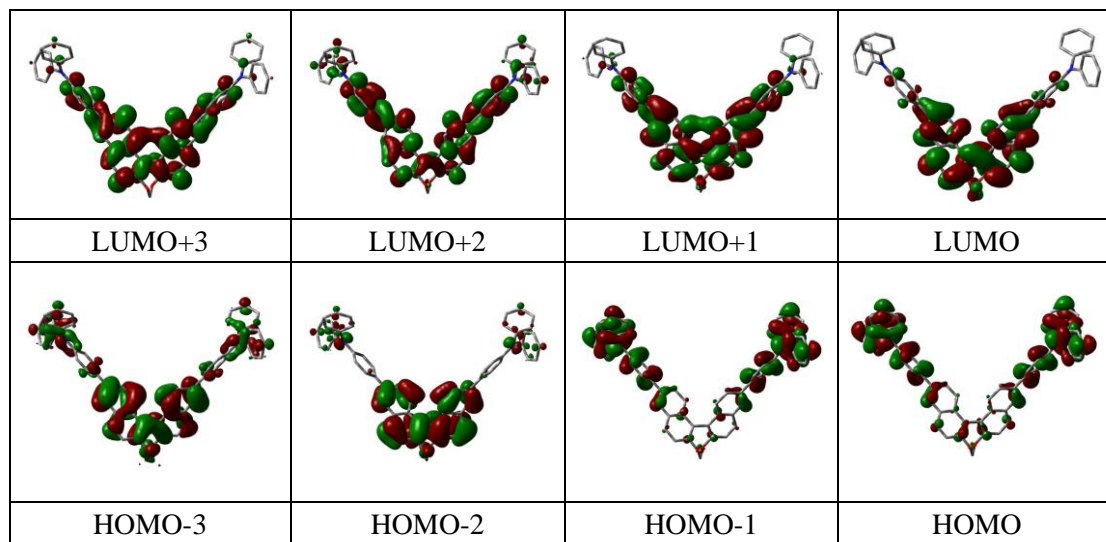

**Figure S42.** Molecular orbitals contributing to the DFT calculated transitions of **p-BTT** (iso = 0.02, CAM-B3LYP/6-31G\*) in the ground state.

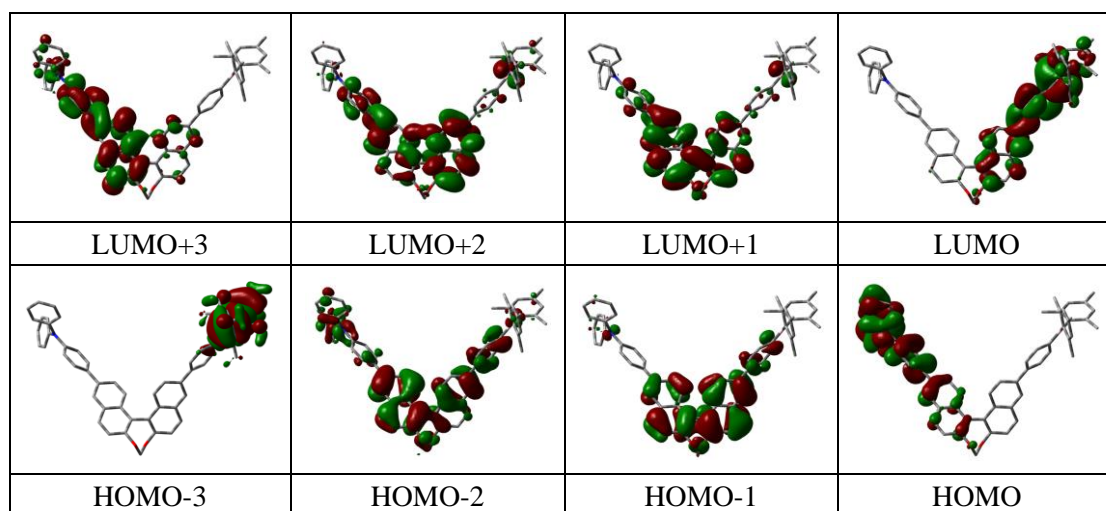

**Figure S43.** Molecular orbitals contributing to the DFT calculated transitions of **p-BTB** (iso = 0.02, CAM-B3LYP/6-31G\*) in the ground state.

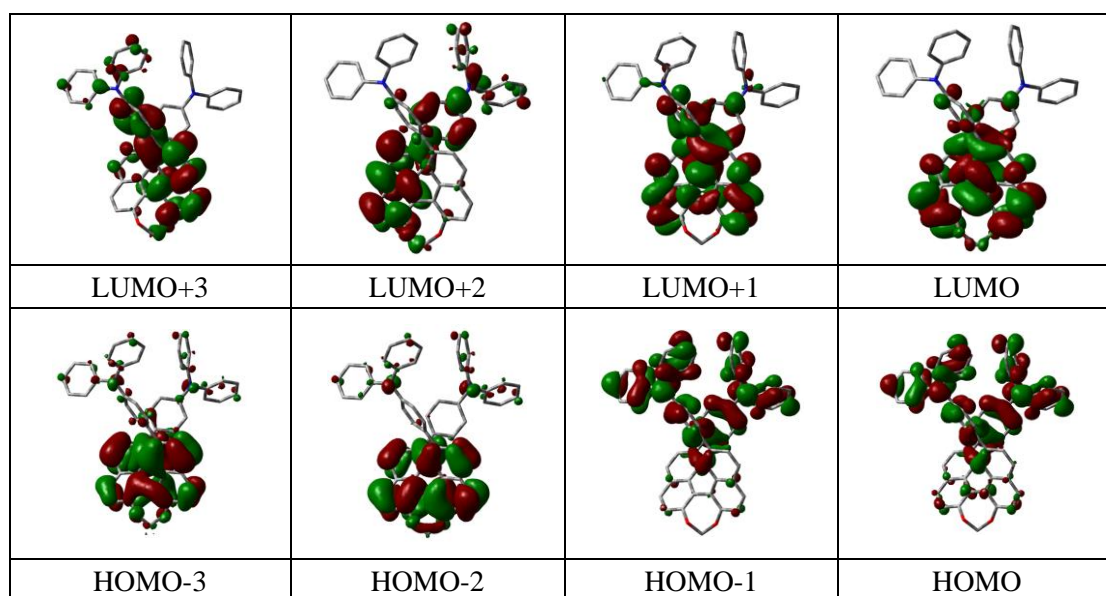

**Figure S44.** Molecular orbitals contributing to the DFT calculated transitions of *m*-BTT (iso = 0.02, CAM-B3LYP/6-31G\*) in the ground state.

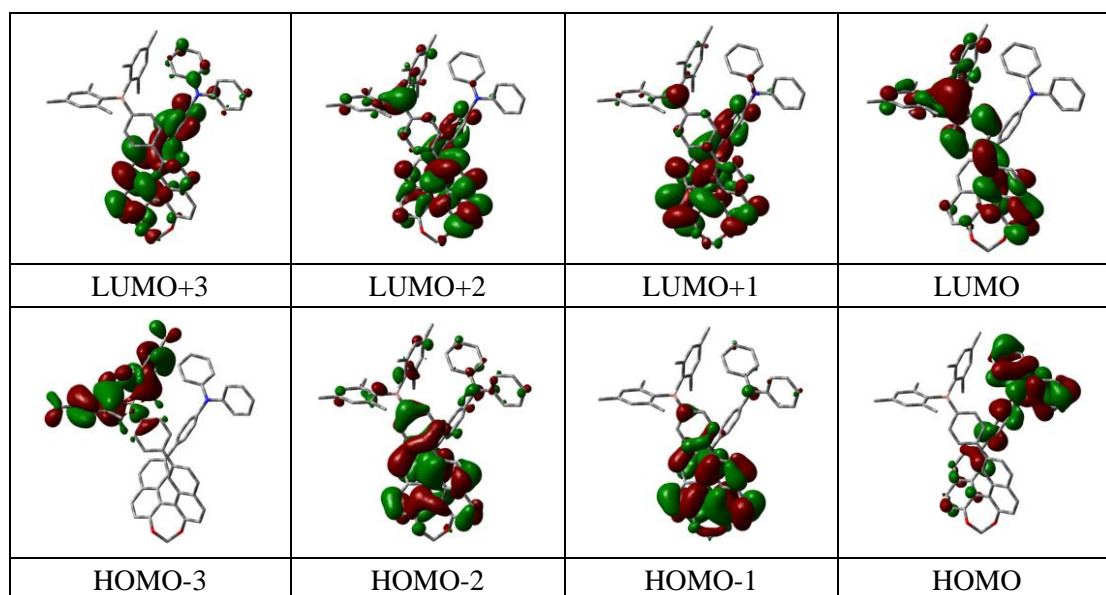

**Figure S45.** Molecular orbitals contributing to the DFT calculated transitions of *m*-BTB (iso = 0.02, CAM-B3LYP/6-31G\*) in the ground state.

**Table S14.** Summary of the TD-DFT calculations about selected transitions and oscillator strengths in CH<sub>2</sub>Cl<sub>2</sub> (CAM-B3LYP/6-31G\*) in the ground state.

| Compound | Transition                     | $\lambda$ , nm (eV) | Oscillator Strength, $f$ | Orbital Contributions                  |
|----------|--------------------------------|---------------------|--------------------------|----------------------------------------|
| MeBTT    | S <sub>0</sub> →S <sub>1</sub> | 4.0247<br>(308.06)  | 0.7263                   | HOMO→LUMO+1 (34%)<br>HOMO-1→LUMO (27%) |
|          | S <sub>0</sub> →S <sub>2</sub> | 4.0248<br>(308.05)  | 0.9033                   | HOMO→LUMO (31%)<br>HOMO-1→LUMO+1 (30%) |

|               |                       |            |        |                                                                                                                                              |
|---------------|-----------------------|------------|--------|----------------------------------------------------------------------------------------------------------------------------------------------|
|               | $S_0 \rightarrow S_3$ | 4.21 (295) | 0.8960 | HOMO $\rightarrow$ LUMO+2 (31%)<br>HOMO-1 $\rightarrow$ LUMO+3 (20%)<br>HOMO-2 $\rightarrow$ LUMO (15%)                                      |
|               | $S_0 \rightarrow S_4$ | 4.31 (287) | 0.1671 | HOMO-1 $\rightarrow$ LUMO+2 (28%)<br>HOMO $\rightarrow$ LUMO+3 (24%)                                                                         |
|               | $S_0 \rightarrow S_5$ | 4.45 (279) | 0.0446 | HOMO $\rightarrow$ LUMO+2 (55%)                                                                                                              |
| <b>MeBTB</b>  | $S_0 \rightarrow S_1$ | 3.98 (312) | 1.0146 | HOMO-1 $\rightarrow$ LUMO (58%)                                                                                                              |
|               | $S_0 \rightarrow S_2$ | 4.02 (308) | 0.7979 | HOMO $\rightarrow$ LUMO+1 (62%)                                                                                                              |
|               | $S_0 \rightarrow S_3$ | 4.10 (303) | 0.1431 | HOMO-3 $\rightarrow$ LUMO (85%)                                                                                                              |
|               | $S_0 \rightarrow S_4$ | 4.20 (295) | 0.6392 | HOMO-1 $\rightarrow$ LUMO+2 (30%)<br>HOMO $\rightarrow$ LUMO+3 (21%)<br>HOMO-1 $\rightarrow$ LUMO+1 (12%)                                    |
|               | $S_0 \rightarrow S_5$ | 4.30 (288) | 0.1080 | HOMO-3 $\rightarrow$ LUMO (96%)                                                                                                              |
|               | $S_0 \rightarrow S_6$ | 4.41(281)  | 0.0125 | HOMO-4 $\rightarrow$ LUMO (54%)<br>HOMO-1 $\rightarrow$ LUMO (12%)                                                                           |
| <i>p</i> -BTT | $S_0 \rightarrow S_1$ | 4.02 (309) | 0.7008 | HOMO-1 $\rightarrow$ LUMO+1 (33%)<br>HOMO $\rightarrow$ LUMO (28%)<br>HOMO $\rightarrow$ LUMO+2 (15%)                                        |
|               | $S_0 \rightarrow S_2$ | 4.04(307)  | 1.0888 | HOMO $\rightarrow$ LUMO+1 (32%)<br>HOMO-1 $\rightarrow$ LUMO (30%)<br>HOMO-1 $\rightarrow$ LUMO+2 (13%)                                      |
|               | $S_0 \rightarrow S_3$ | 4.20(295)  | 0.8254 | HOMO-2 $\rightarrow$ LUMO+1 (53%)<br>HOMO $\rightarrow$ LUMO+2 (13%)                                                                         |
|               | $S_0 \rightarrow S_4$ | 4.33(286)  | 0.1377 | HOMO-1 $\rightarrow$ LUMO+2 (17%)<br>HOMO $\rightarrow$ LUMO+3 (17%)<br>HOMO-3 $\rightarrow$ LUMO (10%)<br>HOMO-2 $\rightarrow$ LUMO+3 (10%) |
|               | $S_0 \rightarrow S_5$ | 4.43(280)  | 0.0404 | HOMO-2 $\rightarrow$ LUMO (17%)<br>HOMO-4 $\rightarrow$ LUMO (15%)<br>HOMO-1 $\rightarrow$ LUMO (10%)                                        |
|               | $S_0 \rightarrow S_6$ | 4.46(278)  | 0.0302 | HOMO $\rightarrow$ LUMO (41%)                                                                                                                |
| <i>p</i> -BTB | $S_0 \rightarrow S_1$ | 4.02(308)  | 0.8039 | HOMO $\rightarrow$ LUMO+1 (38%)<br>HOMO $\rightarrow$ LUMO+2 (24%)<br>HOMO $\rightarrow$ LUMO+3 (14%)                                        |
|               | $S_0 \rightarrow S_2$ | 4.077(304) | 0.5850 | HOMO-3 $\rightarrow$ LUMO (33%)<br>HOMO-1 $\rightarrow$ LUMO (19%)<br>HOMO-2 $\rightarrow$ LUMO (12%)<br>HOMO-4 $\rightarrow$ LUMO (11%)     |
|               | $S_0 \rightarrow S_3$ | 4.083(304) | 0.5000 | HOMO-3 $\rightarrow$ LUMO (47%)<br>HOMO-1 $\rightarrow$ LUMO (12%)<br>HOMO-2 $\rightarrow$ LUMO (12%)                                        |
|               | $S_0 \rightarrow S_4$ | 4.21(294)  | 0.7265 | HOMO-1 $\rightarrow$ LUMO+1 (47%)                                                                                                            |

|                     |                                |             |        |                                                                                  |
|---------------------|--------------------------------|-------------|--------|----------------------------------------------------------------------------------|
|                     |                                |             |        | HOMO→LUMO+3 (11%)                                                                |
|                     | S <sub>0</sub> →S <sub>5</sub> | 4.35(285)   | 0.0210 | HOMO-1→LUMO+1 (15%)<br>HOMO→LUMO+3 (14%)                                         |
|                     | S <sub>0</sub> →S <sub>6</sub> | 4.41(281)   | 0.0029 | HOMO-4→LUMO (22%)<br>HOMO-1→LUMO (14%)                                           |
| <b><i>m</i>-BTT</b> | S <sub>0</sub> →S <sub>1</sub> | 3.78(328)   | 0.3943 | HOMO→LUMO (42%)<br>HOMO-1→LUMO+1 (20%)<br>HOMO-2→LUMO (20%)                      |
|                     | S <sub>0</sub> →S <sub>2</sub> | 3.97(312)   | 1.2197 | HOMO-1→LUMO (36%)<br>HOMO→LUMO+1 (34%)                                           |
|                     | S <sub>0</sub> →S <sub>3</sub> | 4.21(295)   | 0.5307 | HOMO-2→LUMO (54%)<br>HOMO-1→LUMO+1 (18%)                                         |
|                     | S <sub>0</sub> →S <sub>4</sub> | 4.30(288)   | 0.0240 | HOMO→LUMO+3 (12%)<br>HOMO-2→LUMO+1 (10%)                                         |
|                     | S <sub>0</sub> →S <sub>5</sub> | 4.35(285)   | 0.1006 | HOMO-2→LUMO+2 (17%)<br>HOMO-5→LUMO (14%)<br>HOMO-1→LUMO+3 (11%)                  |
|                     | S <sub>0</sub> →S <sub>6</sub> | 4.43(279.4) | 0.0133 | HOMO-1→LUMO (40%)                                                                |
| <b><i>m</i>-BTB</b> | S <sub>0</sub> →S <sub>1</sub> | 3.89(319)   | 0.2830 | HOMO→LUMO+1 (35%)<br>HOMO-1→LUMO (19%)<br>HOMO-1→LUMO+1 (12%)                    |
|                     | S <sub>0</sub> →S <sub>2</sub> | 4.09(303)   | 0.2739 | HOMO-3→LUMO (56%)                                                                |
|                     | S <sub>0</sub> →S <sub>3</sub> | 4.10(302)   | 1.0038 | HOMO-3→LUMO (19%)<br>HOMO-1→LUMO (18%)<br>HOMO→LUMO+1 (14%)<br>HOMO-2→LUMO (10%) |
|                     | S <sub>0</sub> →S <sub>4</sub> | 4.24(293)   | 0.2850 | HOMO→LUMO (27%)<br>HOMO-1→LUMO+1 (15%)<br>HOMO-2→LUMO (13%)                      |
|                     | S <sub>0</sub> →S <sub>5</sub> | 4.32(287)   | 0.0814 | HOMO→LUMO (56%)<br>HOMO-1→LUMO+1 (14%)                                           |
|                     | S <sub>0</sub> →S <sub>6</sub> | 4.37(284)   | 0.0022 | HOMO-4→LUMO (15%)<br>HOMO-6→LUMO+1 (10%)                                         |

**Table S15.** Summary of the DFT calculations (CAM-B3LYP/6-31G\*) in the ground state.

|                     | $E_{\text{HOMO}}^a$<br>(eV) | $E_{\text{LUMO}}^a$<br>(eV) | $E_{\text{gap}}^b$<br>(eV) | $E_{\text{TD-DFT}}^c$<br>(eV) |
|---------------------|-----------------------------|-----------------------------|----------------------------|-------------------------------|
| <b>MeBTT</b>        | -6.19                       | 0.01                        | 6.20                       | 4.02                          |
| <b>MeBTB</b>        | -6.21                       | -0.67                       | 5.54                       | 3.98                          |
| <b><i>p</i>-BTT</b> | -6.28                       | -0.33                       | 5.95                       | 4.02                          |
| <b><i>p</i>-BTB</b> | -6.28                       | -0.74                       | 5.54                       | 4.02                          |
| <b><i>m</i>-BTT</b> | -6.27                       | -0.37                       | 5.90                       | 3.78                          |
| <b><i>m</i>-BTB</b> | -6.30                       | -0.73                       | 5.57                       | 2.89                          |

<sup>a</sup> Obtained by DFT calculation (CAM-B3LYP/6-31G\*). <sup>b</sup> HOMO-LUMO energy gap:  $E_{\text{gap}} = E_{\text{LUMO}} - E_{\text{HOMO}}$ . <sup>c</sup>  $E_{\text{gap}} = E_{\text{LUMO}} - E_{\text{HOMO}}$  (CAM-B3LYP/6-31G\*). <sup>c</sup> Vertical excitation of the lowest transition ( $S_0 \rightarrow S_1$ ) calculated by TD-DFT (CAM-B3LYP/6-31G\*).

**Table S16.** Coordinates (Å) for the optimized structure (CAM-B3LYP/6-31G\*) of **MeBTT** in the ground state.

| Atom | X        | Y        | Z        | Atom | X        | Y        | Z        |
|------|----------|----------|----------|------|----------|----------|----------|
| C    | 0.513193 | 3.709554 | 0.541101 | C    | -10.0986 | -0.51886 | 0.877855 |
| C    | 0.355223 | 4.538031 | 1.638067 | H    | 3.149614 | 3.763845 | 3.411747 |
| O    | -0.75789 | 5.318935 | 1.652362 | H    | 1.182098 | 5.208049 | 3.533263 |
| O    | 0.757907 | 5.318882 | -1.65242 | H    | -1.18212 | 5.208032 | -3.53327 |
| C    | -0.35522 | 4.537997 | -1.63809 | H    | -3.14965 | 3.763819 | -3.41173 |
| C    | -0.51319 | 3.709556 | -0.54111 | H    | 1.162567 | 1.959141 | -1.43598 |
| C    | 1.658222 | 2.868992 | 0.464839 | H    | 3.130245 | 0.520873 | -1.52013 |
| C    | 2.621483 | 2.881731 | 1.511293 | H    | 4.48888  | 2.090431 | 2.23368  |
| C    | 2.416463 | 3.747163 | 2.610481 | H    | -4.48888 | 2.090421 | -2.23366 |
| C    | 1.314314 | 4.555739 | 2.679442 | H    | -3.13023 | 0.520903 | 1.520171 |
| C    | -1.31433 | 4.55571  | -2.67946 | H    | -1.16258 | 1.959159 | 1.436009 |
| C    | -2.41648 | 3.747145 | -2.61048 | H    | 5.209965 | -0.1227  | 2.392692 |
| C    | -2.62149 | 2.88172  | -1.51128 | H    | 7.206802 | -1.54064 | 2.273966 |
| C    | -1.65823 | 2.868995 | -0.46483 | H    | 7.37741  | -0.9439  | -1.96753 |
| C    | 1.889085 | 1.993872 | -0.63166 | H    | 5.41887  | 0.522484 | -1.84118 |
| C    | 2.9963   | 1.194127 | -0.67921 | H    | -5.41882 | 0.522382 | 1.841225 |
| C    | 3.965885 | 1.199313 | 0.362662 | H    | -7.37735 | -0.944   | 1.967568 |

|   |          |          |          |   |          |          |          |
|---|----------|----------|----------|---|----------|----------|----------|
| C | 3.759018 | 2.040802 | 1.430297 | H | -7.20687 | -1.54053 | -2.27397 |
| C | -3.75902 | 2.040801 | -1.43027 | H | -5.21004 | -0.1226  | -2.39269 |
| C | -3.96589 | 1.199315 | -0.36263 | H | 9.947832 | -3.85246 | -1.48511 |
| C | -2.99631 | 1.194146 | 0.679235 | H | 9.615439 | 0.249069 | -0.28343 |
| C | -1.88909 | 1.993897 | 0.631678 | H | 11.47955 | 0.842429 | -1.78621 |
| C | 5.157163 | 0.320451 | 0.287212 | H | 12.61084 | -0.9137  | -3.13231 |
| C | 5.688956 | -0.28265 | 1.431844 | H | 11.83495 | -3.26849 | -2.9629  |
| C | 6.813224 | -1.09145 | 1.368704 | H | -10.6981 | -3.06425 | -1.42387 |
| C | 7.437946 | -1.34608 | 0.144417 | H | -10.8238 | -5.12601 | -2.77346 |
| C | 6.907572 | -0.75885 | -1.00777 | H | -8.83246 | -6.59448 | -3.0046  |
| C | 5.794307 | 0.06431  | -0.93147 | H | -6.72052 | -5.97579 | -1.85027 |
| C | -5.79428 | 0.064253 | 0.931507 | H | -6.60894 | -3.93139 | -0.47382 |
| C | -6.90754 | -0.75891 | 1.007796 | H | -11.4795 | 0.842424 | 1.786309 |
| C | -7.43795 | -1.34608 | -0.1444  | H | -12.6109 | -0.91373 | 3.132303 |
| C | -6.81327 | -1.09139 | -1.36869 | H | -11.835  | -3.26854 | 2.962795 |
| C | -5.689   | -0.28259 | -1.43183 | H | -9.94792 | -3.85249 | 1.485011 |
| C | -5.15717 | 0.320453 | -0.28718 | H | -9.61538 | 0.24908  | 0.283525 |
| N | 8.578533 | -2.18061 | 0.073258 | C | 8.645549 | -3.35992 | 0.857725 |
| N | -8.57854 | -2.18062 | -0.07326 | C | 7.529373 | -4.19165 | 0.985306 |
| C | 9.655263 | -1.8413  | -0.78435 | C | 9.829921 | -3.70819 | 1.513324 |
| C | -8.64554 | -3.35992 | -0.85773 | C | 7.597444 | -5.34177 | 1.761194 |
| C | -9.65527 | -1.84131 | 0.78435  | H | 6.608963 | -3.93143 | 0.473815 |
| C | 10.29043 | -2.82525 | -1.54749 | C | 9.895466 | -4.86992 | 2.271939 |
| C | 10.09863 | -0.51886 | -0.8778  | H | 10.69813 | -3.06422 | 1.423867 |
| C | 11.14888 | -0.18995 | -1.72524 | C | 8.780314 | -5.69138 | 2.405202 |
| C | 11.78571 | -1.17267 | -2.47682 | H | 6.720587 | -5.97584 | 1.850239 |
| C | 11.35242 | -2.49122 | -2.37817 | H | 10.8238  | -5.12599 | 2.77343  |
| C | -9.8299  | -3.7082  | -1.51334 | H | 8.832536 | -6.5945  | 3.00456  |
| C | -9.89542 | -4.86993 | -2.27196 | C | -0.97818 | 6.177833 | 2.756413 |
| C | -8.78025 | -5.69137 | -2.40523 | H | -1.07055 | 5.615992 | 3.692337 |
| C | -7.59739 | -5.34174 | -1.76122 | H | -0.17869 | 6.920142 | 2.85572  |
| C | -7.52934 | -4.19163 | -0.98532 | H | -1.91847 | 6.689888 | 2.552246 |
| C | -11.1489 | -0.18996 | 1.725295 | C | 0.978147 | 6.177837 | -2.75643 |
| C | -11.7857 | -1.1727  | 2.476816 | H | 1.918467 | 6.689851 | -2.55229 |
| C | -11.3525 | -2.49126 | 2.378112 | H | 1.070448 | 5.616055 | -3.6924  |
| C | -10.2905 | -2.82528 | 1.547431 | H | 0.178658 | 6.920165 | -2.85564 |

**Table S17.** Coordinates (Å) for the optimized structure (CAM-B3LYP/6-31G\*) of **MeBTB** in the ground state.

| Atom | X        | Y        | Z        | Atom | X        | Y        | Z        |
|------|----------|----------|----------|------|----------|----------|----------|
| C    | 1.763917 | 3.786381 | 0.321871 | 1    | -0.07261 | 2.263775 | 1.313797 |
| C    | 1.608876 | 4.66022  | 1.383823 | 1    | 6.311884 | -0.10303 | 2.421381 |
| O    | 0.520793 | 5.474801 | 1.344353 | H    | 8.267873 | -1.58056 | 2.397173 |
| O    | 2.192508 | 5.165731 | -1.99699 | H    | 8.522426 | -1.17259 | -1.86258 |
| C    | 1.01388  | 4.491265 | -1.94359 | H    | 6.606542 | 0.353448 | -1.8319  |
| C    | 0.762528 | 3.779471 | -0.78331 | H    | -4.43661 | 1.261149 | 1.736628 |
| C    | 2.882741 | 2.907715 | 0.303347 | H    | -6.55084 | 0.037251 | 1.924309 |
| C    | 3.824387 | 2.932109 | 1.36893  | H    | -6.32859 | -0.99425 | -2.22993 |
| C    | 3.623754 | 3.844799 | 2.430158 | H    | -4.22582 | 0.251116 | -2.42849 |
| C    | 2.545885 | 4.688028 | 2.444988 | H    | 10.99415 | -4.13252 | -1.21392 |
| C    | 0.078654 | 4.503519 | -3.00686 | H    | 10.76891 | 0.026462 | -0.19954 |
| C    | -1.09371 | 3.806556 | -2.89666 | H    | 12.66929 | 0.497432 | -1.70031 |
| C    | -1.39439 | 3.061234 | -1.73325 | H    | 13.76481 | -1.34932 | -2.95135 |
| C    | -0.45434 | 3.052322 | -0.6658  | H    | 12.91699 | -3.67051 | -2.68906 |
| C    | 3.10736  | 1.981871 | -0.75184 | H    | -10.5996 | -3.44638 | -3.38044 |
| C    | 4.189703 | 1.14749  | -0.74453 | H    | -6.99426 | -5.44058 | -2.2586  |
| C    | 5.139246 | 1.166033 | 0.315478 | H    | -10.7252 | 1.638131 | 2.403719 |
| C    | 4.937068 | 2.055113 | 1.344764 | H    | -10.5599 | -2.38016 | 3.839047 |
| C    | -2.60342 | 2.333491 | -1.61133 | C    | 9.679168 | -3.49614 | 1.088581 |
| C    | -2.90322 | 1.609604 | -0.48123 | C    | 8.538861 | -4.29049 | 1.238934 |
| C    | -1.95694 | 1.606223 | 0.58159  | C    | 10.84481 | -3.84488 | 1.77666  |
| C    | -0.7807  | 2.296131 | 0.493258 | C    | 8.564785 | -5.40366 | 2.069359 |
| C    | 6.305058 | 0.250707 | 0.298308 | H    | 7.632831 | -4.03013 | 0.702442 |
| C    | 6.800929 | -0.31761 | 1.476383 | C    | 10.86815 | -4.97047 | 2.590268 |
| C    | 7.901969 | -1.16007 | 1.466891 | H    | 11.73162 | -3.22961 | 1.669455 |
| C    | 8.538317 | -1.48506 | 0.265382 | C    | 9.728953 | -5.75404 | 2.74621  |
| C    | 8.043363 | -0.93308 | -0.91958 | H    | 7.669611 | -6.00883 | 2.175572 |
| C    | 6.953743 | -0.07581 | -0.89725 | H    | 11.78241 | -5.22745 | 3.116545 |
| C    | -4.84407 | 0.762173 | 0.862815 | H    | 9.748185 | -6.6286  | 3.388372 |
| C    | -6.0427  | 0.072313 | 0.964814 | B    | -7.96123 | -1.37162 | -0.01268 |
| C    | -6.61787 | -0.58121 | -0.13678 | C    | -9.07124 | 1.433613 | 0.355928 |
| C    | -5.92538 | -0.49184 | -1.35524 | H    | -8.14974 | 1.929521 | 0.678136 |
| C    | -4.73902 | 0.215778 | -1.47252 | H    | -8.90245 | 1.089267 | -0.66644 |
| C    | -4.17303 | 0.854978 | -0.36258 | H    | -9.85899 | 2.191711 | 0.326429 |



|   |          |          |          |   |          |          |          |
|---|----------|----------|----------|---|----------|----------|----------|
| N | 9.655112 | -2.35369 | 0.248961 | C | -8.90364 | -3.40389 | 2.039056 |
| C | 10.75275 | -2.08439 | -0.60718 | H | -9.13095 | -3.87245 | 1.078416 |
| C | -8.27583 | -2.51312 | -1.06188 | H | -7.81973 | -3.47236 | 2.181831 |
| C | -8.95946 | -1.00278 | 1.157962 | H | -9.37221 | -4.00008 | 2.826366 |
| C | 11.36811 | -3.1196  | -1.31682 | C | -11.6728 | 0.037947 | 4.39307  |
| C | 11.23663 | -0.781   | -0.75245 | H | -12.3572 | -0.78298 | 4.626437 |
| C | 12.30714 | -0.52107 | -1.59853 | H | -11.111  | 0.26034  | 5.307916 |
| C | 12.92392 | -1.55456 | -2.29686 | H | -12.2687 | 0.922637 | 4.152765 |
| C | 12.45029 | -2.85419 | -2.14621 | C | -10.4528 | -1.35973 | -1.75072 |
| C | -9.44851 | -2.48444 | -1.85173 | H | -10.8311 | -1.24234 | -0.73238 |
| C | -9.69479 | -3.4943  | -2.77869 | H | -10.0158 | -0.39905 | -2.04435 |
| C | -8.8244  | -4.56727 | -2.9488  | H | -11.3051 | -1.54261 | -2.41023 |
| C | -7.6812  | -4.60291 | -2.15907 | 6 | -6.10386 | -3.73751 | -0.44861 |
| C | -7.38672 | -3.59609 | -1.23984 | H | -5.27642 | -3.21203 | -0.93667 |
| C | -10.3395 | 0.623587 | 2.330559 | H | -6.1806  | -3.3331  | 0.562645 |
| C | -10.7452 | -0.32386 | 3.262905 | H | -5.82052 | -4.79061 | -0.36591 |
| C | -10.2525 | -1.61868 | 3.12574  | C | -9.10588 | -5.64205 | -3.96572 |
| C | -9.38584 | -1.97272 | 2.094778 | H | -8.74222 | -5.35041 | -4.95807 |
| C | -9.4513  | 0.313428 | 1.300682 | H | -8.61252 | -6.58132 | -3.70092 |
| H | 4.340606 | 3.87005  | 3.245821 | H | -10.179  | -5.83305 | -4.05832 |
| H | 2.416136 | 5.375984 | 3.270747 | C | 0.305003 | 6.382567 | 2.409604 |
| H | 0.284595 | 5.065061 | -3.90917 | H | -0.61464 | 6.914347 | 2.165741 |
| H | -1.80908 | 3.819247 | -3.71382 | H | 0.176414 | 5.860896 | 3.364291 |
| H | 2.395233 | 1.935248 | -1.56831 | H | 1.125014 | 7.103658 | 2.497219 |
| H | 4.318222 | 0.436463 | -1.55465 | C | 2.511289 | 5.899759 | -3.16556 |
| H | 5.651985 | 2.115225 | 2.160746 | H | 2.569302 | 5.250582 | -4.04601 |
| H | -3.31184 | 2.378159 | -2.43374 | H | 1.785214 | 6.698902 | -3.35016 |
| H | -2.16559 | 1.021516 | 1.471877 | H | 3.490518 | 6.341449 | -2.98133 |

**Table S18.** Coordinates (Å) for the optimized structure (CAM-B3LYP/6-31G\*) of *p*-**BTT** in the ground state.

| Atom | X       | Y       | Z       | Atom | X       | Y       | Z       |
|------|---------|---------|---------|------|---------|---------|---------|
| C    | 0       | 7.68611 | 0       | C    | 10.1571 | -2.8144 | -3.2259 |
| C    | -0.6406 | 4.74429 | -0.3781 | C    | 9.56677 | -3.9562 | -2.6932 |
| C    | -0.9364 | 5.85542 | -1.1398 | C    | 8.6878  | -3.8618 | -1.6217 |
| O    | -0.0444 | 6.90768 | -1.1734 | C    | 9.00212 | -1.4732 | -1.5837 |
| O    | 0.04444 | 6.90767 | 1.1734  | H    | -0.8959 | 8.30517 | 0.10403 |

|   |         |         |         |   |         |         |         |
|---|---------|---------|---------|---|---------|---------|---------|
| C | 0.93639 | 5.85542 | 1.13978 | H | 0.89588 | 8.30517 | -0.104  |
| C | 0.64061 | 4.74429 | 0.37809 | H | -3.8883 | 4.96291 | -2.5471 |
| C | -1.6119 | 3.69462 | -0.3109 | H | -2.2509 | 6.83839 | -2.5284 |
| C | -2.7838 | 3.77505 | -1.1152 | H | 2.25088 | 6.83839 | 2.52839 |
| C | -2.9927 | 4.91345 | -1.9351 | H | 3.88828 | 4.9629  | 2.54706 |
| C | -2.0981 | 5.94618 | -1.9311 | H | -0.6278 | 2.5096  | 1.21219 |
| C | 2.09808 | 5.94617 | 1.93106 | H | -2.3084 | 0.75645 | 1.26934 |
| C | 2.99272 | 4.91345 | 1.93506 | H | -4.6325 | 2.82982 | -1.678  |
| C | 2.78382 | 3.77505 | 1.11519 | H | 4.63246 | 2.82981 | 1.67801 |
| C | 1.61188 | 3.69462 | 0.31092 | H | 2.30838 | 0.75645 | -1.2693 |
| C | -1.4912 | 2.58094 | 0.56209 | H | 0.62775 | 2.5096  | -1.2122 |
| C | -2.4438 | 1.60057 | 0.60089 | H | -5.0441 | 0.61591 | -2.2897 |
| C | -3.596  | 1.64904 | -0.2294 | H | -6.7464 | -1.1449 | -2.2077 |
| C | -3.7436 | 2.73471 | -1.061  | H | -6.094  | -1.5776 | 2.00789 |
| C | 3.74361 | 2.7347  | 1.06096 | H | -4.4364 | 0.22245 | 1.9373  |
| C | 3.59603 | 1.64903 | 0.22943 | H | 4.43639 | 0.22245 | -1.9373 |
| C | 2.4438  | 1.60057 | -0.6009 | H | 6.09398 | -1.5776 | -2.0079 |
| C | 1.49119 | 2.58094 | -0.5621 | H | 6.74635 | -1.1449 | 2.20768 |
| C | -4.6071 | 0.56635 | -0.1825 | H | 5.04405 | 0.61591 | 2.28966 |
| C | -5.2793 | 0.15191 | -1.3369 | H | -8.2196 | -4.7532 | 1.21838 |
| C | -6.2373 | -0.8491 | -1.2971 | H | -8.7893 | -0.5054 | 1.14265 |
| C | -6.5453 | -1.4916 | -0.0939 | H | -10.323 | -0.6745 | 3.06784 |
| C | -5.8708 | -1.0926 | 1.06408 | H | -10.838 | -2.8905 | 4.06769 |
| C | -4.9272 | -0.0779 | 1.01689 | H | -9.7801 | -4.9305 | 3.12211 |
| C | 4.92724 | -0.0779 | -1.0169 | H | 9.75262 | -3.4144 | 1.18041 |
| C | 5.87075 | -1.0926 | -1.0641 | H | 9.91771 | -5.0644 | 3.00806 |
| C | 6.54533 | -1.4916 | 0.09385 | H | 7.86034 | -6.0387 | 4.00436 |
| C | 6.23733 | -0.8491 | 1.29705 | H | 5.63814 | -5.3506 | 3.13078 |
| C | 5.2793  | 0.15191 | 1.33693 | H | 5.47857 | -3.7267 | 1.27994 |
| C | 4.60711 | 0.56635 | 0.18255 | H | 10.3234 | -0.6745 | -3.0678 |
| N | -7.5135 | -2.5205 | -0.0495 | H | 10.8377 | -2.8905 | -4.0677 |
| N | 7.5135  | -2.5206 | 0.04948 | H | 9.78007 | -4.9305 | -3.1221 |
| C | -8.4004 | -2.6178 | 1.05337 | H | 8.21957 | -4.7532 | -1.2184 |
| C | 7.60488 | -3.4601 | 1.10833 | H | 8.78926 | -0.5054 | -1.1426 |
| C | 8.4004  | -2.6178 | -1.0534 | C | -7.6049 | -3.4601 | -1.1083 |
| C | -8.6878 | -3.8618 | 1.62171 | C | -6.4501 | -4.0157 | -1.6662 |
| C | -9.0021 | -1.4732 | 1.58374 | C | -8.8528 | -3.8459 | -1.6054 |
| C | -9.8653 | -1.5738 | 2.66738 | C | -6.5452 | -4.9297 | -2.7079 |

|   |         |         |         |   |         |         |         |
|---|---------|---------|---------|---|---------|---------|---------|
| C | -10.157 | -2.8144 | 3.22593 | H | -5.4786 | -3.7267 | -1.2799 |
| C | -9.5668 | -3.9562 | 2.6932  | C | -8.9403 | -4.7749 | -2.6344 |
| C | 8.85279 | -3.8459 | 1.6054  | H | -9.7526 | -3.4144 | -1.1804 |
| C | 8.94028 | -4.7749 | 2.63438 | C | -7.789  | -5.3188 | -3.1955 |
| C | 7.78902 | -5.3188 | 3.19555 | H | -5.6381 | -5.3506 | -3.1308 |
| C | 6.54523 | -4.9297 | 2.70788 | H | -9.9177 | -5.0645 | -3.0081 |
| C | 6.45006 | -4.0157 | 1.66624 | H | -7.8603 | -6.0387 | -4.0043 |
| C | 9.86529 | -1.5738 | -2.6674 |   |         |         |         |

**Table S19.** Coordinates (Å) for the optimized structure (CAM-B3LYP/6-31G\*) of *p*-BTB in the ground state.

| Atom | X        | Y        | Z        | Atom | X        | Y        | Z        |
|------|----------|----------|----------|------|----------|----------|----------|
| C    | 1.756593 | 7.925283 | -0.08356 | H    | 1.833297 | 2.698794 | -1.24031 |
| C    | 2.076259 | 4.935653 | 0.327897 | H    | 3.319882 | 0.778357 | -1.2728  |
| C    | 2.484978 | 6.016873 | 1.080179 | H    | 5.837938 | 2.62368  | 1.665522 |
| O    | 1.709931 | 7.158395 | 1.097459 | H    | -3.36186 | 3.576002 | -1.73838 |
| O    | 1.633807 | 7.14293  | -1.24964 | H    | -1.28996 | 1.30166  | 1.248253 |
| C    | 0.634497 | 6.193011 | -1.21046 | H    | 0.573285 | 2.860145 | 1.176521 |
| C    | 0.806309 | 5.064658 | -0.43601 | H    | 6.017408 | 0.386277 | 2.296321 |
| C    | 2.930776 | 3.788159 | 0.276265 | H    | 7.532604 | -1.53839 | 2.233595 |
| C    | 4.101009 | 3.752517 | 1.086074 | H    | 6.847965 | -1.93851 | -1.97899 |
| C    | 4.425401 | 4.870452 | 1.896423 | H    | 5.381134 | 0.020589 | -1.9279  |
| C    | 3.645548 | 5.991843 | 1.877541 | H    | -3.46557 | 1.040452 | 1.916654 |
| C    | -0.50689 | 6.399686 | -2.00938 | H    | -5.34617 | -0.52771 | 2.010264 |
| C    | -1.5075  | 5.469932 | -2.0075  | H    | -5.85895 | -0.17614 | -2.22938 |
| C    | -1.42545 | 4.325026 | -1.17456 | H    | -3.99324 | 1.413357 | -2.32504 |
| C    | -0.27256 | 4.126558 | -0.36335 | H    | 8.649946 | -5.30685 | -1.15029 |
| C    | 2.696516 | 2.68496  | -0.58677 | H    | 9.62806  | -1.13431 | -1.12263 |
| C    | 3.540581 | 1.609658 | -0.61171 | H    | 11.14043 | -1.47424 | -3.04164 |
| C    | 4.688529 | 1.545215 | 0.223235 | H    | 11.43872 | -3.74034 | -4.01403 |
| C    | 4.946454 | 2.616841 | 1.045789 | H    | 10.18814 | -5.65647 | -3.04758 |
| C    | -2.49149 | 3.394568 | -1.11534 | H    | -9.98692 | -2.82023 | -3.45101 |
| C    | -2.46419 | 2.311319 | -0.2687  | H    | -6.03585 | -4.42513 | -3.65719 |
| C    | -1.32886 | 2.146522 | 0.569127 | H    | -9.47495 | 0.087679 | 3.656733 |
| C    | -0.27519 | 3.016344 | 0.522367 | H    | -8.54311 | -4.07894 | 3.619673 |
| C    | 5.582231 | 0.36332  | 0.188946 | C    | 8.15522  | -3.93637 | 1.156626 |
| C    | 6.206189 | -0.1073  | 1.348643 | C    | 6.949119 | -4.36817 | 1.715215 |
| C    | 7.058085 | -1.20008 | 1.319646 | C    | 9.356876 | -4.44053 | 1.661258 |
| C    | 7.301554 | -1.88029 | 0.122609 | C    | 6.949738 | -5.27737 | 2.764947 |

|   |          |          |          |   |          |          |          |
|---|----------|----------|----------|---|----------|----------|----------|
| C | 6.672795 | -1.42548 | -1.04035 | H | 6.01296  | -3.98661 | 1.323207 |
| C | 5.837068 | -0.32029 | -1.00417 | C | 9.347979 | -5.36406 | 2.698403 |
| C | -3.98297 | 0.771791 | 1.001438 | H | 10.29603 | -4.10557 | 1.235335 |
| C | -5.05017 | -0.11194 | 1.051844 | C | 8.146808 | -5.78457 | 3.260089 |
| C | -5.75943 | -0.48321 | -0.10132 | H | 6.004511 | -5.6014  | 3.18849  |
| C | -5.34471 | 0.094344 | -1.31202 | H | 10.28995 | -5.74676 | 3.077987 |
| C | -4.29408 | 0.996837 | -1.36922 | H | 8.143519 | -6.50043 | 4.075006 |
| C | -3.59083 | 1.349698 | -0.21149 | B | -6.953   | -1.49306 | -0.03956 |
| N | 8.161116 | -3.00197 | 0.089354 | C | -8.27774 | 0.816516 | 1.418967 |
| C | 9.036139 | -3.19753 | -1.00975 | H | -7.38479 | 1.352465 | 1.754611 |
| C | -7.35263 | -2.28395 | -1.34993 | H | -8.2649  | 0.835357 | 0.32835  |
| C | -7.71732 | -1.6861  | 1.331814 | H | -9.14791 | 1.387132 | 1.75233  |
| C | 9.202384 | -4.47007 | -1.56285 | C | -7.1874  | -4.18766 | 1.343351 |
| C | 9.746741 | -2.12299 | -1.55164 | H | -7.50587 | -4.34342 | 0.310946 |
| C | 10.59705 | -2.31961 | -2.63185 | H | -6.0948  | -4.11726 | 1.336741 |
| C | 10.76797 | -3.58882 | -3.17518 | H | -7.45012 | -5.0779  | 1.918611 |
| C | 10.06945 | -4.66152 | -2.63063 | C | -9.78838 | -2.18597 | 5.121605 |
| C | -8.65805 | -2.20692 | -1.88792 | H | -10.2991 | -3.15063 | 5.177716 |
| C | -8.9786  | -2.90065 | -3.05233 | H | -9.07698 | -2.14772 | 5.953707 |
| C | -8.0512  | -3.70166 | -3.71218 | H | -10.5262 | -1.3974  | 5.286291 |
| C | -6.77348 | -3.79019 | -3.17213 | C | -9.73373 | -1.35599 | -1.25511 |
| C | -6.40765 | -3.08963 | -2.02323 | H | -9.88663 | -1.61006 | -0.20449 |
| C | -8.99795 | -0.76965 | 3.187701 | H | -9.48156 | -0.29148 | -1.29578 |
| C | -9.08467 | -2.0133  | 3.801908 | H | -10.6841 | -1.4832  | -1.77768 |
| C | -8.48421 | -3.09421 | 3.162468 | C | -4.98418 | -3.25359 | -1.53674 |
| C | -7.81869 | -2.95537 | 1.947114 | H | -4.33532 | -2.47063 | -1.94046 |
| C | -8.31772 | -0.58669 | 1.983982 | H | -4.89859 | -3.20449 | -0.45026 |
| H | 2.714844 | 8.442911 | -0.18843 | H | -4.57881 | -4.21539 | -1.85995 |
| H | 0.932858 | 8.639635 | 0.008172 | C | -8.41663 | -4.43215 | -4.97687 |
| H | 5.317716 | 4.831044 | 2.513075 | H | -8.27633 | -3.79172 | -5.85446 |
| H | 3.888978 | 6.86862  | 2.466921 | H | -7.79532 | -5.31956 | -5.11856 |
| H | -0.55958 | 7.296505 | -2.6162  | H | -9.4639  | -4.7444  | -4.9685  |
| H | -2.38944 | 5.608773 | -2.62461 |   |          |          |          |

**Table S20.** Coordinates (Å) for the optimized structure (CAM-B3LYP/6-31G\*) of *m*-BTT in the ground state.

| Atom | X        | Y        | Z        | Atom | X        | Y        | Z        |
|------|----------|----------|----------|------|----------|----------|----------|
| C    | -7.35838 | -2.92396 | -0.28558 | H    | -0.04232 | -1.30759 | 0.297542 |
| C    | -4.59984 | -1.97252 | 0.546896 | C    | 2.838359 | -2.86919 | -0.58951 |

|   |          |          |          |   |          |          |          |
|---|----------|----------|----------|---|----------|----------|----------|
| C | -5.42601 | -2.95519 | 1.051792 | H | 3.160416 | -3.84003 | -2.48215 |
| O | -6.25053 | -3.65129 | 0.191746 | H | 2.190085 | -1.81876 | 1.172633 |
| O | -7.01716 | -1.62592 | -0.71313 | N | 4.125959 | -3.16149 | -0.08599 |
| C | -5.88665 | -1.5544  | -1.50139 | N | 0.808315 | 5.137364 | 0.285017 |
| C | -4.64724 | -1.71636 | -0.91822 | C | 5.256636 | -3.09967 | -0.94043 |
| C | -3.80054 | -1.22286 | 1.471614 | C | 5.406535 | -2.04432 | -1.84449 |
| C | -3.79664 | -1.59698 | 2.845343 | C | 6.238749 | -4.09247 | -0.88635 |
| C | -4.6137  | -2.66595 | 3.287735 | C | 6.512094 | -1.99265 | -2.68384 |
| C | -5.43385 | -3.32026 | 2.411891 | H | 4.651854 | -1.26632 | -1.88606 |
| C | -6.0537  | -1.26989 | -2.87052 | C | 7.351018 | -4.02354 | -1.71562 |
| C | -4.95356 | -1.17526 | -3.67604 | H | 6.125588 | -4.91706 | -0.1908  |
| C | -3.65758 | -1.4055  | -3.15288 | C | 7.49303  | -2.97764 | -2.62227 |
| C | -3.49329 | -1.69664 | -1.76893 | H | 6.612402 | -1.16669 | -3.38139 |
| C | -3.03342 | -0.09502 | 1.082421 | H | 8.10517  | -4.80263 | -1.66006 |
| C | -2.26392 | 0.613838 | 1.978621 | H | 8.359377 | -2.93051 | -3.27404 |
| C | -2.24115 | 0.1986   | 3.337802 | C | 4.295044 | -3.5168  | 1.276883 |
| C | -2.98821 | -0.86641 | 3.753186 | C | 3.407535 | -4.40196 | 1.895222 |
| C | -2.51196 | -1.37654 | -3.98853 | C | 5.355255 | -2.98886 | 2.018811 |
| C | -1.26746 | -1.64485 | -3.49397 | C | 3.574206 | -4.74128 | 3.231822 |
| C | -1.08785 | -1.97497 | -2.12346 | H | 2.58687  | -4.82127 | 1.323248 |
| C | -2.19058 | -2.00175 | -1.29893 | C | 5.52621  | -3.34796 | 3.349748 |
| H | -8.10886 | -2.77749 | 0.496766 | H | 6.044219 | -2.297   | 1.546416 |
| H | -7.75917 | -3.52416 | -1.10765 | C | 4.63564  | -4.2214  | 3.966218 |
| H | -4.59675 | -2.94116 | 4.337986 | H | 2.874906 | -5.42928 | 3.697034 |
| H | -6.08908 | -4.12367 | 2.730114 | H | 6.355887 | -2.92951 | 3.911314 |
| H | -7.05848 | -1.12562 | -3.2522  | H | 4.767526 | -4.49436 | 5.008181 |
| H | -5.06143 | -0.94718 | -4.73221 | C | 0.169441 | 6.372113 | 0.003133 |
| H | -3.04753 | 0.208838 | 0.043234 | C | -0.83322 | 6.861343 | 0.84506  |
| H | -2.98861 | -1.15983 | 4.799079 | C | 0.537974 | 7.118594 | -1.11944 |
| H | -2.64305 | -1.13369 | -5.03917 | C | -1.45969 | 8.068039 | 0.560612 |
| H | -2.06714 | -2.29095 | -0.26273 | H | -1.119   | 6.290724 | 1.722147 |
| H | -1.6511  | 0.758221 | 4.05599  | C | -0.07995 | 8.333642 | -1.38654 |
| H | -0.40268 | -1.59516 | -4.14742 | H | 1.311342 | 6.741643 | -1.77998 |
| C | -1.47379 | 1.791183 | 1.543941 | C | -1.08494 | 8.813963 | -0.55265 |
| C | -0.21288 | 2.055976 | 2.088232 | H | -2.23759 | 8.432956 | 1.22432  |
| C | -1.95651 | 2.67468  | 0.573129 | H | 0.219213 | 8.901513 | -2.26224 |
| C | 0.533429 | 3.152765 | 1.685764 | H | -1.57104 | 9.759961 | -0.76799 |
| H | 0.201326 | 1.388156 | 2.837195 | C | 2.215461 | 5.026788 | 0.143794 |
| C | -1.21066 | 3.764446 | 0.151796 | C | 2.782535 | 3.898092 | -0.45464 |
| H | -2.93885 | 2.512338 | 0.140989 | C | 3.053999 | 6.048237 | 0.598471 |

|   |          |          |          |   |          |          |          |
|---|----------|----------|----------|---|----------|----------|----------|
| C | 0.047198 | 4.022905 | 0.705312 | C | 4.1615   | 3.792166 | -0.58378 |
| H | 1.506177 | 3.334874 | 2.128887 | H | 2.13738  | 3.104751 | -0.81647 |
| H | -1.60824 | 4.428374 | -0.60775 | C | 4.430947 | 5.943427 | 0.448148 |
| C | 0.262973 | -2.28213 | -1.59768 | H | 2.620498 | 6.924199 | 1.068866 |
| C | 1.201244 | -2.97865 | -2.3662  | C | 4.994048 | 4.814333 | -0.13847 |
| C | 0.647529 | -1.88207 | -0.31332 | H | 4.585577 | 2.907801 | -1.04948 |
| C | 2.461543 | -3.27812 | -1.8725  | H | 5.067815 | 6.746743 | 0.805801 |
| H | 0.931837 | -3.32677 | -3.3586  | H | 6.070551 | 4.731879 | -0.24766 |
| C | 1.911424 | -2.16107 | 0.182146 |   |          |          |          |

**Table S21.** Coordinates (Å) for the optimized structure (CAM-B3LYP/6-31G\*) of *m*-BTB in the ground state.

| Atom | X        | Y        | Z        | Atom | X        | Y        | Z        |
|------|----------|----------|----------|------|----------|----------|----------|
| C    | 8.516884 | -1.03291 | -0.29316 | H    | -2.82228 | 2.866906 | -1.91097 |
| C    | 5.685136 | -0.33261 | 0.558856 | C    | -4.41234 | 6.382642 | -2.05454 |
| C    | 6.917932 | 0.119545 | 0.984158 | H    | -2.86847 | 6.973721 | -0.68019 |
| O    | 7.956878 | 0.204142 | 0.08055  | C    | -4.95624 | 5.351393 | -2.81403 |
| O    | 7.539524 | -2.0009  | -0.59259 | H    | -4.78556 | 3.272925 | -3.3463  |
| C    | 6.513675 | -1.55532 | -1.40114 | H    | -4.85161 | 7.374957 | -2.08959 |
| C    | 5.549163 | -0.72169 | -0.87246 | H    | -5.82447 | 5.529326 | -3.44011 |
| C    | 4.640645 | -0.45085 | 1.534919 | C    | -1.51947 | 5.225506 | 0.924889 |
| C    | 4.876343 | 0.002967 | 2.864034 | C    | -0.31912 | 5.75866  | 1.403092 |
| C    | 6.148702 | 0.512461 | 3.220223 | C    | -2.65038 | 5.254416 | 1.745562 |
| C    | 7.159991 | 0.551781 | 2.302395 | C    | -0.25267 | 6.300682 | 2.680132 |
| C    | 6.477676 | -2.02017 | -2.7298  | H    | 0.560395 | 5.745    | 0.768322 |
| C    | 5.462783 | -1.62197 | -3.55336 | C    | -2.58038 | 5.815577 | 3.014431 |
| C    | 4.475454 | -0.71827 | -3.09105 | H    | -3.58332 | 4.835641 | 1.384243 |
| C    | 4.520082 | -0.24165 | -1.74976 | C    | -1.38228 | 6.337665 | 3.491903 |
| C    | 3.373973 | -1.01671 | 1.23932  | H    | 0.687988 | 6.709541 | 3.036261 |
| C    | 2.361217 | -1.07086 | 2.170864 | H    | -3.46859 | 5.831018 | 3.638672 |
| C    | 2.604107 | -0.58144 | 3.482053 | H    | -1.32939 | 6.768932 | 4.486285 |
| C    | 3.827926 | -0.07631 | 3.816172 | C    | -3.18202 | -4.43079 | 0.054039 |
| C    | 3.440653 | -0.2646  | -3.94812 | C    | -2.87143 | -5.50425 | 0.918025 |
| C    | 2.496493 | 0.620299 | -3.51222 | C    | -3.68237 | -4.73992 | -1.23199 |
| C    | 2.540125 | 1.130969 | -2.18695 | C    | -3.07071 | -6.82029 | 0.502008 |
| C    | 3.550617 | 0.713241 | -1.34923 | C    | -3.84092 | -6.06756 | -1.6218  |
| H    | 9.109173 | -1.46677 | 0.517866 | C    | -3.54282 | -7.12671 | -0.7691  |
| H    | 9.142906 | -0.81123 | -1.16247 | H    | -2.84928 | -7.62966 | 1.194278 |
| H    | 6.312436 | 0.854831 | 4.237513 | H    | -4.2178  | -6.28139 | -2.61944 |

|   |          |          |          |   |          |          |          |
|---|----------|----------|----------|---|----------|----------|----------|
| H | 8.149124 | 0.918279 | 2.554058 | C | -4.13111 | -1.86165 | 0.482707 |
| H | 7.258137 | -2.69441 | -3.06486 | C | -3.98653 | -0.65614 | -0.23544 |
| H | 5.410761 | -1.97862 | -4.57764 | C | -5.33949 | -2.06958 | 1.190802 |
| H | 3.188468 | -1.38633 | 0.23897  | C | -5.017   | 0.286263 | -0.2422  |
| H | 4.01978  | 0.271199 | 4.827196 | C | -6.33438 | -1.0975  | 1.179179 |
| H | 3.406004 | -0.64627 | -4.96453 | C | -6.19633 | 0.090759 | 0.463456 |
| H | 3.615605 | 1.132883 | -0.35335 | H | -4.88812 | 1.202409 | -0.81513 |
| H | 1.817493 | -0.63927 | 4.227067 | H | -7.24841 | -1.27314 | 1.742283 |
| H | 1.693915 | 0.925853 | -4.17524 | B | -2.96881 | -2.93325 | 0.51131  |
| C | 1.022444 | -1.58935 | 1.798868 | C | -2.75016 | -0.32287 | -1.04361 |
| C | -0.13459 | -0.9521  | 2.261964 | H | -2.05489 | 0.301229 | -0.47107 |
| C | 0.876842 | -2.69182 | 0.949609 | H | -2.19335 | -1.20597 | -1.36044 |
| C | -1.38893 | -1.37928 | 1.853679 | H | -3.02465 | 0.236315 | -1.94348 |
| H | -0.04684 | -0.08879 | 2.91471  | C | -5.57953 | -3.3191  | 2.006407 |
| C | -0.38355 | -3.13191 | 0.573585 | H | -5.48986 | -4.22363 | 1.399796 |
| H | 1.759808 | -3.21629 | 0.597431 | H | -4.86136 | -3.41114 | 2.828605 |
| C | -1.55248 | -2.47999 | 0.998418 | H | -6.57885 | -3.3054  | 2.449172 |
| H | -2.26733 | -0.84188 | 2.1989   | C | -7.30025 | 1.115424 | 0.447219 |
| H | -0.46805 | -3.99879 | -0.0756  | H | -7.61946 | 1.372413 | 1.462511 |
| C | 1.494858 | 2.06977  | -1.71487 | H | -6.98242 | 2.03508  | -0.05101 |
| C | 0.927432 | 3.022731 | -2.5674  | H | -8.18352 | 0.737913 | -0.08017 |
| C | 1.017504 | 2.009352 | -0.40097 | C | -4.0387  | -3.66374 | -2.23182 |
| C | -0.06853 | 3.881833 | -2.12877 | H | -4.83556 | -3.01448 | -1.86015 |
| H | 1.289466 | 3.117204 | -3.58645 | H | -3.18331 | -3.02036 | -2.46264 |
| C | 0.011393 | 2.854096 | 0.041723 | H | -4.3752  | -4.10802 | -3.17217 |
| H | 1.409554 | 1.258629 | 0.277823 | C | -2.33994 | -5.29374 | 2.319634 |
| C | -0.54804 | 3.803349 | -0.81828 | H | -1.2521  | -5.17042 | 2.318672 |
| H | -0.4805  | 4.623487 | -2.80454 | H | -2.75733 | -4.40771 | 2.803009 |
| H | -0.35738 | 2.769099 | 1.058165 | H | -2.57235 | -6.15695 | 2.949547 |
| N | -1.58211 | 4.661609 | -0.37497 | C | -3.71081 | -8.55496 | -1.21661 |
| C | -2.71294 | 4.892482 | -1.19654 | H | -4.56266 | -8.66368 | -1.89421 |
| C | -3.26555 | 3.855764 | -1.95517 | H | -2.8223  | -8.90602 | -1.75452 |
| C | -3.29521 | 6.161919 | -1.25916 | H | -3.86234 | -9.22471 | -0.36561 |
| C | -4.37195 | 4.089625 | -2.76229 |   |          |          |          |

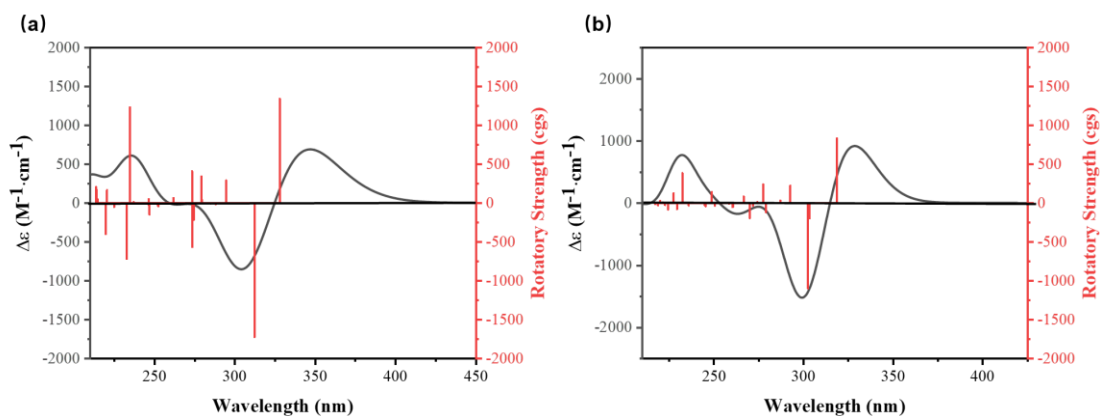

**Figure S46.** The theoretically calculated ECD spectra of (a) (*S*)-*m*-BTT and (b) (*S*)-*m*-BTB (CAM-B3LYP/6-31G\*).

**Table S22.** Summary of the theoretical ECD of (*S*)-*m*-BTT and (*S*)-*m*-BTB about selected transitions and oscillator and rotatory strengths in CH<sub>2</sub>Cl<sub>2</sub> (CAM-B3LYP/6-31G\*).

| Compound                   | Transition               | $\lambda$ , nm (eV) | Oscillator Strength, $f$ | $R$ , ( $10^{-40}$ cgs) | Orbital Contributions                                                                                     |
|----------------------------|--------------------------|---------------------|--------------------------|-------------------------|-----------------------------------------------------------------------------------------------------------|
| <i>(S)</i> - <i>m</i> -BTT | $S_0 \rightarrow S_1$    | 3.78(328)           | 0.3943                   | 1342.86                 | HOMO $\rightarrow$ LUMO (42%)<br>HOMO-1 $\rightarrow$ LUMO+1 (20%)<br>HOMO-2 $\rightarrow$ LUMO (20%)     |
|                            | $S_0 \rightarrow S_2$    | 3.97(312)           | 1.2197                   | -1720.70                | HOMO-1 $\rightarrow$ LUMO (36%)<br>HOMO $\rightarrow$ LUMO+1 (34%)                                        |
|                            | $S_0 \rightarrow S_3$    | 4.21(295)           | 0.5307                   | 292.59                  | HOMO-2 $\rightarrow$ LUMO (54%)<br>HOMO-1 $\rightarrow$ LUMO+1 (18%)                                      |
|                            | $S_0 \rightarrow S_4$    | 4.30(288)           | 0.0240                   | -13.24                  | HOMO-4 $\rightarrow$ LUMO (22%)<br>HOMO $\rightarrow$ LUMO+3 (12%)<br>HOMO-2 $\rightarrow$ LUMO+1 (10%)   |
|                            | $S_0 \rightarrow S_5$    | 4.35(285)           | 0.1006                   | -1.22                   | HOMO-2 $\rightarrow$ LUMO+2 (17%)<br>HOMO-5 $\rightarrow$ LUMO (14%)<br>HOMO-1 $\rightarrow$ LUMO+3 (11%) |
|                            | $S_0 \rightarrow S_6$    | 4.43(279.4)         | 0.0133                   | 44.93                   | HOMO-1 $\rightarrow$ LUMO (40%)<br>HOMO-1 $\rightarrow$ LUMO+5 (40%)                                      |
|                            | $S_0 \rightarrow S_7$    | 4.44(279.2)         | 0.0365                   | 345.02                  | HOMO $\rightarrow$ LUMO (40%)<br>HOMO-1 $\rightarrow$ LUMO+5 (40%)                                        |
|                            | $S_0 \rightarrow S_8$    | 4.52(274)           | 0.1217                   | -213.03                 | HOMO-3 $\rightarrow$ LUMO (36%)<br>HOMO-2 $\rightarrow$ LUMO+1 (17%)                                      |
|                            | $S_0 \rightarrow S_9$    | 4.53(273.5)         | 0.2823                   | -562.20                 | HOMO $\rightarrow$ LUMO+6 (41%)<br>HOMO-1 $\rightarrow$ LUMO+6 (28%)<br>HOMO-1 $\rightarrow$ LUMO+7 (13%) |
|                            | $S_0 \rightarrow S_{10}$ | 4.54(273.3)         | 0.3734                   | 410.60                  | HOMO-1 $\rightarrow$ LUMO+7 (37%)                                                                         |



|                  |                                 |             |        |          |                                                                                  |
|------------------|---------------------------------|-------------|--------|----------|----------------------------------------------------------------------------------|
|                  |                                 |             |        |          | HOMO→LUMO+7 (33%)<br>HOMO-1→LUMO+6 (11%)                                         |
|                  | S <sub>0</sub> →S <sub>11</sub> | 4.55(272)   | 0.0036 | -3.89    | HOMO-2→LUMO+1 (28%)<br>HOMO→LUMO+1 (27%)<br>HOMO-1→LUMO (24%)                    |
|                  | S <sub>0</sub> →S <sub>12</sub> | 4.74(262)   | 0.0493 | 67.19    | HOMO-1→LUMO+1 (31%)<br>HOMO→LUMO+10 (28%)                                        |
|                  | S <sub>0</sub> →S <sub>13</sub> | 4.91(252.3) | 0.0274 | -37.34   | HOMO-1→LUMO+10 (31%)<br>HOMO→LUMO+10 (28%)                                       |
|                  | S <sub>0</sub> →S <sub>14</sub> | 4.92(252.1) | 0.0335 | -32.12   | HOMO→LUMO+11 (35%)<br>HOMO-1→LUMO+11 (23%)                                       |
|                  | S <sub>0</sub> →S <sub>15</sub> | 5.00(248)   | 0.0020 | 3.82     | HOMO-3→LUMO+1 (25%)<br>HOMO→LUMO (13%)<br>HOMO-2→LUMO (11%)                      |
| <b>(S)-m-BTB</b> | S <sub>0</sub> →S <sub>1</sub>  | 3.89(319)   | 0.2830 | 833.59   | HOMO→LUMO+1 (35%)<br>HOMO-1→LUMO (19%)<br>HOMO-1→LUMO+1 (12%)                    |
|                  | S <sub>0</sub> →S <sub>2</sub>  | 4.09(303)   | 0.2739 | -195.61  | HOMO-3→LUMO (56%)                                                                |
|                  | S <sub>0</sub> →S <sub>3</sub>  | 4.10(302)   | 1.0038 | -1093.62 | HOMO-3→LUMO (19%)<br>HOMO-1→LUMO (18%)<br>HOMO→LUMO+1 (14%)<br>HOMO-2→LUMO (10%) |
|                  | S <sub>0</sub> →S <sub>4</sub>  | 4.24(293)   | 0.2850 | 225.90   | HOMO→LUMO (27%)<br>HOMO-4→LUMO (21%)<br>HOMO-1→LUMO+1 (15%)<br>HOMO-2→LUMO (13%) |
|                  | S <sub>0</sub> →S <sub>5</sub>  | 4.32(287)   | 0.0814 | 34.62    | HOMO→LUMO (56%)<br>HOMO-1→LUMO+1 (14%)                                           |
|                  | S <sub>0</sub> →S <sub>6</sub>  | 4.37(284)   | 0.0022 | -0.54    | HOMO-4→LUMO (15%)<br>HOMO-6→LUMO+1 (10%)                                         |
|                  | S <sub>0</sub> →S <sub>7</sub>  | 4.44(279)   | 0.0773 | -114.06  | HOMO→LUMO+5 (16%)<br>HOMO→LUMO+3 (16%)                                           |
|                  | S <sub>0</sub> →S <sub>8</sub>  | 4.47(277)   | 0.0431 | 242.32   | HOMO→LUMO+5 (66%)                                                                |
|                  | S <sub>0</sub> →S <sub>9</sub>  | 4.52(274)   | 0.0774 | 14.75    | HOMO-5→LUMO (23%)<br>HOMO-1→LUMO+1 (11%)                                         |
|                  | S <sub>0</sub> →S <sub>10</sub> | 4.56(272)   | 0.3809 | -30.30   | HOMO→LUMO+6 (88%)                                                                |
|                  | S <sub>0</sub> →S <sub>11</sub> | 4.59(270)   | 0.0446 | -188.88  | HOMO-5→LUMO (37%)<br>HOMO-1→LUMO+2 (10%)                                         |
|                  | S <sub>0</sub> →S <sub>12</sub> | 4.65(267)   | 0.0308 | 87.93    | HOMO-7→LUMO (67%)                                                                |
|                  | S <sub>0</sub> →S <sub>13</sub> | 4.75(261)   | 0.3260 | -43.74   | HOMO-8→LUMO (23%)<br>HOMO-1→LUMO+2 (22%)<br>HOMO-2→LUMO (11%)                    |

|  |                          |           |        |        |                                                                 |
|--|--------------------------|-----------|--------|--------|-----------------------------------------------------------------|
|  |                          |           |        |        | HOMO62→LUMO (10%)                                               |
|  | $S_0 \rightarrow S_{14}$ | 4.76(260) | 0.0696 | -46.06 | HOMO-2→LUMO+1 (22%)<br>HOMO-1→LUMO+1 (17%)<br>HOMO-2→LUMO (12%) |
|  | $S_0 \rightarrow S_{15}$ | 4.80(258) | 0.0162 | -7.06  | HOMO-11→LUMO (67%)                                              |

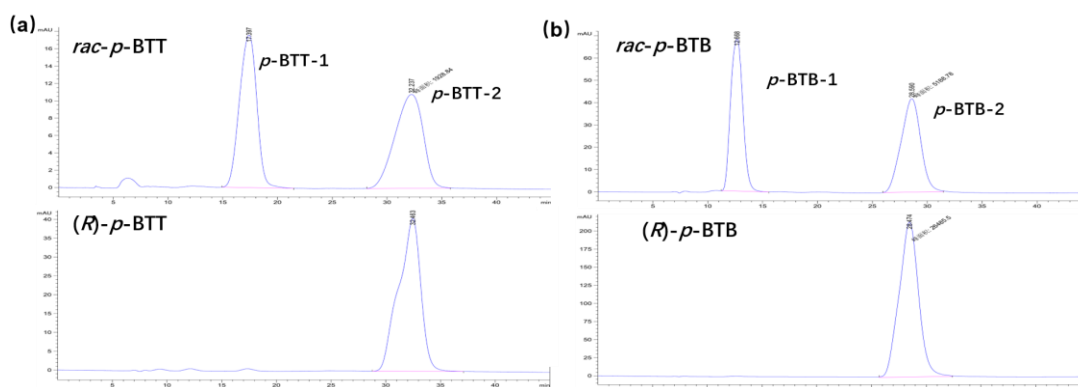

**Figure S47.** HPLC chromatogram of (a) *rac-p-BTT* and (*R*)-*p-BTT* and (b) *rac-p-BTB* and (*R*)-*p-BTB* by analytical HPLC equipped with a Daicel Chiralpak IF column with *n*-hexane/isopropanol = 90:10, flow = 0.8 mL/min. (The compounds of (*R*)-*p-BTT* and (*R*)-*p-BTB* were synthesized as described for *rac-p-BTT* and *rac-p-BTB*, respectively, using (*R*)-1-(2-hydroxynaphthalen-1-yl)naphthalen-2-ol ((*R*)-BINOL) as starting material).

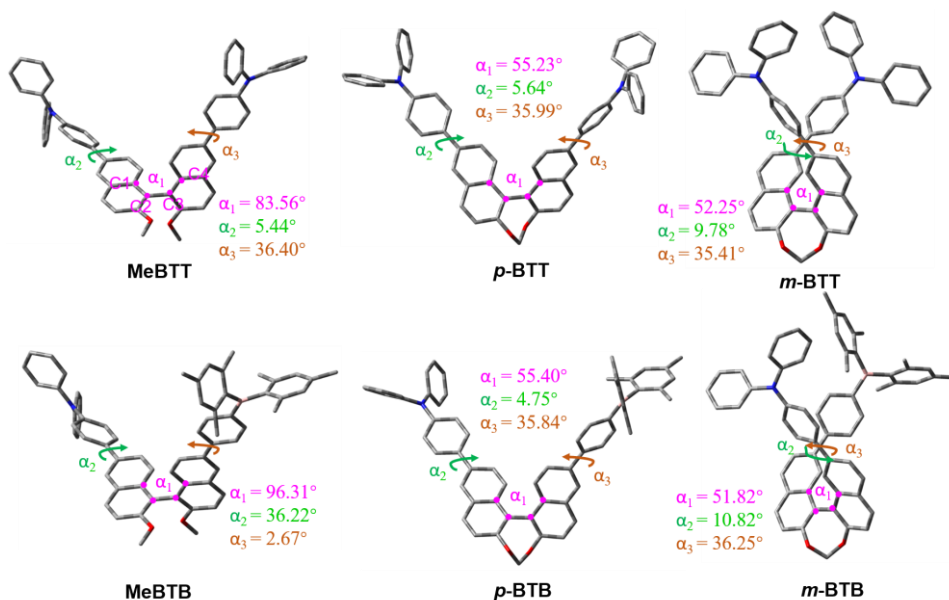

**Figure S48.** The optimized structures (CAM-B3LYP/6-31G\*) in the  $S_1$  excited state. Hydrogen atoms are omitted. The angles between the adjacent aryl rings are shown for comparison.

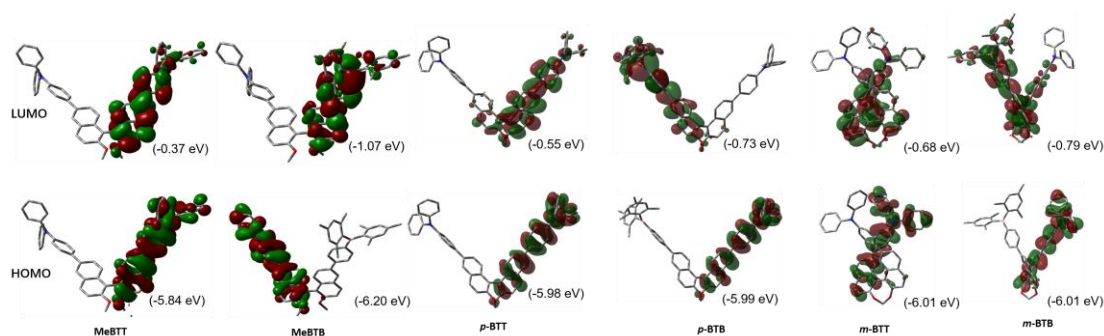

**Figure S49.** Molecular orbitals contributing to the DFT calculated transitions in the  $S_1$  excited state of *p*-BTT, *m*-BTT, *p*-BTB and *m*-BTB in  $\text{CH}_2\text{Cl}_2$  (iso = 0.02, CAM-B3LYP/6-31G\*).

**Table S23.** Coordinates ( $\text{\AA}$ ) for the optimized structure (CAM-B3LYP/6-31G\*) of MeBTT in the  $S_1$  excited state.

| Atom | X        | Y        | Z        | Atom | X        | Y        | Z        |
|------|----------|----------|----------|------|----------|----------|----------|
| C    | -0.57283 | 3.967221 | -0.7608  | C    | 8.809005 | -2.01438 | -2.23231 |
| C    | -0.54437 | 4.812936 | -1.85593 | H    | -3.38601 | 3.857539 | -3.458   |
| O    | 0.508412 | 5.669833 | -1.93238 | H    | -1.53335 | 5.435045 | -3.68816 |
| O    | -0.63859 | 5.818214 | 1.238774 | H    | 1.397355 | 5.846293 | 3.026488 |
| C    | 0.447326 | 5.006335 | 1.270653 | H    | 3.300099 | 4.310202 | 2.972262 |
| C    | 0.518277 | 4.034889 | 0.25458  | H    | -0.98204 | 2.172934 | 1.242319 |
| C    | -1.65218 | 3.051441 | -0.61961 | H    | -2.84313 | 0.609841 | 1.440488 |
| C    | -2.67921 | 3.004248 | -1.60306 | H    | -4.53209 | 2.093526 | -2.21282 |
| C    | -2.60405 | 3.887092 | -2.70462 | H    | 4.467001 | 2.445899 | 1.951586 |
| C    | -1.5665  | 4.770531 | -2.83418 | H    | 2.852897 | 0.555987 | -1.60749 |
| C    | 1.455774 | 5.097865 | 2.245754 | H    | 0.990422 | 2.067965 | -1.56568 |
| C    | 2.525028 | 4.234902 | 2.214863 | H    | -5.11747 | -0.15991 | -2.34139 |
| C    | 2.645961 | 3.232614 | 1.207749 | H    | -7.0098  | -1.70191 | -2.10806 |
| C    | 1.605328 | 3.155283 | 0.216877 | H    | -6.95139 | -1.12973 | 2.139671 |
| C    | -1.75734 | 2.161011 | 0.484402 | H    | -5.1007  | 0.458273 | 1.901604 |
| C    | -2.8053  | 1.290808 | 0.595961 | H    | 4.233483 | -0.84521 | -1.47943 |
| C    | -3.8358  | 1.23384  | -0.38409 | H    | 6.102513 | -2.36016 | -1.49543 |
| C    | -3.75149 | 2.089563 | -1.45703 | H    | 7.927173 | -0.18416 | 1.755764 |
| C    | 3.722369 | 2.350286 | 1.170276 | H    | 6.078066 | 1.360618 | 1.777054 |
| C    | 3.855085 | 1.331131 | 0.172021 | H    | -9.3679  | -4.18422 | 1.802745 |
| C    | 2.804801 | 1.286802 | -0.80863 | H    | -9.35956 | -0.07201 | 0.591568 |
| C    | 1.749796 | 2.14112  | -0.79515 | H    | -11.1646 | 0.408217 | 2.202897 |
| C    | -4.96101 | 0.279651 | -0.24031 | H    | -12.1045 | -1.41184 | 3.609942 |
| C    | -5.52427 | -0.35276 | -1.35368 | H    | -11.1968 | -3.71479 | 3.390393 |

|   |          |          |          |   |          |          |          |
|---|----------|----------|----------|---|----------|----------|----------|
| C | -6.58921 | -1.23128 | -1.22612 | H | 10.86007 | -2.51554 | 0.542966 |
| C | -7.11853 | -1.52843 | 0.032939 | H | 11.95075 | -3.15479 | 2.663979 |
| C | -6.55508 | -0.91236 | 1.153831 | H | 10.58041 | -3.64239 | 4.677249 |
| C | -5.50285 | -0.0201  | 1.01401  | H | 8.104131 | -3.49915 | 4.539274 |
| C | 5.040718 | -0.66695 | -0.7797  | H | 7.012474 | -2.8788  | 2.410982 |
| C | 6.094467 | -1.53302 | -0.79459 | H | 9.33563  | -1.91076 | -4.30394 |
| C | 7.171174 | -1.39534 | 0.130412 | H | 9.975402 | -4.30642 | -4.45107 |
| C | 7.108473 | -0.32602 | 1.058629 | H | 9.805125 | -5.74685 | -2.43427 |
| C | 6.052529 | 0.542177 | 1.069435 | H | 8.988219 | -4.80894 | -0.30236 |
| C | 4.949591 | 0.42803  | 0.147986 | H | 8.541997 | -0.96588 | -2.16313 |
| N | -8.19801 | -2.43359 | 0.1696   | C | -8.23673 | -3.6155  | -0.61241 |
| N | 8.237581 | -2.28684 | 0.125317 | C | -7.07781 | -4.37045 | -0.81514 |
| C | -9.24139 | -2.1601  | 1.089642 | C | -9.43505 | -4.0436  | -1.19106 |
| C | 8.865568 | -2.65919 | 1.340748 | C | -7.11862 | -5.52321 | -1.58899 |
| C | 8.714312 | -2.82571 | -1.0953  | H | -6.14563 | -4.04856 | -0.36361 |
| C | -9.76868 | -3.17989 | 1.887153 | C | -9.47141 | -5.20794 | -1.94762 |
| C | -9.75883 | -0.86723 | 1.211781 | H | -10.3371 | -3.4596  | -1.04355 |
| C | -10.7754 | -0.60205 | 2.120406 | C | -8.31457 | -5.95252 | -2.15601 |
| C | -11.3052 | -1.62074 | 2.906349 | H | -6.20863 | -6.09671 | -1.73691 |
| C | -10.7983 | -2.91035 | 2.779687 | H | -10.4111 | -5.52638 | -2.38861 |
| C | 10.26091 | -2.74082 | 1.418125 | H | -8.34474 | -6.85768 | -2.75381 |
| C | 10.86802 | -3.09803 | 2.613107 | C | 0.590178 | 6.558174 | -3.03173 |
| C | 10.10049 | -3.36777 | 3.7437   | H | 0.660786 | 6.018435 | -3.98252 |
| C | 8.712477 | -3.28174 | 3.667064 | H | -0.26677 | 7.23999  | -3.06423 |
| C | 8.093458 | -2.9319  | 2.475942 | H | 1.501803 | 7.13622  | -2.88044 |
| C | 9.258864 | -2.5505  | -3.43045 | C | -0.77144 | 6.817399 | 2.232673 |
| C | 9.622971 | -3.89177 | -3.5124  | H | -1.7027  | 7.338601 | 2.011406 |
| C | 9.530805 | -4.6981  | -2.37963 | H | -0.83057 | 6.3791   | 3.23515  |
| C | 9.075517 | -4.17611 | -1.17846 | H | 0.060473 | 7.52951  | 2.197206 |

**Table S24.** Coordinates (Å) for the optimized structure (CAM-B3LYP/6-31G\*) of MeBTB in the S<sub>1</sub> excited state.

| Atom | X        | Y        | Z        | Atom | X        | Y        | Z        |
|------|----------|----------|----------|------|----------|----------|----------|
| C    | 1.818002 | 3.694632 | 0.958232 | H    | -0.01567 | 2.040582 | 1.725612 |
| C    | 1.70859  | 4.405212 | 2.140203 | H    | 6.362413 | -0.51922 | 2.302023 |
| O    | 0.63824  | 5.234422 | 2.250507 | H    | 8.296181 | -1.99276 | 1.993114 |
| O    | 2.210326 | 5.437079 | -1.09235 | H    | 8.421601 | -0.95549 | -2.16469 |

|   |          |          |          |   |          |          |          |
|---|----------|----------|----------|---|----------|----------|----------|
| C | 1.035292 | 4.793617 | -1.1503  | H | 6.528186 | 0.564003 | -1.84389 |
| C | 0.788448 | 3.874618 | -0.10447 | H | -3.81276 | -0.09134 | 1.788548 |
| C | 2.917281 | 2.812254 | 0.769188 | H | -5.88116 | -1.31098 | 1.748167 |
| C | 3.889834 | 2.665776 | 1.795954 | H | -6.95004 | 0.547435 | -1.9841  |
| C | 3.736615 | 3.412868 | 2.987269 | H | -4.89516 | 1.789818 | -1.97719 |
| C | 2.676479 | 4.260008 | 3.163305 | H | 10.8587  | -4.00244 | -2.05334 |
| C | 0.08744  | 4.99997  | -2.17521 | H | 10.73985 | -0.03738 | -0.42866 |
| C | -1.09076 | 4.304591 | -2.16217 | H | 12.58892 | 0.631031 | -1.91911 |
| C | -1.38827 | 3.363233 | -1.12874 | H | 13.60545 | -1.0216  | -3.47175 |
| C | -0.41165 | 3.165578 | -0.09239 | H | 12.73106 | -3.34711 | -3.52077 |
| C | 3.092337 | 2.051599 | -0.4185  | H | -11.8524 | -0.74923 | -2.80843 |
| C | 4.160894 | 1.212818 | -0.57035 | H | -8.45085 | -2.46159 | -4.73802 |
| C | 5.142435 | 1.061935 | 0.448641 | H | -9.32402 | -1.26924 | 4.418599 |
| C | 4.985898 | 1.788923 | 1.605562 | H | -9.36742 | -5.04487 | 2.426293 |
| C | -2.57836 | 2.654606 | -1.11569 | C | 9.650502 | -3.69665 | 0.376055 |
| C | -2.90417 | 1.704428 | -0.09137 | C | 8.509328 | -4.49985 | 0.456039 |
| C | -1.90896 | 1.529351 | 0.933475 | C | 10.83828 | -4.14452 | 0.961024 |
| C | -0.73769 | 2.212138 | 0.935525 | C | 8.556519 | -5.72031 | 1.117623 |
| C | 6.293105 | 0.147616 | 0.256501 | H | 7.585977 | -4.16217 | -0.00212 |
| C | 6.818125 | -0.59437 | 1.319696 | C | 10.88214 | -5.37485 | 1.604314 |
| C | 7.906903 | -1.43527 | 1.148331 | H | 11.72612 | -3.52374 | 0.907756 |
| C | 8.501188 | -1.58228 | -0.10861 | C | 9.742389 | -6.16823 | 1.691456 |
| C | 7.975986 | -0.85554 | -1.18111 | H | 7.66045  | -6.33104 | 1.171403 |
| C | 6.898909 | -0.00249 | -0.99532 | H | 11.8134  | -5.70794 | 2.052243 |
| C | -4.48434 | 0.062353 | 0.952531 | H | 9.777938 | -7.12563 | 2.201057 |
| C | -5.66298 | -0.62793 | 0.93226  | B | -7.94096 | -1.29554 | -0.14347 |
| C | -6.62166 | -0.50633 | -0.12324 | C | -8.449   | 0.248238 | 2.445177 |
| C | -6.25871 | 0.405158 | -1.15836 | H | -7.39702 | 0.481045 | 2.643136 |
| C | -5.0902  | 1.115857 | -1.15224 | H | -8.71086 | 0.754958 | 1.514015 |
| C | -4.12553 | 0.980047 | -0.09338 | H | -9.03995 | 0.691372 | 3.252352 |
| N | 9.605951 | -2.44617 | -0.29145 | C | -8.51502 | -4.27494 | 0.041712 |
| C | 10.6741  | -2.06411 | -1.14261 | H | -9.11467 | -3.9624  | -0.81659 |
| C | -8.76299 | -1.4101  | -1.49946 | H | -7.46877 | -4.26577 | -0.28195 |
| C | -8.46152 | -1.9885  | 1.18898  | H | -8.77553 | -5.30992 | 0.280044 |
| C | 11.24481 | -2.98935 | -2.0211  | C | -9.862   | -3.90508 | 4.845902 |
| C | 11.17296 | -0.75872 | -1.11321 | H | -10.5929 | -4.6922  | 4.636621 |
| C | 12.21432 | -0.38745 | -1.95412 | H | -9.02696 | -4.37516 | 5.379142 |
| C | 12.78696 | -1.31268 | -2.82142 | H | -10.3218 | -3.18572 | 5.529336 |
| C | 12.2986  | -2.61537 | -2.84522 | C | -10.8347 | -0.39804 | -0.39042 |
| C | -10.1155 | -0.99286 | -1.5787  | H | -10.8566 | -1.08495 | 0.459011 |

|   |          |          |          |   |          |          |          |
|---|----------|----------|----------|---|----------|----------|----------|
| C | -10.8186 | -1.08737 | -2.77668 | H | -10.3471 | 0.519618 | -0.04432 |
| C | -10.2407 | -1.60543 | -3.93323 | H | -11.8662 | -0.14363 | -0.6492  |
| C | -8.92083 | -2.03295 | -3.85506 | C | -6.75339 | -2.439   | -2.72041 |
| C | -8.1798  | -1.93744 | -2.67623 | H | -6.04894 | -1.62548 | -2.92557 |
| C | -9.14536 | -1.87137 | 3.529974 | H | -6.44183 | -2.89107 | -1.77672 |
| C | -9.39312 | -3.23794 | 3.579481 | H | -6.63176 | -3.18407 | -3.51248 |
| C | -9.1781  | -3.97338 | 2.416467 | C | -11.0165 | -1.68438 | -5.22186 |
| C | -8.73231 | -3.37901 | 1.238868 | H | -11.0314 | -0.71582 | -5.73593 |
| C | -8.68079 | -1.24449 | 2.373001 | H | -10.5758 | -2.41196 | -5.90916 |
| H | 4.477708 | 3.305708 | 3.774005 | H | -12.0581 | -1.96965 | -5.04501 |
| H | 2.584072 | 4.818776 | 4.08575  | C | 0.466682 | 5.978645 | 3.444539 |
| H | 0.285937 | 5.706779 | -2.97046 | H | -0.44691 | 6.556286 | 3.305673 |
| H | -1.82139 | 4.463491 | -2.94939 | H | 0.34949  | 5.32247  | 4.313542 |
| H | 2.354877 | 2.131268 | -1.20987 | H | 1.304035 | 6.663723 | 3.61494  |
| H | 4.25241  | 0.628837 | -1.48067 | C | 2.548317 | 6.370527 | -2.11071 |
| H | 5.725628 | 1.717261 | 2.397938 | H | 2.589061 | 5.884911 | -3.09044 |
| H | -3.27974 | 2.844421 | -1.91827 | H | 1.833917 | 7.198882 | -2.137   |
| H | -2.08742 | 0.822115 | 1.732958 | H | 3.535541 | 6.747614 | -1.84837 |

**Table S25.** Coordinates (Å) for the optimized structure (CAM-B3LYP/6-31G\*) of *p*-**BTT** in the S<sub>1</sub> excited state.

| Atom | X        | Y        | Z        | Atom | X        | Y        | Z        |
|------|----------|----------|----------|------|----------|----------|----------|
| C    | 0.033614 | 7.713095 | 0.417987 | C    | 10.02149 | -2.68391 | -3.57533 |
| C    | -0.6501  | 4.790617 | -0.08943 | C    | 9.436973 | -3.84997 | -3.09087 |
| C    | -0.95255 | 5.958327 | -0.79735 | C    | 8.578991 | -3.80859 | -1.99923 |
| O    | -0.0454  | 6.999154 | -0.79307 | C    | 8.903303 | -1.42612 | -1.84397 |
| O    | 0.099565 | 6.873648 | 1.548284 | H    | -0.85508 | 8.33144  | 0.576311 |
| C    | 0.981003 | 5.817397 | 1.435501 | H    | 0.932014 | 8.331279 | 0.327294 |
| C    | 0.652407 | 4.747306 | 0.629166 | H    | -3.94758 | 5.153467 | -2.16081 |
| C    | -1.61031 | 3.75892  | -0.04834 | H    | -2.29445 | 7.010714 | -2.09653 |
| C    | -2.82375 | 3.873306 | -0.81425 | H    | 2.34334  | 6.722346 | 2.830311 |
| C    | -3.03658 | 5.063838 | -1.57639 | H    | 3.965526 | 4.836717 | 2.711241 |
| C    | -2.12838 | 6.090074 | -1.54646 | H    | -0.61096 | 2.494672 | 1.415347 |
| C    | 2.166215 | 5.861384 | 2.194846 | H    | -2.2518  | 0.756951 | 1.437666 |
| C    | 3.052553 | 4.823504 | 2.123481 | H    | -4.65045 | 2.982726 | -1.40933 |
| C    | 2.809229 | 3.727947 | 1.256749 | H    | 4.663468 | 2.739974 | 1.720155 |
| C    | 1.613433 | 3.695909 | 0.484293 | H    | 2.233841 | 0.829026 | -1.25208 |
| C    | -1.47697 | 2.585019 | 0.770765 | H    | 0.571886 | 2.594199 | -1.06066 |
| C    | -2.41265 | 1.601328 | 0.777822 | H    | -6.04839 | 1.627975 | -1.27223 |

|   |          |          |          |   |          |          |          |
|---|----------|----------|----------|---|----------|----------|----------|
| C | -3.60513 | 1.657062 | -0.02388 | H | -7.67094 | -0.15285 | -1.2831  |
| C | -3.76697 | 2.84758  | -0.79674 | H | -5.07464 | -2.56316 | 1.190292 |
| C | 3.756144 | 2.682358 | 1.125603 | H | -3.42927 | -0.80699 | 1.1969   |
| C | 3.573105 | 1.638576 | 0.248859 | H | 4.341175 | 0.312178 | -2.00645 |
| C | 2.396944 | 1.639561 | -0.54901 | H | 5.978819 | -1.49717 | -2.20892 |
| C | 1.45609  | 2.625412 | -0.43588 | H | 6.74531  | -1.27769 | 2.003626 |
| C | -4.56228 | 0.608637 | -0.02678 | H | 5.062909 | 0.492192 | 2.216743 |
| C | -5.80898 | 0.714106 | -0.74451 | H | -7.81717 | -5.16176 | -0.02417 |
| C | -6.73518 | -0.28883 | -0.75234 | H | -7.49429 | -1.6802  | 2.469747 |
| C | -6.51284 | -1.49935 | -0.04336 | H | -7.77893 | -3.09308 | 4.477462 |
| C | -5.28503 | -1.63402 | 0.673136 | H | -8.09971 | -5.54451 | 4.243188 |
| C | -4.36073 | -0.63263 | 0.672948 | H | -8.12612 | -6.56884 | 1.980708 |
| C | 4.85317  | -0.0374  | -1.11541 | H | 9.692322 | -3.53251 | 0.795744 |
| C | 5.784888 | -1.05688 | -1.23708 | H | 9.87261  | -5.28215 | 2.526471 |
| C | 6.485415 | -1.51777 | -0.11836 | H | 7.823194 | -6.28573 | 3.510184 |
| C | 6.215527 | -0.93283 | 1.122526 | H | 5.593023 | -5.52405 | 2.721931 |
| C | 5.26886  | 0.073384 | 1.236721 | H | 5.417385 | -3.79924 | 0.966469 |
| C | 4.571193 | 0.550131 | 0.122176 | H | 10.19881 | -0.5556  | -3.31011 |
| N | -7.44891 | -2.52187 | -0.05242 | H | 10.68554 | -2.71838 | -4.4329  |
| N | 7.442281 | -2.55192 | -0.23855 | H | 9.638103 | -4.8015  | -3.57355 |
| C | -7.63708 | -3.33049 | 1.0956   | H | 8.115175 | -4.7184  | -1.63371 |
| C | 7.543086 | -3.54899 | 0.765135 | H | 8.702816 | -0.48169 | -1.34965 |
| C | 8.307419 | -2.59485 | -1.36159 | C | -8.23362 | -2.76496 | -1.2079  |
| C | -7.82027 | -4.71271 | 0.962614 | C | -7.64601 | -2.71546 | -2.47752 |
| C | -7.61978 | -2.75245 | 2.37092  | C | -9.60145 | -3.03773 | -1.08574 |
| C | -7.78482 | -3.55076 | 3.49342  | C | -8.42052 | -2.9392  | -3.60614 |
| C | -7.97061 | -4.92436 | 3.362377 | H | -6.58385 | -2.51735 | -2.56692 |
| C | -7.98948 | -5.498   | 2.092209 | C | -10.3637 | -3.26386 | -2.22181 |
| C | 8.795603 | -3.97604 | 1.214876 | H | -10.0584 | -3.05963 | -0.10279 |
| C | 8.891674 | -4.96119 | 2.189416 | C | -9.78059 | -3.21424 | -3.48617 |
| C | 7.744996 | -5.5216  | 2.743651 | H | -7.95507 | -2.90849 | -4.58604 |
| C | 6.496874 | -5.09147 | 2.303892 | H | -11.4244 | -3.46955 | -2.11926 |
| C | 6.392637 | -4.12054 | 1.316037 | H | -10.3825 | -3.38843 | -4.37186 |
| C | 9.745155 | -1.47308 | -2.94783 |   |          |          |          |

**Table S. 26.** Coordinates (Å) for the optimized structure (CAM-B3LYP/6-31G\*) of *p*-BTB in the S<sub>1</sub> excited state.

| Atom | X        | Y       | Z        | Atom | X        | Y        | Z        |
|------|----------|---------|----------|------|----------|----------|----------|
| C    | 1.753388 | 7.95251 | -0.47861 | H    | 3.277283 | 0.788101 | -1.45157 |

|   |          |          |          |   |          |          |          |
|---|----------|----------|----------|---|----------|----------|----------|
| C | 2.101639 | 4.975461 | 0.048337 | H | 5.864829 | 2.749315 | 1.424618 |
| C | 2.52009  | 6.105859 | 0.757433 | H | -3.38414 | 3.519579 | -1.82128 |
| O | 1.733253 | 7.240287 | 0.735451 | H | -1.21946 | 1.366681 | 1.191055 |
| O | 1.607789 | 7.119983 | -1.60722 | H | 0.634074 | 2.931464 | 1.008434 |
| C | 0.613865 | 6.1688   | -1.5021  | H | 7.093302 | 1.239641 | 1.336988 |
| C | 0.812112 | 5.072593 | -0.68811 | H | 8.519364 | -0.70152 | 1.364255 |
| C | 2.943813 | 3.844818 | 0.023162 | H | 5.74836  | -2.80057 | -1.20151 |
| C | 4.151633 | 3.829048 | 0.806091 | H | 4.296971 | -0.88153 | -1.22605 |
| C | 4.481891 | 4.991796 | 1.569469 | H | -3.3747  | 1.114138 | 1.925443 |
| C | 3.691922 | 6.111019 | 1.524006 | H | -5.24355 | -0.4577  | 2.125243 |
| C | -0.54976 | 6.340876 | -2.27665 | H | -5.87518 | -0.2546  | -2.10925 |
| C | -1.54731 | 5.40911  | -2.21227 | H | -4.02198 | 1.338927 | -2.31096 |
| C | -1.43734 | 4.297937 | -1.33835 | H | 8.169897 | -5.68532 | 0.038637 |
| C | -0.26155 | 4.135426 | -0.55165 | H | 8.283438 | -2.15842 | -2.40957 |
| C | 2.6953   | 2.690095 | -0.79617 | H | 8.470686 | -3.56851 | -4.43069 |
| C | 3.520523 | 1.611943 | -0.79107 | H | 8.524187 | -6.04285 | -4.22549 |
| C | 4.701324 | 1.540393 | 0.026545 | H | 8.381956 | -7.09213 | -1.97884 |
| C | 4.978829 | 2.707502 | 0.802358 | H | -10.0133 | -2.9631  | -3.13112 |
| C | -2.4961  | 3.365091 | -1.2154  | H | -6.0598  | -4.55764 | -3.37852 |
| C | -2.44054 | 2.314035 | -0.33022 | H | -9.33866 | 0.199046 | 3.855441 |
| C | -1.28181 | 2.185916 | 0.482184 | H | -8.39475 | -3.96477 | 3.936606 |
| C | -0.23446 | 3.058305 | 0.373991 | C | 8.804399 | -3.35972 | 1.269105 |
| C | 5.541222 | 0.39583  | 0.041453 | C | 8.191193 | -3.2606  | 2.52368  |
| C | 6.773729 | 0.362347 | 0.790087 | C | 10.13782 | -3.77707 | 1.178814 |
| C | 7.588789 | -0.73269 | 0.808475 | C | 8.906161 | -3.57835 | 3.66889  |
| C | 7.258672 | -1.906   | 0.079177 | H | 7.154408 | -2.9502  | 2.588213 |
| C | 6.041721 | -1.90385 | -0.66776 | C | 10.84007 | -4.09608 | 2.331142 |
| C | 5.227471 | -0.81114 | -0.67683 | H | 10.61646 | -3.83779 | 0.207918 |
| C | -3.91583 | 0.812079 | 1.034197 | C | 10.2315  | -3.99727 | 3.58052  |
| C | -4.97686 | -0.07405 | 1.144633 | H | 8.420171 | -3.50802 | 4.636705 |
| C | -5.71606 | -0.48829 | 0.025192 | H | 11.87483 | -4.41391 | 2.253321 |
| C | -5.33754 | 0.049284 | -1.21563 | H | 10.78691 | -4.24473 | 4.479073 |
| C | -4.29373 | 0.954206 | -1.33288 | B | -6.90174 | -1.50044 | 0.153697 |
| C | -3.56003 | 1.350204 | -0.20817 | C | -8.19723 | 0.855603 | 1.566765 |
| N | 8.081789 | -3.02133 | 0.097323 | H | -7.28928 | 1.399513 | 1.847446 |
| C | 8.214406 | -3.83143 | -1.05745 | H | -8.22991 | 0.838894 | 0.475493 |
| C | -7.32981 | -2.33971 | -1.11731 | H | -9.05198 | 1.441329 | 1.916683 |
| C | -7.63114 | -1.64829 | 1.549789 | C | -7.09576 | -4.14836 | 1.632355 |
| C | 8.246927 | -5.22683 | -0.94078 | H | -7.45735 | -4.35296 | 0.621867 |
| C | 8.292219 | -3.23907 | -2.3239  | H | -6.00444 | -4.06995 | 1.574547 |



|   |          |          |          |   |          |          |          |
|---|----------|----------|----------|---|----------|----------|----------|
| C | 8.401924 | -4.03638 | -3.45385 | H | -7.32474 | -5.0158  | 2.256805 |
| C | 8.437921 | -5.42344 | -3.33894 | C | -9.6104  | -2.02476 | 5.40363  |
| C | 8.362288 | -6.01154 | -2.07753 | H | -10.1161 | -2.98948 | 5.505457 |
| C | -8.64852 | -2.28778 | -1.62491 | H | -8.88008 | -1.95484 | 6.21834  |
| C | -8.99463 | -3.02491 | -2.75501 | H | -10.3487 | -1.23319 | 5.558453 |
| C | -8.08002 | -3.8455  | -3.40872 | C | -9.71329 | -1.41848 | -0.99717 |
| C | -6.78871 | -3.90865 | -2.89792 | H | -9.84361 | -1.63716 | 0.065299 |
| C | -6.39763 | -3.16483 | -1.78499 | H | -9.46624 | -0.35422 | -1.07907 |
| C | -8.8702  | -0.67283 | 3.403976 | H | -10.6754 | -1.56612 | -1.49457 |
| C | -8.93834 | -1.89519 | 4.061978 | C | -4.96034 | -3.30382 | -1.33064 |
| C | -8.34993 | -2.99558 | 3.444876 | H | -4.32809 | -2.52505 | -1.76954 |
| C | -7.71407 | -2.89627 | 2.209792 | H | -4.84765 | -3.22771 | -0.2472  |
| C | -8.21905 | -0.52875 | 2.178965 | H | -4.55353 | -4.2705  | -1.64066 |
| H | 2.708957 | 8.464466 | -0.62646 | C | -8.47337 | -4.62384 | -4.63671 |
| H | 0.930009 | 8.669332 | -0.40358 | H | -8.36127 | -4.0149  | -5.54154 |
| H | 5.388605 | 4.983601 | 2.167171 | H | -7.84903 | -5.51269 | -4.76308 |
| H | 3.949586 | 7.010116 | 2.074441 | H | -9.51852 | -4.94315 | -4.58943 |
| H | -0.62189 | 7.213122 | -2.91722 | H | 1.832705 | 2.69159  | -1.45162 |
| H | -2.44622 | 5.52094  | -2.81104 |   |          |          |          |

**Table S. 27.** Coordinates (Å) for the optimized structure (CAM-B3LYP/6-31G\*) of *m*-BTT in the S<sub>1</sub> excited state.

| Atom | X        | Y        | Z        | Atom | X        | Y        | Z        |
|------|----------|----------|----------|------|----------|----------|----------|
| C    | -7.92599 | -0.74689 | 0.043748 | H    | -0.44792 | -1.27998 | 0.31268  |
| C    | -4.95927 | -0.64293 | 0.735928 | C    | 1.897395 | -3.45702 | -0.81984 |
| C    | -6.02448 | -1.36246 | 1.278493 | H    | 1.913926 | -4.30516 | -2.79678 |
| O    | -7.04816 | -1.7675  | 0.439451 | H    | 1.584182 | -2.43634 | 1.048045 |
| O    | -7.25381 | 0.412444 | -0.39066 | N    | 3.070413 | -4.12209 | -0.39603 |
| C    | -6.17882 | 0.190681 | -1.2265  | N    | 2.22917  | 4.626247 | 0.376605 |
| C    | -5.00138 | -0.32437 | -0.70188 | C    | 4.162413 | -4.27766 | -1.28771 |
| C    | -3.91488 | -0.19736 | 1.639917 | C    | 4.569814 | -3.21759 | -2.10256 |
| C    | -3.96137 | -0.6482  | 3.009769 | C    | 4.848711 | -5.49299 | -1.36077 |
| C    | -5.01835 | -1.42993 | 3.458564 | C    | 5.635648 | -3.37701 | -2.97889 |
| C    | -6.06794 | -1.77333 | 2.605461 | H    | 4.046163 | -2.26941 | -2.04552 |
| C    | -6.30874 | 0.585389 | -2.56817 | C    | 5.92551  | -5.6386  | -2.22611 |
| C    | -5.24922 | 0.445197 | -3.42494 | H    | 4.533932 | -6.32142 | -0.73538 |
| C    | -4.04128 | -0.13917 | -2.97562 | C    | 6.323029 | -4.58514 | -3.04364 |
| C    | -3.91248 | -0.54906 | -1.61785 | H    | 5.938279 | -2.54367 | -3.60564 |
| C    | -2.90762 | 0.680623 | 1.259636 | H    | 6.448218 | -6.58923 | -2.26964 |

|   |          |          |          |   |          |          |          |
|---|----------|----------|----------|---|----------|----------|----------|
| C | -1.86574 | 1.113781 | 2.141998 | H | 7.159974 | -4.70434 | -3.72401 |
| C | -1.91492 | 0.603883 | 3.481828 | C | 3.160581 | -4.63856 | 0.921813 |
| C | -2.90414 | -0.23067 | 3.889098 | C | 2.07754  | -5.30866 | 1.497746 |
| C | -2.95516 | -0.35427 | -3.863   | C | 4.336685 | -4.48704 | 1.661659 |
| C | -1.80918 | -0.97031 | -3.44668 | C | 2.169391 | -5.80629 | 2.791286 |
| C | -1.68071 | -1.43072 | -2.10873 | H | 1.164105 | -5.43629 | 0.926983 |
| C | -2.72636 | -1.22073 | -1.23472 | C | 4.427065 | -5.00415 | 2.947685 |
| H | -8.55856 | -0.41428 | 0.872702 | H | 5.178935 | -3.96311 | 1.222783 |
| H | -8.52962 | -1.18179 | -0.75903 | C | 3.344285 | -5.66211 | 3.522758 |
| H | -5.03435 | -1.75468 | 4.494995 | H | 1.318089 | -6.32297 | 3.223851 |
| H | -6.90789 | -2.36795 | 2.946414 | H | 5.348581 | -4.87864 | 3.507984 |
| H | -7.25181 | 1.012987 | -2.89127 | H | 3.415278 | -6.05858 | 4.530407 |
| H | -5.33141 | 0.758336 | -4.4614  | C | 2.015933 | 5.471437 | -0.74374 |
| H | -2.93899 | 1.076955 | 0.254939 | C | 0.801249 | 6.149719 | -0.8907  |
| H | -2.91639 | -0.60091 | 4.910538 | C | 3.017953 | 5.625206 | -1.70778 |
| H | -3.05248 | -0.017   | -4.89117 | C | 0.595755 | 6.968492 | -1.99171 |
| H | -2.65391 | -1.6022  | -0.22428 | H | 0.032243 | 6.040014 | -0.1342  |
| H | -1.13615 | 0.867031 | 4.187975 | C | 2.803232 | 6.451853 | -2.80086 |
| H | -0.98393 | -1.10322 | -4.13867 | H | 3.954119 | 5.089212 | -1.59847 |
| C | -0.83427 | 1.989676 | 1.702353 | C | 1.593136 | 7.124886 | -2.95078 |
| C | 0.096324 | 2.601451 | 2.606948 | H | -0.34678 | 7.496614 | -2.09412 |
| C | -0.65684 | 2.324037 | 0.315852 | H | 3.58381  | 6.562307 | -3.54672 |
| C | 1.083499 | 3.443894 | 2.184661 | H | 1.428779 | 7.767452 | -3.80942 |
| H | -0.00389 | 2.433156 | 3.672082 | C | 3.478244 | 4.675728 | 1.047944 |
| C | 0.330625 | 3.167869 | -0.11158 | C | 4.10285  | 3.492529 | 1.457011 |
| H | -1.2841  | 1.857331 | -0.43269 | C | 4.086426 | 5.908194 | 1.310627 |
| C | 1.234604 | 3.760355 | 0.804799 | C | 5.318653 | 3.547547 | 2.123686 |
| H | 1.740376 | 3.91052  | 2.909521 | H | 3.637649 | 2.538235 | 1.236582 |
| H | 0.44665  | 3.365159 | -1.17122 | C | 5.305104 | 5.949821 | 1.971224 |
| C | -0.44923 | -2.12551 | -1.66783 | H | 3.595259 | 6.824728 | 1.00345  |
| C | 0.256142 | -2.97323 | -2.52874 | C | 5.926155 | 4.772876 | 2.383559 |
| C | 0.053108 | -1.95736 | -0.37226 | H | 5.799516 | 2.62451  | 2.43126  |
| C | 1.401257 | -3.63581 | -2.1148  | H | 5.76803  | 6.910026 | 2.17498  |
| H | -0.11572 | -3.14993 | -3.5332  | H | 6.877773 | 4.811185 | 2.903275 |
| C | 1.206466 | -2.60221 | 0.045137 |   |          |          |          |

**Table S. 28.** Coordinates (Å) for the optimized structure (CAM-B3LYP/6-31G\*) of *m*-BTB in the S<sub>1</sub> excited state.

| Atom | X        | Y        | Z        | Atom | X        | Y        | Z        |
|------|----------|----------|----------|------|----------|----------|----------|
| C    | -7.92599 | -0.74689 | 0.043748 | H    | -0.44792 | -1.27998 | 0.31268  |
| C    | -4.95927 | -0.64293 | 0.735928 | C    | 1.897395 | -3.45702 | -0.81984 |
| C    | -6.02448 | -1.36246 | 1.278493 | H    | 1.913926 | -4.30516 | -2.79678 |
| O    | -7.04816 | -1.7675  | 0.439451 | H    | 1.584182 | -2.43634 | 1.048045 |
| O    | -7.25381 | 0.412444 | -0.39066 | N    | 3.070413 | -4.12209 | -0.39603 |
| C    | -6.17882 | 0.190681 | -1.2265  | N    | 2.22917  | 4.626247 | 0.376605 |
| C    | -5.00138 | -0.32437 | -0.70188 | C    | 4.162413 | -4.27766 | -1.28771 |
| C    | -3.91488 | -0.19736 | 1.639917 | C    | 4.569814 | -3.21759 | -2.10256 |
| C    | -3.96137 | -0.6482  | 3.009769 | C    | 4.848711 | -5.49299 | -1.36077 |
| C    | -5.01835 | -1.42993 | 3.458564 | C    | 5.635648 | -3.37701 | -2.97889 |
| C    | -6.06794 | -1.77333 | 2.605461 | H    | 4.046163 | -2.26941 | -2.04552 |
| C    | -6.30874 | 0.585389 | -2.56817 | C    | 5.92551  | -5.6386  | -2.22611 |
| C    | -5.24922 | 0.445197 | -3.42494 | H    | 4.533932 | -6.32142 | -0.73538 |
| C    | -4.04128 | -0.13917 | -2.97562 | C    | 6.323029 | -4.58514 | -3.04364 |
| C    | -3.91248 | -0.54906 | -1.61785 | H    | 5.938279 | -2.54367 | -3.60564 |
| C    | -2.90762 | 0.680623 | 1.259636 | H    | 6.448218 | -6.58923 | -2.26964 |
| C    | -1.86574 | 1.113781 | 2.141998 | H    | 7.159974 | -4.70434 | -3.72401 |
| C    | -1.91492 | 0.603883 | 3.481828 | C    | 3.160581 | -4.63856 | 0.921813 |
| C    | -2.90414 | -0.23067 | 3.889098 | C    | 2.07754  | -5.30866 | 1.497746 |
| C    | -2.95516 | -0.35427 | -3.863   | C    | 4.336685 | -4.48704 | 1.661659 |
| C    | -1.80918 | -0.97031 | -3.44668 | C    | 2.169391 | -5.80629 | 2.791286 |
| C    | -1.68071 | -1.43072 | -2.10873 | H    | 1.164105 | -5.43629 | 0.926983 |
| C    | -2.72636 | -1.22073 | -1.23472 | C    | 4.427065 | -5.00415 | 2.947685 |
| H    | -8.55856 | -0.41428 | 0.872702 | H    | 5.178935 | -3.96311 | 1.222783 |
| H    | -8.52962 | -1.18179 | -0.75903 | C    | 3.344285 | -5.66211 | 3.522758 |
| H    | -5.03435 | -1.75468 | 4.494995 | H    | 1.318089 | -6.32297 | 3.223851 |
| H    | -6.90789 | -2.36795 | 2.946414 | H    | 5.348581 | -4.87864 | 3.507984 |
| H    | -7.25181 | 1.012987 | -2.89127 | H    | 3.415278 | -6.05858 | 4.530407 |
| H    | -5.33141 | 0.758336 | -4.4614  | C    | 2.015933 | 5.471437 | -0.74374 |
| H    | -2.93899 | 1.076955 | 0.254939 | C    | 0.801249 | 6.149719 | -0.8907  |
| H    | -2.91639 | -0.60091 | 4.910538 | C    | 3.017953 | 5.625206 | -1.70778 |
| H    | -3.05248 | -0.017   | -4.89117 | C    | 0.595755 | 6.968492 | -1.99171 |
| H    | -2.65391 | -1.6022  | -0.22428 | H    | 0.032243 | 6.040014 | -0.1342  |
| H    | -1.13615 | 0.867031 | 4.187975 | C    | 2.803232 | 6.451853 | -2.80086 |
| H    | -0.98393 | -1.10322 | -4.13867 | H    | 3.954119 | 5.089212 | -1.59847 |
| C    | -0.83427 | 1.989676 | 1.702353 | C    | 1.593136 | 7.124886 | -2.95078 |
| C    | 0.096324 | 2.601451 | 2.606948 | H    | -0.34678 | 7.496614 | -2.09412 |

|   |          |          |          |   |          |          |          |
|---|----------|----------|----------|---|----------|----------|----------|
| C | -0.65684 | 2.324037 | 0.315852 | H | 3.58381  | 6.562307 | -3.54672 |
| C | 1.083499 | 3.443894 | 2.184661 | H | 1.428779 | 7.767452 | -3.80942 |
| H | -0.00389 | 2.433156 | 3.672082 | C | 3.478244 | 4.675728 | 1.047944 |
| C | 0.330625 | 3.167869 | -0.11158 | C | 4.10285  | 3.492529 | 1.457011 |
| H | -1.2841  | 1.857331 | -0.43269 | C | 4.086426 | 5.908194 | 1.310627 |
| C | 1.234604 | 3.760355 | 0.804799 | C | 5.318653 | 3.547547 | 2.123686 |
| H | 1.740376 | 3.91052  | 2.909521 | H | 3.637649 | 2.538235 | 1.236582 |
| H | 0.44665  | 3.365159 | -1.17122 | C | 5.305104 | 5.949821 | 1.971224 |
| C | -0.44923 | -2.12551 | -1.66783 | H | 3.595259 | 6.824728 | 1.00345  |
| C | 0.256142 | -2.97323 | -2.52874 | C | 5.926155 | 4.772876 | 2.383559 |
| C | 0.053108 | -1.95736 | -0.37226 | H | 5.799516 | 2.62451  | 2.43126  |
| C | 1.401257 | -3.63581 | -2.1148  | H | 5.76803  | 6.910026 | 2.17498  |
| H | -0.11572 | -3.14993 | -3.5332  | H | 6.877773 | 4.811185 | 2.903275 |
| C | 1.206466 | -2.60221 | 0.045137 |   |          |          |          |

### References:

- [6] M. J. Frisch, G. W. Trucks, H. B. Schlegel, G. E. Scuseria, M. A. Robb, J. R. Cheeseman, G. Scalmani, V. Barone, B. Mennucci, G. A. H. Petersson, M. Nakatsuji, X. Caricato, H. P. F. Li, A. Hratchian, J. Izmaylov, G. Bloino, J. L. Zheng, M. Sonnenberg, M. Hada, K. Ehara, R. Toyota, J. Fukuda, M. Hasegawa, T. Ishida, Y. Nakajima, O. Honda, H. Kitao, T. Nakai, J. A. Vreven, J. E. Montgomery Jr., F. Peralta, M. Ogliaro, J. J. Bearpark, E. Heyd, K. N. Brothers, V. N. Kudin, T. Staroverov, R. Keith, J. Kobayashi, K. Normand, A. Raghavachari, J. C. Rendell, S. S. Burant, J. Iyengar, M. Tomasi, N. Cossi, J. M. Rega, M. Millam, J. E. Klene, J. B. Knox, V. Cross, C. Bakken, J. Adamo, R. Jaramillo, R. E. Gomperts, O. Stratmann, A. J. Yazyev, R. Austin, C. Cammi, J. W. Pomelli, R. L. Ochterski, K. Martin, V. G. Morokuma, G. A. Zakrzewski, P. Voth, J. J. Salvador, S. Dannenberg, A. D. Dapprich, O. Daniels, J. B. Farkas, J. V. Foresman, J. Ortiz, J. Cioslowski, D. J. Fox, Gaussian 09 Revision C.01, 2010.
- [7] (a) C. Lee, W. Yang, R. G. Parr, *Phys. Rev. B*, 1988, **37**, 785–789; (b) A. D. Becke, *J. Chem. Phys.* 1993, **98**, 1372; (c) A. D. Becke, *J. Chem. Phys.* 1993, **98**, 5648.
- [8] (a) R. Ditchfield, W. J. Hehre, J. A. Pople, *J. Chem. Phys.*, 1971, **54**, 724; (b) A. D. McLean, G. S. Chandler, *J. Chem. Phys.*, 1980, **72**, 5639.
